# Supplementary material for: E3 ligase FBXO2-mediated protein stability of insulin receptor regulates adipogenesis and metabolic health in obesity
Source: Research Square preprint supplement (doi:10.21203/rs.3.rs-5892373/v1), 2025-10-28
Supplement: Supplementary file 1 [file 064d8341fa327cdf90116eab.xlsx]

## Sheet: 20230920_195557_20230915XY1_Rep
PG.ProteinGroups	PG.Genes	PG.ProteinDescriptions	[1] 20230915_XY_DIA_S1_RE.raw.PG.Quantity
P06213	INSR	Insulin receptor	118716176
Q8TBY0	RBM46	Probable RNA-binding protein 46	90331360
Q9UKZ4	TENM1	Teneurin-1	25261452
P68363	TUBA1B	Tubulin alpha-1B chain	18145638
P05141	SLC25A5	ADP/ATP translocase 2	11280963
P07477;P07478;Q8NHM4	PRSS1;PRSS2;PRSS3P2	Trypsin-1;Trypsin-2;Putative trypsin-6	10530643
P08238	HSP90AB1	Heat shock protein HSP 90-beta	9025812
P68371	TUBB4B	Tubulin beta-4B chain	8.24808e+06
P36578	RPL4	60S ribosomal protein L4	8230793
P07437	TUBB	Tubulin beta chain	8.06286e+06
P50914	RPL14	60S ribosomal protein L14	7.92858e+06
P68104	EEF1A1	Elongation factor 1-alpha 1	7.63263e+06
P0DMV8;P0DMV9	HSPA1A;HSPA1B	Heat shock 70 kDa protein 1A;Heat shock 70 kDa protein 1B	7.47628e+06
Q13569	TDG	G/T mismatch-specific thymine DNA glycosylase	6950776
P06748	NPM1	Nucleophosmin	6.68166e+06
P62424	RPL7A	60S ribosomal protein L7a	6.6385e+06
Q07020	RPL18	60S ribosomal protein L18	6.44295e+06
P62888	RPL30	60S ribosomal protein L30	5822843
P08069	IGF1R	Insulin-like growth factor 1 receptor	5.72257e+06
P63104	YWHAZ	14-3-3 protein zeta/delta	5.42605e+06
P62917	RPL8	60S ribosomal protein L8	5246944
Q02878	RPL6	60S ribosomal protein L6	5.24623e+06
Q12931	TRAP1	Heat shock protein 75 kDa, mitochondrial	5.16601e+06
P18124	RPL7	60S ribosomal protein L7	4831698
Q9Y3U8	RPL36	60S ribosomal protein L36	4.78957e+06
P46778	RPL21	60S ribosomal protein L21	4760771
P61353	RPL27	60S ribosomal protein L27	4748828
P47914	RPL29	60S ribosomal protein L29	4.72468e+06
P40429	RPL13A	60S ribosomal protein L13a	4701902
P61247	RPS3A	40S ribosomal protein S3a	4.6966e+06
Q9NVD3	SETD4	SET domain-containing protein 4	4605037
P11142	HSPA8	Heat shock cognate 71 kDa protein	4434340
P61313	RPL15	60S ribosomal protein L15	4.37196e+06
P30050	RPL12	60S ribosomal protein L12	4254617
A0A075B6S2	IGKV2D-29	Immunoglobulin kappa variable 2D-29	4.23277e+06
Q13885	TUBB2A	Tubulin beta-2A chain	4.22178e+06
Q00325	SLC25A3	Phosphate carrier protein, mitochondrial	4.13836e+06
P19338	NCL	Nucleolin	4.0689e+06
P62701	RPS4X	40S ribosomal protein S4, X isoform	3950401
Q16543	CDC37	Hsp90 co-chaperone Cdc37	3.80257e+06
P62829	RPL23	60S ribosomal protein L23	3.64795e+06
P62851	RPS25	40S ribosomal protein S25	3.56698e+06
P62241	RPS8	40S ribosomal protein S8	3.56248e+06
P31946	YWHAB	14-3-3 protein beta/alpha	3.52078e+06
P39023	RPL3	60S ribosomal protein L3	3.48541e+06
P46776	RPL27A	60S ribosomal protein L27a	3441463
Q71UM5	RPS27L	40S ribosomal protein S27-like	3.4125e+06
P46781	RPS9	40S ribosomal protein S9	3.24407e+06
P62258	YWHAE	14-3-3 protein epsilon	3.21847e+06
Q06830	PRDX1	Peroxiredoxin-1	3.18562e+06
P62263	RPS14	40S ribosomal protein S14	3179289
P27635	RPL10	60S ribosomal protein L10	3.1755e+06
Q00839	HNRNPU	Heterogeneous nuclear ribonucleoprotein U	3.11976e+06
P62899	RPL31	60S ribosomal protein L31	2.96725e+06
P62266	RPS23	40S ribosomal protein S23	2.96281e+06
P62906	RPL10A	60S ribosomal protein L10a	2894204
P27824	CANX	Calnexin	2.89394e+06
P46779	RPL28	60S ribosomal protein L28	2.88427e+06
P62913	RPL11	60S ribosomal protein L11	2.85996e+06
P05388	RPLP0	60S acidic ribosomal protein P0	2829516
P26373	RPL13	60S ribosomal protein L13	2.80996e+06
P04637	TP53	Cellular tumor antigen p53	2.78631e+06
P05387	RPLP2	60S acidic ribosomal protein P2	2781194
P62280	RPS11	40S ribosomal protein S11	2.7693e+06
P62277	RPS13	40S ribosomal protein S13	2.76683e+06
Q02543	RPL18A	60S ribosomal protein L18a	2765144
Q99623	PHB2	Prohibitin-2	2.73944e+06
P15880	RPS2	40S ribosomal protein S2	2.64685e+06
P83731	RPL24	60S ribosomal protein L24	2625973
P62753	RPS6	40S ribosomal protein S6	2.56695e+06
P62910	RPL32	60S ribosomal protein L32	2489680
P18077	RPL35A	60S ribosomal protein L35a	2.44798e+06
P61254	RPL26	60S ribosomal protein L26	2.42558e+06
P62269	RPS18	40S ribosomal protein S18	2.39079e+06
P05386	RPLP1	60S acidic ribosomal protein P1	2.39029e+06
P07900	HSP90AA1	Heat shock protein HSP 90-alpha	2.35789e+06
P54652	HSPA2	Heat shock-related 70 kDa protein 2	2.29862e+06
Q96JN2	CCDC136	Coiled-coil domain-containing protein 136	2.29767e+06
P35268	RPL22	60S ribosomal protein L22	2.26406e+06
P01024	C3	Complement C3	2188900
P49207	RPL34	60S ribosomal protein L34	2.14309e+06
P11021	HSPA5	Endoplasmic reticulum chaperone BiP	2.09311e+06
P62750	RPL23A	60S ribosomal protein L23a	2.09155e+06
Q6EMB2	TTLL5	Tubulin polyglutamylase TTLL5	2.08324e+06
Q9UQ35	SRRM2	Serine/arginine repetitive matrix protein 2	2.05434e+06
P42766	RPL35	60S ribosomal protein L35	2.0444e+06
P10412	HIST1H1E	Histone H1.4	1.93778e+06
P33992	MCM5	DNA replication licensing factor MCM5	1935588
P18621	RPL17	60S ribosomal protein L17	1.91108e+06
P46777	RPL5	60S ribosomal protein L5	1.89485e+06
P23396	RPS3	40S ribosomal protein S3	1.88451e+06
Q15366	PCBP2	Poly(rC)-binding protein 2	1.83905e+06
Q969Q0	RPL36AL	60S ribosomal protein L36a-like	1.82977e+06
P84098	RPL19	60S ribosomal protein L19	1.79192e+06
P62244	RPS15A	40S ribosomal protein S15a	1.74923e+06
P28066	PSMA5	Proteasome subunit alpha type-5	1.748e+06
P62847	RPS24	40S ribosomal protein S24	1.73373e+06
P62249	RPS16	40S ribosomal protein S16	1.71601e+06
P25398	RPS12	40S ribosomal protein S12	1.70161e+06
P62854	RPS26	40S ribosomal protein S26	1.68038e+06
P12236	SLC25A6	ADP/ATP translocase 3	1.65115e+06
P63261	ACTG1	Actin, cytoplasmic 2	1.64229e+06
A0A0B4J1U7	IGHV6-1	Immunoglobulin heavy variable 6-1	1.62146e+06
P35232	PHB	Prohibitin	1617310
P25786	PSMA1	Proteasome subunit alpha type-1	1.57916e+06
P30101	PDIA3	Protein disulfide-isomerase A3	1.57398e+06
P62861	FAU	40S ribosomal protein S30	1.57207e+06
Q9BTE3	MCMBP	Mini-chromosome maintenance complex-binding protein	1.56879e+06
A0A0A0MS14	IGHV1-45	Immunoglobulin heavy variable 1-45	1.5356e+06
P61513	RPL37A	60S ribosomal protein L37a	1512914
P46782	RPS5	40S ribosomal protein S5	1512892
P04843	RPN1	Dolichyl-diphosphooligosaccharide--protein glycosyltransferase subunit 1	1.49765e+06
P25789	PSMA4	Proteasome subunit alpha type-4	1.48388e+06
P62979	RPS27A	Ubiquitin-40S ribosomal protein S27a	1.44477e+06
P25205	MCM3	DNA replication licensing factor MCM3	1.4295e+06
P28072	PSMB6	Proteasome subunit beta type-6	1.39768e+06
A0A0J9YX35	IGHV3-64D	Immunoglobulin heavy variable 3-64D	1.39685e+06
Q9P0L0	VAPA	Vesicle-associated membrane protein-associated protein A	1.38645e+06
P06239;P06241;P07947;P07948;P08631;P09769;P11362;P20794;P21802;P22455;P22607;P51451;Q8IZL9;Q9UPZ9	LCK;FYN;YES1;LYN;HCK;FGR;FGFR1;MAK;FGFR2;FGFR4;FGFR3;BLK;CDK20;ICK	Tyrosine-protein kinase Lck;Tyrosine-protein kinase Fyn;Tyrosine-protein kinase Yes;Tyrosine-protein kinase Lyn;Tyrosine-protein kinase HCK;Tyrosine-protein kinase Fgr;Fibroblast growth factor receptor 1;Serine/threonine-protein kinase MAK;Fibroblast growth factor receptor 2;Fibroblast growth factor receptor 4;Fibroblast growth factor receptor 3;Tyrosine-protein kinase Blk;Cyclin-dependent kinase…	1.33664e+06
P60866	RPS20	40S ribosomal protein S20	1.32995e+06
A0A0C4DH55;P01624	IGKV3D-7;IGKV3-15	Immunoglobulin kappa variable 3D-7;Immunoglobulin kappa variable 3-15	1.32931e+06
Q9Y3A6	TMED5	Transmembrane emp24 domain-containing protein 5	1.30525e+06
P08708	RPS17	40S ribosomal protein S17	1.30043e+06
P13639	EEF2	Elongation factor 2	1.29653e+06
O14818	PSMA7	Proteasome subunit alpha type-7	1.27039e+06
P0C0S8;P20671;Q16777;Q6FI13;Q96KK5;Q99878;Q9BTM1	HIST1H2AG;HIST1H2AD;HIST2H2AC;HIST2H2AA3;HIST1H2AH;HIST1H2AJ;H2AFJ	Histone H2A type 1;Histone H2A type 1-D;Histone H2A type 2-C;Histone H2A type 2-A;Histone H2A type 1-H;Histone H2A type 1-J;Histone H2A.J	1.26761e+06
P62081	RPS7	40S ribosomal protein S7	1.2505e+06
P25788	PSMA3	Proteasome subunit alpha type-3	1.22681e+06
P52272	HNRNPM	Heterogeneous nuclear ribonucleoprotein M	1224662
P04406	GAPDH	Glyceraldehyde-3-phosphate dehydrogenase	1.1974e+06
Q9UNE7	STUB1	E3 ubiquitin-protein ligase CHIP	1.19098e+06
B9A064	IGLL5	Immunoglobulin lambda-like polypeptide 5	1.18721e+06
P04264	KRT1	Keratin, type II cytoskeletal 1	1.18641e+06
P60900	PSMA6	Proteasome subunit alpha type-6	1.18479e+06
Q12906	ILF3	Interleukin enhancer-binding factor 3	1.17251e+06
P10599	TXN	Thioredoxin	1.16254e+06
Q13501	SQSTM1	Sequestosome-1	1.154e+06
P49368	CCT3	T-complex protein 1 subunit gamma	1151375
O43175	PHGDH	D-3-phosphoglycerate dehydrogenase	1.13095e+06
P28074	PSMB5	Proteasome subunit beta type-5	1.12657e+06
P17987	TCP1	T-complex protein 1 subunit alpha	1.11029e+06
P62318	SNRPD3	Small nuclear ribonucleoprotein Sm D3	1.10502e+06
Q7L5D6	GET4	Golgi to ER traffic protein 4 homolog	1.09316e+06
P07814	EPRS	Bifunctional glutamate/proline--tRNA ligase	1.09235e+06
P62841	RPS15	40S ribosomal protein S15	1.08928e+06
P20618	PSMB1	Proteasome subunit beta type-1	1.06977e+06
P39656	DDOST	Dolichyl-diphosphooligosaccharide--protein glycosyltransferase 48 kDa subunit	1057649
P13645	KRT10	Keratin, type I cytoskeletal 10	1.04618e+06
P27708	CAD	CAD protein	1.02341e+06
P49721	PSMB2	Proteasome subunit beta type-2	1.01907e+06
Q13200	PSMD2	26S proteasome non-ATPase regulatory subunit 2	1.00191e+06
Q05823	RNASEL	2-5A-dependent ribonuclease	1.00096e+06
O60814;P57053;P58876;P62807;Q5QNW6;Q93079;Q99877;Q99879;Q99880	HIST1H2BK;H2BFS;HIST1H2BD;HIST1H2BC;HIST2H2BF;HIST1H2BH;HIST1H2BN;HIST1H2BM;HIST1H2BL	Histone H2B type 1-K;Histone H2B type F-S;Histone H2B type 1-D;Histone H2B type 1-C/E/F/G/I;Histone H2B type 2-F;Histone H2B type 1-H;Histone H2B type 1-N;Histone H2B type 1-M;Histone H2B type 1-L	1.00037e+06
P09651	HNRNPA1	Heterogeneous nuclear ribonucleoprotein A1	990172
P33993	MCM7	DNA replication licensing factor MCM7	981972
P38646	HSPA9	Stress-70 protein, mitochondrial	969642
P11717	IGF2R	Cation-independent mannose-6-phosphate receptor	964085
P10809	HSPD1	60 kDa heat shock protein, mitochondrial	962980
P06312	IGKV4-1	Immunoglobulin kappa variable 4-1	962956
P14625	HSP90B1	Endoplasmin	958292
P50990	CCT8	T-complex protein 1 subunit theta	957271
P17844	DDX5	Probable ATP-dependent RNA helicase DDX5	955758
Q13247	SRSF6	Serine/arginine-rich splicing factor 6	941588
P25705	ATP5F1A	ATP synthase subunit alpha, mitochondrial	933495
P23528	CFL1	Cofilin-1	926760
P26641	EEF1G	Elongation factor 1-gamma	922416
P60709	ACTB	Actin, cytoplasmic 1	901058
Q8WWZ7	ABCA5	ATP-binding cassette sub-family A member 5	898172
Q02978	SLC25A11	Mitochondrial 2-oxoglutarate/malate carrier protein	871540
P50991	CCT4	T-complex protein 1 subunit delta	862440
P55072	VCP	Transitional endoplasmic reticulum ATPase	846251
P05023	ATP1A1	Sodium/potassium-transporting ATPase subunit alpha-1	815499
O95292	VAPB	Vesicle-associated membrane protein-associated protein B/C	809077
P22626	HNRNPA2B1	Heterogeneous nuclear ribonucleoproteins A2/B1	809043
P0DPH7;P0DPH8	TUBA3C;TUBA3D	Tubulin alpha-3C chain;Tubulin alpha-3D chain	806102
Q86U37	LINC01551	Uncharacterized protein encoded by LINC01551	804467
A0A0A0MS15;A0A0B4J1V6	IGHV3-49;IGHV3-73	Immunoglobulin heavy variable 3-49;Immunoglobulin heavy variable 3-73	801364
Q8NBX0	SCCPDH	Saccharopine dehydrogenase-like oxidoreductase	800083
O00571	DDX3X	ATP-dependent RNA helicase DDX3X	796017
Q9H0A0	NAT10	RNA cytidine acetyltransferase	778957
P62891;Q59GN2	RPL39;RPL39P5	60S ribosomal protein L39;Putative 60S ribosomal protein L39-like 5	772431
P62937	PPIA	Peptidyl-prolyl cis-trans isomerase A	770335
P32969	RPL9	60S ribosomal protein L9	765031
Q15084	PDIA6	Protein disulfide-isomerase A6	753093
P67809	YBX1	Nuclease-sensitive element-binding protein 1	745736
Q15365	PCBP1	Poly(rC)-binding protein 1	742494
P28070	PSMB4	Proteasome subunit beta type-4	742408
Q14697	GANAB	Neutral alpha-glucosidase AB	738162
Q9UBS4	DNAJB11	DnaJ homolog subfamily B member 11	731964
O00231	PSMD11	26S proteasome non-ATPase regulatory subunit 11	728992
Q96AY3	FKBP10	Peptidyl-prolyl cis-trans isomerase FKBP10	728489
Q92522	H1FX	Histone H1x	712642
Q9Y3B7	MRPL11	39S ribosomal protein L11, mitochondrial	702080
P60468	SEC61B	Protein transport protein Sec61 subunit beta	692364
Q99436	PSMB7	Proteasome subunit beta type-7	682900
P04259	KRT6B	Keratin, type II cytoskeletal 6B	681450
P0CK97	SLC35E2A	Solute carrier family 35 member E2A	665546
P17812	CTPS1	CTP synthase 1	664986
P39019	RPS19	40S ribosomal protein S19	663681
P61981	YWHAG	14-3-3 protein gamma	659750
Q9NYU2	UGGT1	UDP-glucose:glycoprotein glucosyltransferase 1	655066
Q12830	BPTF	Nucleosome-remodeling factor subunit BPTF	645635
P78527	PRKDC	DNA-dependent protein kinase catalytic subunit	645043
P50416	CPT1A	Carnitine O-palmitoyltransferase 1, liver isoform	638325
Q9Y6K0	CEPT1	Choline/ethanolaminephosphotransferase 1	635193
Q4G0P3	HYDIN	Hydrocephalus-inducing protein homolog	633430
Q14165	MLEC	Malectin	632922
P01892	HLA-A	HLA class I histocompatibility antigen, A-2 alpha chain	628196
Q99832	CCT7	T-complex protein 1 subunit eta	611036
O00425	IGF2BP3	Insulin-like growth factor 2 mRNA-binding protein 3	607255
Q58FF8	HSP90AB2P	Putative heat shock protein HSP 90-beta 2	607152
P28482	MAPK1	Mitogen-activated protein kinase 1	604836
P24666	ACP1	Low molecular weight phosphotyrosine protein phosphatase	599052
P60842	EIF4A1	Eukaryotic initiation factor 4A-I	597334
Q12905	ILF2	Interleukin enhancer-binding factor 2	594856
O14654	IRS4	Insulin receptor substrate 4	593247
P46379	BAG6	Large proline-rich protein BAG6	591927
Q15008	PSMD6	26S proteasome non-ATPase regulatory subunit 6	590638
P37108	SRP14	Signal recognition particle 14 kDa protein	589657
Q99615	DNAJC7	DnaJ homolog subfamily C member 7	588621
P35908	KRT2	Keratin, type II cytoskeletal 2 epidermal	583170
P42677	RPS27	40S ribosomal protein S27	580550
P61619	SEC61A1	Protein transport protein Sec61 subunit alpha isoform 1	579985
P43034	PAFAH1B1	Platelet-activating factor acetylhydrolase IB subunit alpha	579264
Q9BVP2	GNL3	Guanine nucleotide-binding protein-like 3	576991
Q96IV0	NGLY1	Peptide-N(4)-(N-acetyl-beta-glucosaminyl)asparagine amidase	576144
P53621	COPA	Coatomer subunit alpha	571484
Q14566	MCM6	DNA replication licensing factor MCM6	568919
P07910	HNRNPC	Heterogeneous nuclear ribonucleoproteins C1/C2	568625
F8WCM5;P01308	INS-IGF2;INS	Insulin, isoform 2;Insulin	568253
P05198	EIF2S1	Eukaryotic translation initiation factor 2 subunit 1	564796
O60506	SYNCRIP	Heterogeneous nuclear ribonucleoprotein Q	563786
P33991	MCM4	DNA replication licensing factor MCM4	563499
P13667	PDIA4	Protein disulfide-isomerase A4	562733
P52292	KPNA2	Importin subunit alpha-1	561023
Q9BQE3	TUBA1C	Tubulin alpha-1C chain	559383
P57088	TMEM33	Transmembrane protein 33	558542
P31943	HNRNPH1	Heterogeneous nuclear ribonucleoprotein H	558440
Q13263	TRIM28	Transcription intermediary factor 1-beta	554602
Q32P51	HNRNPA1L2	Heterogeneous nuclear ribonucleoprotein A1-like 2	551106
P63173	RPL38	60S ribosomal protein L38	548204
Q5JVF3	PCID2	PCI domain-containing protein 2	546430
P49411	TUFM	Elongation factor Tu, mitochondrial	544900
P12004	PCNA	Proliferating cell nuclear antigen	541137
P31689	DNAJA1	DnaJ homolog subfamily A member 1	533756
Q9Y241	HIGD1A	HIG1 domain family member 1A, mitochondrial	528918
P22061	PCMT1	Protein-L-isoaspartate(D-aspartate) O-methyltransferase	527315
P16403	HIST1H1C	Histone H1.2	521123
Q8TCJ2	STT3B	Dolichyl-diphosphooligosaccharide--protein glycosyltransferase subunit STT3B	520886
P62195	PSMC5	26S proteasome regulatory subunit 8	519737
P25787	PSMA2	Proteasome subunit alpha type-2	517070
Q9NZI8	IGF2BP1	Insulin-like growth factor 2 mRNA-binding protein 1	514736
Q13151	HNRNPA0	Heterogeneous nuclear ribonucleoprotein A0	514614
Q15029	EFTUD2	116 kDa U5 small nuclear ribonucleoprotein component	513211
P62191	PSMC1	26S proteasome regulatory subunit 4	512523
Q00610	CLTC	Clathrin heavy chain 1	507240
Q9Y4W6	AFG3L2	AFG3-like protein 2	504023
P61165	TMEM258	Transmembrane protein 258	503942
P53007	SLC25A1	Tricarboxylate transport protein, mitochondrial	502890
Q08211	DHX9	ATP-dependent RNA helicase A	498253
Q96C36	PYCR2	Pyrroline-5-carboxylate reductase 2	497803
P27348	YWHAQ	14-3-3 protein theta	495087
P60059	SEC61G	Protein transport protein Sec61 subunit gamma	490919
P11940	PABPC1	Polyadenylate-binding protein 1	490348
P08865	RPSA	40S ribosomal protein SA	485858
O60884	DNAJA2	DnaJ homolog subfamily A member 2	482055
Q9BSD7	NTPCR	Cancer-related nucleoside-triphosphatase	479147
P49720	PSMB3	Proteasome subunit beta type-3	477476
P55060	CSE1L	Exportin-2	477322
P48643	CCT5	T-complex protein 1 subunit epsilon	473761
Q9BQG0	MYBBP1A	Myb-binding protein 1A	468019
Q9NZ01	TECR	Very-long-chain enoyl-CoA reductase	467945
O00264	PGRMC1	Membrane-associated progesterone receptor component 1	466714
Q9P003	CNIH4	Protein cornichon homolog 4	466002
Q99460	PSMD1	26S proteasome non-ATPase regulatory subunit 1	465294
P62273	RPS29	40S ribosomal protein S29	462390
P07237	P4HB	Protein disulfide-isomerase	460351
O43242	PSMD3	26S proteasome non-ATPase regulatory subunit 3	458766
P35527	KRT9	Keratin, type I cytoskeletal 9	457674
P55209	NAP1L1	Nucleosome assembly protein 1-like 1	451654
Q9NR30	DDX21	Nucleolar RNA helicase 2	449711
Q7Z6Z7	HUWE1	E3 ubiquitin-protein ligase HUWE1	449132
P30304	CDC25A	M-phase inducer phosphatase 1	448290
P60891	PRPS1	Ribose-phosphate pyrophosphokinase 1	446493
P62304	SNRPE	Small nuclear ribonucleoprotein E	445211
O95456	PSMG1	Proteasome assembly chaperone 1	438044
P46087	NOP2	Probable 28S rRNA (cytosine(4447)-C(5))-methyltransferase	437758
P62993	GRB2	Growth factor receptor-bound protein 2	436887
Q9P258	RCC2	Protein RCC2	436683
Q14103	HNRNPD	Heterogeneous nuclear ribonucleoprotein D0	436551
Q9HCN8	SDF2L1	Stromal cell-derived factor 2-like protein 1	436303
Q04917	YWHAH	14-3-3 protein eta	436068
P06576	ATP5F1B	ATP synthase subunit beta, mitochondrial	434360
P61978	HNRNPK	Heterogeneous nuclear ribonucleoprotein K	434027
Q9UMS4	PRPF19	Pre-mRNA-processing factor 19	431909
P78371	CCT2	T-complex protein 1 subunit beta	429775
O43852	CALU	Calumenin	427581
O95831	AIFM1	Apoptosis-inducing factor 1, mitochondrial	425267
P52735	VAV2	Guanine nucleotide exchange factor VAV2	424202
Q9BQ75	CMSS1	Protein CMSS1	423413
Q15393	SF3B3	Splicing factor 3B subunit 3	422536
Q16186	ADRM1	Proteasomal ubiquitin receptor ADRM1	421909
P26599	PTBP1	Polypyrimidine tract-binding protein 1	419186
Q13257	MAD2L1	Mitotic spindle assembly checkpoint protein MAD2A	416882
P35998	PSMC2	26S proteasome regulatory subunit 7	414281
Q96SI9	STRBP	Spermatid perinuclear RNA-binding protein	406706
Q12907	LMAN2	Vesicular integral-membrane protein VIP36	404492
Q9NPD3	EXOSC4	Exosome complex component RRP41	403519
Q15185	PTGES3	Prostaglandin E synthase 3	402971
P51571	SSR4	Translocon-associated protein subunit delta	398695
O00487	PSMD14	26S proteasome non-ATPase regulatory subunit 14	398335
Q9BUF5	TUBB6	Tubulin beta-6 chain	396542
P56192	MARS	Methionine--tRNA ligase, cytoplasmic	395677
Q13322	GRB10	Growth factor receptor-bound protein 10	394227
Q8IYT4	KATNAL2	Katanin p60 ATPase-containing subunit A-like 2	394041
P17980	PSMC3	26S proteasome regulatory subunit 6A	392486
Q9BS26	ERP44	Endoplasmic reticulum resident protein 44	392401
P41252	IARS	Isoleucine--tRNA ligase, cytoplasmic	392346
P32119	PRDX2	Peroxiredoxin-2	392008
P62333	PSMC6	26S proteasome regulatory subunit 10B	390523
Q8NBS9	TXNDC5	Thioredoxin domain-containing protein 5	389628
P84103	SRSF3	Serine/arginine-rich splicing factor 3	387760
Q86V81	ALYREF	THO complex subunit 4	384918
P12956	XRCC6	X-ray repair cross-complementing protein 6	384183
O43684	BUB3	Mitotic checkpoint protein BUB3	379372
Q9BV68	RNF126	E3 ubiquitin-protein ligase RNF126	378115
P42167	TMPO	Lamina-associated polypeptide 2, isoforms beta/gamma	377028
Q96N23	CFAP54	Cilia- and flagella-associated protein 54	376280
Q7KZI7	MARK2	Serine/threonine-protein kinase MARK2	374141
P14618	PKM	Pyruvate kinase PKM	373321
Q99848	EBNA1BP2	Probable rRNA-processing protein EBP2	370786
Q5RKV6	EXOSC6	Exosome complex component MTR3	369906
Q9BVC6	TMEM109	Transmembrane protein 109	367472
Q99497	PARK7	Protein/nucleic acid deglycase DJ-1	365806
P41091	EIF2S3	Eukaryotic translation initiation factor 2 subunit 3	365147
P51665	PSMD7	26S proteasome non-ATPase regulatory subunit 7	362476
P11441	UBL4A	Ubiquitin-like protein 4A	359782
Q05209	PTPN12	Tyrosine-protein phosphatase non-receptor type 12	359196
P02649	APOE	Apolipoprotein E	356334
P62857	RPS28	40S ribosomal protein S28	356134
Q969V3	NCLN	Nicalin	354565
P30153	PPP2R1A	Serine/threonine-protein phosphatase 2A 65 kDa regulatory subunit A alpha isoform	350380
Q9NR12	PDLIM7	PDZ and LIM domain protein 7	343890
P11586	MTHFD1	C-1-tetrahydrofolate synthase, cytoplasmic	343450
P55036	PSMD4	26S proteasome non-ATPase regulatory subunit 4	342694
P27918	CFP	Properdin	342211
P53618	COPB1	Coatomer subunit beta	340192
O14980	XPO1	Exportin-1	339229
P43686	PSMC4	26S proteasome regulatory subunit 6B	337745
Q86VP6	CAND1	Cullin-associated NEDD8-dissociated protein 1	335701
Q32P28	P3H1	Prolyl 3-hydroxylase 1	335479
P22234	PAICS	Multifunctional protein ADE2	334678
Q9Y2Z0	SUGT1	Protein SGT1 homolog	333644
P84243	H3F3A	Histone H3.3	332797
P35613	BSG	Basigin	332609
Q9H3K6	BOLA2	BolA-like protein 2	332263
P62314	SNRPD1	Small nuclear ribonucleoprotein Sm D1	326120
Q05397	PTK2	Focal adhesion kinase 1	325912
O15042	U2SURP	U2 snRNP-associated SURP motif-containing protein	325286
Q92945	KHSRP	Far upstream element-binding protein 2	323432
Q8TEM1	NUP210	Nuclear pore membrane glycoprotein 210	322001
Q14318	FKBP8	Peptidyl-prolyl cis-trans isomerase FKBP8	319521
P21333	FLNA	Filamin-A	317744
O43143	DHX15	Pre-mRNA-splicing factor ATP-dependent RNA helicase DHX15	317429
P08195	SLC3A2	4F2 cell-surface antigen heavy chain	312748
P61289	PSME3	Proteasome activator complex subunit 3	312651
Q06323	PSME1	Proteasome activator complex subunit 1	309596
Q9UBB4	ATXN10	Ataxin-10	308330
Q96CS3	FAF2	FAS-associated factor 2	307264
P47897	QARS	Glutamine--tRNA ligase	305349
Q9BRP1	PDCD2L	Programmed cell death protein 2-like	305014
P27816	MAP4	Microtubule-associated protein 4	304152
P16615	ATP2A2	Sarcoplasmic/endoplasmic reticulum calcium ATPase 2	304077
P08243	ASNS	Asparagine synthetase [glutamine-hydrolyzing]	303006
P48556	PSMD8	26S proteasome non-ATPase regulatory subunit 8	301657
Q9BYG3	NIFK	MKI67 FHA domain-interacting nucleolar phosphoprotein	301615
Q7Z434	MAVS	Mitochondrial antiviral-signaling protein	301329
Q14684	RRP1B	Ribosomal RNA processing protein 1 homolog B	301119
P40227	CCT6A	T-complex protein 1 subunit zeta	300143
P42224	STAT1	Signal transducer and activator of transcription 1-alpha/beta	299523
P62316	SNRPD2	Small nuclear ribonucleoprotein Sm D2	294483
P14868	DARS	Aspartate--tRNA ligase, cytoplasmic	293885
Q969U7	PSMG2	Proteasome assembly chaperone 2	293084
Q9H0U3	MAGT1	Magnesium transporter protein 1	292373
Q9UNM6	PSMD13	26S proteasome non-ATPase regulatory subunit 13	290440
Q6P1J9	CDC73	Parafibromin	290264
P27797	CALR	Calreticulin	289682
Q9BQ67	GRWD1	Glutamate-rich WD repeat-containing protein 1	289025
P49327	FASN	Fatty acid synthase	288392
O76021	RSL1D1	Ribosomal L1 domain-containing protein 1	288313
Q8TED1	GPX8	Probable glutathione peroxidase 8	287891
Q8NFQ8	TOR1AIP2	Torsin-1A-interacting protein 2	286825
P40937	RFC5	Replication factor C subunit 5	286272
P46783	RPS10	40S ribosomal protein S10	285962
Q53GQ0	HSD17B12	Very-long-chain 3-oxoacyl-CoA reductase	285666
P38159	RBMX	RNA-binding motif protein, X chromosome	285449
Q9BW92	TARS2	Threonine--tRNA ligase, mitochondrial	284988
Q08J23	NSUN2	tRNA (cytosine(34)-C(5))-methyltransferase	281995
Q8NC51	SERBP1	Plasminogen activator inhibitor 1 RNA-binding protein	281515
Q15645	TRIP13	Pachytene checkpoint protein 2 homolog	281153
Q5JPE7	NOMO2	Nodal modulator 2	280685
A2VDJ0	TMEM131L	Transmembrane protein 131-like	280481
Q9UBM7	DHCR7	7-dehydrocholesterol reductase	279962
O14979	HNRNPDL	Heterogeneous nuclear ribonucleoprotein D-like	279151
Q13724	MOGS	Mannosyl-oligosaccharide glucosidase	278832
P45880	VDAC2	Voltage-dependent anion-selective channel protein 2	278586
Q13557	CAMK2D	Calcium/calmodulin-dependent protein kinase type II subunit delta	276880
Q92841	DDX17	Probable ATP-dependent RNA helicase DDX17	274176
Q9UDY6	TRIM10	Tripartite motif-containing protein 10	273710
Q9NPH2	ISYNA1	Inositol-3-phosphate synthase 1	273355
P14678;P63162	SNRPB;SNRPN	Small nuclear ribonucleoprotein-associated proteins B and B';Small nuclear ribonucleoprotein-associated protein N	272757
Q96DZ1	ERLEC1	Endoplasmic reticulum lectin 1	272707
Q9H7E9	C8orf33	UPF0488 protein C8orf33	272629
P62805	HIST1H4A	Histone H4	272329
Q86UE4	MTDH	Protein LYRIC	270221
Q9UJS0	SLC25A13	Calcium-binding mitochondrial carrier protein Aralar2	269787
Q9BU76	MMTAG2	Multiple myeloma tumor-associated protein 2	269070
Q13148	TARDBP	TAR DNA-binding protein 43	267177
O14744	PRMT5	Protein arginine N-methyltransferase 5	266782
Q9H9B4	SFXN1	Sideroflexin-1	266554
Q9NRW3	APOBEC3C	DNA dC->dU-editing enzyme APOBEC-3C	266209
Q8N1F7	NUP93	Nuclear pore complex protein Nup93	265652
Q6ZXV5	TMTC3	Protein O-mannosyl-transferase TMTC3	264737
Q96S55	WRNIP1	ATPase WRNIP1	264209
O00483	NDUFA4	Cytochrome c oxidase subunit NDUFA4	263411
Q9H3U1	UNC45A	Protein unc-45 homolog A	263037
Q14739	LBR	Delta(14)-sterol reductase	262054
P00338	LDHA	L-lactate dehydrogenase A chain	261471
P61803	DAD1	Dolichyl-diphosphooligosaccharide--protein glycosyltransferase subunit DAD1	261025
P01772;P0DP02	IGHV3-33;IGHV3-30-3	Immunoglobulin heavy variable 3-33;Immunoglobulin heavy variable 3-30-3	260364
Q13112	CHAF1B	Chromatin assembly factor 1 subunit B	259306
Q9H6E4	CCDC134	Coiled-coil domain-containing protein 134	258684
Q04637	EIF4G1	Eukaryotic translation initiation factor 4 gamma 1	257540
P50402	EMD	Emerin	255811
P22392	NME2	Nucleoside diphosphate kinase B	255751
Q9Y230	RUVBL2	RuvB-like 2	255338
P50454	SERPINH1	Serpin H1	255291
O00232	PSMD12	26S proteasome non-ATPase regulatory subunit 12	254455
P10155	TROVE2	60 kDa SS-A/Ro ribonucleoprotein	253870
P02768	ALB	Serum albumin	252705
O75533	SF3B1	Splicing factor 3B subunit 1	252624
P62633	CNBP	Cellular nucleic acid-binding protein	252388
Q9H3N1	TMX1	Thioredoxin-related transmembrane protein 1	252285
Q15050	RRS1	Ribosome biogenesis regulatory protein homolog	250408
Q9Y285	FARSA	Phenylalanine--tRNA ligase alpha subunit	249294
P49458	SRP9	Signal recognition particle 9 kDa protein	247904
Q16629	SRSF7	Serine/arginine-rich splicing factor 7	246186
Q13310	PABPC4	Polyadenylate-binding protein 4	245835
P04350	TUBB4A	Tubulin beta-4A chain	244560
P02042;P68871	HBD;HBB	Hemoglobin subunit delta;Hemoglobin subunit beta	244364
O60762	DPM1	Dolichol-phosphate mannosyltransferase subunit 1	244321
P13010	XRCC5	X-ray repair cross-complementing protein 5	243258
Q8N7H5	PAF1	RNA polymerase II-associated factor 1 homolog	242717
P63220	RPS21	40S ribosomal protein S21	242518
O95433	AHSA1	Activator of 90 kDa heat shock protein ATPase homolog 1	241877
P30480	HLA-B	HLA class I histocompatibility antigen, B-42 alpha chain	240347
A0A087WSY6	IGKV3D-15	Immunoglobulin kappa variable 3D-15	239167
Q06265	EXOSC9	Exosome complex component RRP45	238593
Q8IWS0	PHF6	PHD finger protein 6	237916
Q9P035	HACD3	Very-long-chain (3R)-3-hydroxyacyl-CoA dehydratase 3	237580
Q9BSJ2	TUBGCP2	Gamma-tubulin complex component 2	237576
Q8TD08	MAPK15	Mitogen-activated protein kinase 15	237033
P13797	PLS3	Plastin-3	236354
Q7L2E3	DHX30	ATP-dependent RNA helicase DHX30	235646
P16989	YBX3	Y-box-binding protein 3	235278
O95140	MFN2	Mitofusin-2	235277
Q9Y265	RUVBL1	RuvB-like 1	235196
P15924	DSP	Desmoplakin	233947
Q8NFF5	FLAD1	FAD synthase	233266
Q8TDN6	BRIX1	Ribosome biogenesis protein BRX1 homolog	232307
P21912	SDHB	Succinate dehydrogenase [ubiquinone] iron-sulfur subunit, mitochondrial	231535
P53985	SLC16A1	Monocarboxylate transporter 1	231094
Q14444	CAPRIN1	Caprin-1	229519
P09661	SNRPA1	U2 small nuclear ribonucleoprotein A'	228511
Q9NQT5	EXOSC3	Exosome complex component RRP40	228018
O15541	RNF113A	E3 ubiquitin-protein ligase RNF113A	227734
Q8NHP8	PLBD2	Putative phospholipase B-like 2	227687
P04844	RPN2	Dolichyl-diphosphooligosaccharide--protein glycosyltransferase subunit 2	227531
P51116	FXR2	Fragile X mental retardation syndrome-related protein 2	227451
Q99459	CDC5L	Cell division cycle 5-like protein	227305
Q9H6K4	OPA3	Optic atrophy 3 protein	226020
O14735	CDIPT	CDP-diacylglycerol--inositol 3-phosphatidyltransferase	225911
P08621	SNRNP70	U1 small nuclear ribonucleoprotein 70 kDa	224968
Q01130	SRSF2	Serine/arginine-rich splicing factor 2	224887
P54136	RARS	Arginine--tRNA ligase, cytoplasmic	223788
Q9UHV9	PFDN2	Prefoldin subunit 2	223226
P13489	RNH1	Ribonuclease inhibitor	223149
Q93009	USP7	Ubiquitin carboxyl-terminal hydrolase 7	223045
P30536	TSPO	Translocator protein	222014
P52597	HNRNPF	Heterogeneous nuclear ribonucleoprotein F	221814
O14967	CLGN	Calmegin	221248
P17858	PFKL	ATP-dependent 6-phosphofructokinase, liver type	221111
P21741	MDK	Midkine	220913
Q96EY1	DNAJA3	DnaJ homolog subfamily A member 3, mitochondrial	220741
P0C0L4	C4A	Complement C4-A	220592
Q6DKI1	RPL7L1	60S ribosomal protein L7-like 1	219849
P14314	PRKCSH	Glucosidase 2 subunit beta	219567
P56134	ATP5MF	ATP synthase subunit f, mitochondrial	219297
Q9Y3B9	RRP15	RRP15-like protein	219293
Q9BTV4	TMEM43	Transmembrane protein 43	219173
Q53S58	TMEM177	Transmembrane protein 177	218001
O15260	SURF4	Surfeit locus protein 4	217695
Q7Z4Q2	HEATR3	HEAT repeat-containing protein 3	216842
Q14204	DYNC1H1	Cytoplasmic dynein 1 heavy chain 1	215403
O00459	PIK3R2	Phosphatidylinositol 3-kinase regulatory subunit beta	214624
P42696	RBM34	RNA-binding protein 34	214581
Q96AG4	LRRC59	Leucine-rich repeat-containing protein 59	214159
Q8NDZ4	DIPK2A	Divergent protein kinase domain 2A	213693
Q09028	RBBP4	Histone-binding protein RBBP4	212976
Q96SB4	SRPK1	SRSF protein kinase 1	212952
P11802	CDK4	Cyclin-dependent kinase 4	212835
P60981	DSTN	Destrin	212641
P46109	CRKL	Crk-like protein	212269
Q6PKG0	LARP1	La-related protein 1	212182
Q3ZCQ8	TIMM50	Mitochondrial import inner membrane translocase subunit TIM50	211233
Q7Z2W4	ZC3HAV1	Zinc finger CCCH-type antiviral protein 1	210688
P20339	RAB5A	Ras-related protein Rab-5A	209807
Q15233	NONO	Non-POU domain-containing octamer-binding protein	209514
Q9H5H4	ZNF768	Zinc finger protein 768	208890
P98173	FAM3A	Protein FAM3A	208591
P33316	DUT	Deoxyuridine 5'-triphosphate nucleotidohydrolase, mitochondrial	208081
Q5JTV8	TOR1AIP1	Torsin-1A-interacting protein 1	207715
Q9Y678	COPG1	Coatomer subunit gamma-1	207263
Q9Y5A9	YTHDF2	YTH domain-containing family protein 2	206435
Q01780	EXOSC10	Exosome component 10	205999
Q9H936	SLC25A22	Mitochondrial glutamate carrier 1	205952
Q14498	RBM39	RNA-binding protein 39	205802
P28340	POLD1	DNA polymerase delta catalytic subunit	205579
P12235	SLC25A4	ADP/ATP translocase 1	204630
E9PRG8	C11orf98	Uncharacterized protein C11orf98	203609
P23284	PPIB	Peptidyl-prolyl cis-trans isomerase B	203079
Q9Y6C9	MTCH2	Mitochondrial carrier homolog 2	202931
Q9UKA9	PTBP2	Polypyrimidine tract-binding protein 2	201905
Q9NVP1	DDX18	ATP-dependent RNA helicase DDX18	201744
Q14257	RCN2	Reticulocalbin-2	201737
Q92572	AP3S1	AP-3 complex subunit sigma-1	201105
P41240	CSK	Tyrosine-protein kinase CSK	200358
Q9H0D6	XRN2	5'-3' exoribonuclease 2	200342
Q13136	PPFIA1	Liprin-alpha-1	199138
P35250	RFC2	Replication factor C subunit 2	198560
Q13435	SF3B2	Splicing factor 3B subunit 2	198276
P06493	CDK1	Cyclin-dependent kinase 1	197938
P42285	MTREX	Exosome RNA helicase MTR4	197838
Q92542	NCSTN	Nicastrin	197596
O95793	STAU1	Double-stranded RNA-binding protein Staufen homolog 1	197121
O43390	HNRNPR	Heterogeneous nuclear ribonucleoprotein R	196509
Q07065	CKAP4	Cytoskeleton-associated protein 4	196182
O00139	KIF2A	Kinesin-like protein KIF2A	195928
O43290	SART1	U4/U6.U5 tri-snRNP-associated protein 1	195868
Q9BZE4	GTPBP4	Nucleolar GTP-binding protein 1	195446
Q9BRX2	PELO	Protein pelota homolog	194459
Q8IY81	FTSJ3	pre-rRNA processing protein FTSJ3	194377
Q07955	SRSF1	Serine/arginine-rich splicing factor 1	194288
O95373	IPO7	Importin-7	194271
O43324	EEF1E1	Eukaryotic translation elongation factor 1 epsilon-1	192284
P00738	HP	Haptoglobin	192179
P35249	RFC4	Replication factor C subunit 4	190906
O14929	HAT1	Histone acetyltransferase type B catalytic subunit	189968
O60232	SSSCA1	Sjoegren syndrome/scleroderma autoantigen 1	189893
Q6P4A7	SFXN4	Sideroflexin-4	189101
P52701	MSH6	DNA mismatch repair protein Msh6	188985
Q92545	TMEM131	Transmembrane protein 131	186137
P63241	EIF5A	Eukaryotic translation initiation factor 5A-1	186000
O00567	NOP56	Nucleolar protein 56	185939
Q9BUJ2	HNRNPUL1	Heterogeneous nuclear ribonucleoprotein U-like protein 1	184227
O95347	SMC2	Structural maintenance of chromosomes protein 2	184008
P49257	LMAN1	Protein ERGIC-53	183920
P05771	PRKCB	Protein kinase C beta type	183799
P11387	TOP1	DNA topoisomerase 1	183736
Q15070	OXA1L	Mitochondrial inner membrane protein OXA1L	183456
Q53H96	PYCR3	Pyrroline-5-carboxylate reductase 3	181976
Q92616	GCN1	eIF-2-alpha kinase activator GCN1	181863
Q9Y295	DRG1	Developmentally-regulated GTP-binding protein 1	181682
P51570	GALK1	Galactokinase	181504
Q13610	PWP1	Periodic tryptophan protein 1 homolog	181234
Q92598	HSPH1	Heat shock protein 105 kDa	181205
Q8TEX9	IPO4	Importin-4	181125
Q9UBV2	SEL1L	Protein sel-1 homolog 1	180473
Q13243	SRSF5	Serine/arginine-rich splicing factor 5	180356
Q9UJV9	DDX41	Probable ATP-dependent RNA helicase DDX41	179671
Q658P3	STEAP3	Metalloreductase STEAP3	179510
Q14554	PDIA5	Protein disulfide-isomerase A5	178784
P30041	PRDX6	Peroxiredoxin-6	177748
P36542	ATP5F1C	ATP synthase subunit gamma, mitochondrial	176988
O00178	GTPBP1	GTP-binding protein 1	174823
O00410	IPO5	Importin-5	174672
P09874	PARP1	Poly [ADP-ribose] polymerase 1	174183
A8MWD9;P62308	SNRPGP15;SNRPG	Putative small nuclear ribonucleoprotein G-like protein 15;Small nuclear ribonucleoprotein G	173372
Q9BRJ6	C7orf50	Uncharacterized protein C7orf50	172304
Q9HCU5	PREB	Prolactin regulatory element-binding protein	171661
O95071	UBR5	E3 ubiquitin-protein ligase UBR5	169873
Q1KMD3	HNRNPUL2	Heterogeneous nuclear ribonucleoprotein U-like protein 2	169698
Q9HAV4	XPO5	Exportin-5	169601
P17655	CAPN2	Calpain-2 catalytic subunit	169118
P16402	HIST1H1D	Histone H1.3	168938
P14174	MIF	Macrophage migration inhibitory factor	168810
Q9Y3I0	RTCB	tRNA-splicing ligase RtcB homolog	168242
O14925	TIMM23	Mitochondrial import inner membrane translocase subunit Tim23	168141
P01871	IGHM	Immunoglobulin heavy constant mu	167938
P00492	HPRT1	Hypoxanthine-guanine phosphoribosyltransferase	167176
Q92947	GCDH	Glutaryl-CoA dehydrogenase, mitochondrial	167122
Q3ZCM7	TUBB8	Tubulin beta-8 chain	166763
Q8N1G4	LRRC47	Leucine-rich repeat-containing protein 47	166384
Q06124	PTPN11	Tyrosine-protein phosphatase non-receptor type 11	166260
P06737	PYGL	Glycogen phosphorylase, liver form	166085
P0DN76;Q01081	U2AF1L5;U2AF1	Splicing factor U2AF 35 kDa subunit-like protein;Splicing factor U2AF 35 kDa subunit	165969
O43681	ASNA1	ATPase ASNA1	165926
P50570	DNM2	Dynamin-2	165809
O75340	PDCD6	Programmed cell death protein 6	165770
O60832	DKC1	H/ACA ribonucleoprotein complex subunit DKC1	165583
P22102	GART	Trifunctional purine biosynthetic protein adenosine-3	165541
Q96GQ7	DDX27	Probable ATP-dependent RNA helicase DDX27	164830
Q86VN1	VPS36	Vacuolar protein-sorting-associated protein 36	164707
P46977	STT3A	Dolichyl-diphosphooligosaccharide--protein glycosyltransferase subunit STT3A	164260
Q9P2J5	LARS	Leucine--tRNA ligase, cytoplasmic	163823
P51991	HNRNPA3	Heterogeneous nuclear ribonucleoprotein A3	163435
P43307	SSR1	Translocon-associated protein subunit alpha	162780
Q9Y3B2	EXOSC1	Exosome complex component CSL4	162426
P23246	SFPQ	Splicing factor, proline- and glutamine-rich	162081
Q9UL68	MYT1L	Myelin transcription factor 1-like protein	162028
Q9NTJ3	SMC4	Structural maintenance of chromosomes protein 4	162007
Q9Y312	AAR2	Protein AAR2 homolog	161934
P23526	AHCY	Adenosylhomocysteinase	161204
Q8NI60	COQ8A	Atypical kinase COQ8A, mitochondrial	160898
Q9NW13	RBM28	RNA-binding protein 28	160801
P49915	GMPS	GMP synthase [glutamine-hydrolyzing]	160291
Q15024	EXOSC7	Exosome complex component RRP42	160195
Q9Y2T2	AP3M1	AP-3 complex subunit mu-1	160164
Q9HB71	CACYBP	Calcyclin-binding protein	159259
O00203	AP3B1	AP-3 complex subunit beta-1	158207
Q9NVI7	ATAD3A	ATPase family AAA domain-containing protein 3A	157912
Q9NQT4	EXOSC5	Exosome complex component RRP46	157337
Q8IV08	PLD3	Phospholipase D3	156439
Q92973	TNPO1	Transportin-1	156361
Q9BQA1	WDR77	Methylosome protein 50	155731
Q96B26	EXOSC8	Exosome complex component RRP43	155422
Q69YN2	CWF19L1	CWF19-like protein 1	155324
P02745	C1QA	Complement C1q subcomponent subunit A	154856
P53680	AP2S1	AP-2 complex subunit sigma	154714
P63244	RACK1	Receptor of activated protein C kinase 1	154289
Q8IXB1	DNAJC10	DnaJ homolog subfamily C member 10	153420
P26196	DDX6	Probable ATP-dependent RNA helicase DDX6	153348
Q15005	SPCS2	Signal peptidase complex subunit 2	153302
Q9Y4R8	TELO2	Telomere length regulation protein TEL2 homolog	153217
O00148	DDX39A	ATP-dependent RNA helicase DDX39A	153204
Q13685	AAMP	Angio-associated migratory cell protein	153103
P51148	RAB5C	Ras-related protein Rab-5C	152714
O94905	ERLIN2	Erlin-2	151884
Q3YEC7	RABL6	Rab-like protein 6	151363
P52294	KPNA1	Importin subunit alpha-5	151189
Q9P0P0	RNF181	E3 ubiquitin-protein ligase RNF181	151098
P84090	ERH	Enhancer of rudimentary homolog	150803
Q9H2V7	SPNS1	Protein spinster homolog 1	150701
Q9Y2L1	DIS3	Exosome complex exonuclease RRP44	150400
Q13155	AIMP2	Aminoacyl tRNA synthase complex-interacting multifunctional protein 2	149604
Q8N5G2	MACO1	Macoilin	148991
Q9BUN8	DERL1	Derlin-1	148979
O00505	KPNA3	Importin subunit alpha-4	148955
Q16576	RBBP7	Histone-binding protein RBBP7	148754
O95816	BAG2	BAG family molecular chaperone regulator 2	148466
Q9UBX3	SLC25A10	Mitochondrial dicarboxylate carrier	148278
Q7Z2T5	TRMT1L	TRMT1-like protein	147917
Q07666	KHDRBS1	KH domain-containing, RNA-binding, signal transduction-associated protein 1	147761
Q5T4S7	UBR4	E3 ubiquitin-protein ligase UBR4	147160
P20042	EIF2S2	Eukaryotic translation initiation factor 2 subunit 2	147140
Q5BJF2	TMEM97	Sigma intracellular receptor 2	147058
Q14974	KPNB1	Importin subunit beta-1	146712
Q9UHB9	SRP68	Signal recognition particle subunit SRP68	146579
O43592	XPOT	Exportin-T	146512
P62714	PPP2CB	Serine/threonine-protein phosphatase 2A catalytic subunit beta isoform	146336
Q9UJA5	TRMT6	tRNA (adenine(58)-N(1))-methyltransferase non-catalytic subunit TRM6	145753
Q9BQ39	DDX50	ATP-dependent RNA helicase DDX50	145745
P82933	MRPS9	28S ribosomal protein S9, mitochondrial	145454
P13807	GYS1	Glycogen [starch] synthase, muscle	145189
O00743	PPP6C	Serine/threonine-protein phosphatase 6 catalytic subunit	145075
P34932	HSPA4	Heat shock 70 kDa protein 4	144837
Q00341	HDLBP	Vigilin	144720
O75643	SNRNP200	U5 small nuclear ribonucleoprotein 200 kDa helicase	144221
Q9UJZ1	STOML2	Stomatin-like protein 2, mitochondrial	143422
Q8NE71	ABCF1	ATP-binding cassette sub-family F member 1	143080
P40938	RFC3	Replication factor C subunit 3	142937
Q8TCG1	CIP2A	Protein CIP2A	142800
P83881	RPL36A	60S ribosomal protein L36a	142477
Q8N9T8	KRI1	Protein KRI1 homolog	142220
O76061	STC2	Stanniocalcin-2	141898
Q9NRP0	OSTC	Oligosaccharyltransferase complex subunit OSTC	141513
Q9H6S0	YTHDC2	3'-5' RNA helicase YTHDC2	141445
O14681	EI24	Etoposide-induced protein 2.4 homolog	141042
Q9NWW5	CLN6	Ceroid-lipofuscinosis neuronal protein 6	140503
Q9NX58	LYAR	Cell growth-regulating nucleolar protein	140492
Q8WVX9	FAR1	Fatty acyl-CoA reductase 1	140097
Q9H1E5	TMX4	Thioredoxin-related transmembrane protein 4	139867
Q13438	OS9	Protein OS-9	139584
Q8IYI6	EXOC8	Exocyst complex component 8	139418
O00469	PLOD2	Procollagen-lysine,2-oxoglutarate 5-dioxygenase 2	139229
Q16637	SMN1	Survival motor neuron protein	138346
Q13868	EXOSC2	Exosome complex component RRP4	137941
Q8TDD1	DDX54	ATP-dependent RNA helicase DDX54	137856
Q8NI36	WDR36	WD repeat-containing protein 36	137594
P19623	SRM	Spermidine synthase	137535
Q13217	DNAJC3	DnaJ homolog subfamily C member 3	137299
Q9Y383	LUC7L2	Putative RNA-binding protein Luc7-like 2	137259
Q13283	G3BP1	Ras GTPase-activating protein-binding protein 1	137239
Q05519	SRSF11	Serine/arginine-rich splicing factor 11	137142
P41250	GARS	Glycine--tRNA ligase	136426
Q9BZX2	UCK2	Uridine-cytidine kinase 2	136371
Q6P5R6	RPL22L1	60S ribosomal protein L22-like 1	136150
P35251	RFC1	Replication factor C subunit 1	135974
Q9Y3Z3	SAMHD1	Deoxynucleoside triphosphate triphosphohydrolase SAMHD1	135921
Q9UK45	LSM7	U6 snRNA-associated Sm-like protein LSm7	135108
P10515	DLAT	Dihydrolipoyllysine-residue acetyltransferase component of pyruvate dehydrogenase complex, mitochondrial	135045
Q96P70	IPO9	Importin-9	134963
Q96H79	ZC3HAV1L	Zinc finger CCCH-type antiviral protein 1-like	134518
P09496	CLTA	Clathrin light chain A	134397
P38919	EIF4A3	Eukaryotic initiation factor 4A-III	134295
Q96IX5	ATP5MD	Up-regulated during skeletal muscle growth protein 5	133890
P63167	DYNLL1	Dynein light chain 1, cytoplasmic	132740
O43670	ZNF207	BUB3-interacting and GLEBS motif-containing protein ZNF207	132098
P36955	SERPINF1	Pigment epithelium-derived factor	131981
Q15046	KARS	Lysine--tRNA ligase	131947
Q15758	SLC1A5	Neutral amino acid transporter B(0)	131288
Q9UMX0	UBQLN1	Ubiquilin-1	131239
P08670	VIM	Vimentin	130721
P62877	RBX1	E3 ubiquitin-protein ligase RBX1	130675
P06280	GLA	Alpha-galactosidase A	130655
P07384	CAPN1	Calpain-1 catalytic subunit	130609
P55786	NPEPPS	Puromycin-sensitive aminopeptidase	130295
Q9Y520	PRRC2C	Protein PRRC2C	129934
P35606	COPB2	Coatomer subunit beta'	129736
Q53H12	AGK	Acylglycerol kinase, mitochondrial	129597
Q96AA3	RFT1	Protein RFT1 homolog	129566
Q15293	RCN1	Reticulocalbin-1	128769
O75607	NPM3	Nucleoplasmin-3	128736
Q15018	ABRAXAS2	BRISC complex subunit Abraxas 2	128685
Q9NP97	DYNLRB1	Dynein light chain roadblock-type 1	128681
Q86U42	PABPN1	Polyadenylate-binding protein 2	128437
P29692	EEF1D	Elongation factor 1-delta	128362
Q14997	PSME4	Proteasome activator complex subunit 4	128293
Q8N726	CDKN2A	Tumor suppressor ARF	128197
P63208	SKP1	S-phase kinase-associated protein 1	128139
P53396	ACLY	ATP-citrate synthase	127892
Q9BVA1	TUBB2B	Tubulin beta-2B chain	127612
Q12797	ASPH	Aspartyl/asparaginyl beta-hydroxylase	127603
Q3KQU3	MAP7D1	MAP7 domain-containing protein 1	127577
Q9UL46	PSME2	Proteasome activator complex subunit 2	127473
Q9H7B2	RPF2	Ribosome production factor 2 homolog	126990
P82930	MRPS34	28S ribosomal protein S34, mitochondrial	126770
P78362	SRPK2	SRSF protein kinase 2	126532
Q96N67	DOCK7	Dedicator of cytokinesis protein 7	126436
Q15120	PDK3	[Pyruvate dehydrogenase (acetyl-transferring)] kinase isozyme 3, mitochondrial	126385
P26639	TARS	Threonine--tRNA ligase, cytoplasmic	126384
Q9UG63	ABCF2	ATP-binding cassette sub-family F member 2	126331
O75396	SEC22B	Vesicle-trafficking protein SEC22b	126300
P62306	SNRPF	Small nuclear ribonucleoprotein F	126210
O95573	ACSL3	Long-chain-fatty-acid--CoA ligase 3	125401
Q6PD62	CTR9	RNA polymerase-associated protein CTR9 homolog	125106
Q02809	PLOD1	Procollagen-lysine,2-oxoglutarate 5-dioxygenase 1	125079
Q9UNF1	MAGED2	Melanoma-associated antigen D2	124863
O76071	CIAO1	Probable cytosolic iron-sulfur protein assembly protein CIAO1	124548
P02786	TFRC	Transferrin receptor protein 1	124506
Q7KZF4	SND1	Staphylococcal nuclease domain-containing protein 1	124464
Q8TC07	TBC1D15	TBC1 domain family member 15	124158
Q8WUK0	PTPMT1	Phosphatidylglycerophosphatase and protein-tyrosine phosphatase 1	123884
Q04323	UBXN1	UBX domain-containing protein 1	123660
A0FGR8	ESYT2	Extended synaptotagmin-2	123535
P53041	PPP5C	Serine/threonine-protein phosphatase 5	123468
P11177	PDHB	Pyruvate dehydrogenase E1 component subunit beta, mitochondrial	123295
P00367	GLUD1	Glutamate dehydrogenase 1, mitochondrial	123250
Q13308	PTK7	Inactive tyrosine-protein kinase 7	123242
Q9Y6Y0	IVNS1ABP	Influenza virus NS1A-binding protein	122766
Q9NXR7	BABAM2	BRISC and BRCA1-A complex member 2	122693
Q9UNL2	SSR3	Translocon-associated protein subunit gamma	122614
P53677	AP3M2	AP-3 complex subunit mu-2	122010
Q99942	RNF5	E3 ubiquitin-protein ligase RNF5	121892
P07355	ANXA2	Annexin A2	121891
O75534	CSDE1	Cold shock domain-containing protein E1	121794
Q8N5K1	CISD2	CDGSH iron-sulfur domain-containing protein 2	121566
Q8NEW0	SLC30A7	Zinc transporter 7	121424
P49591	SARS	Serine--tRNA ligase, cytoplasmic	121359
Q9Y6G9	DYNC1LI1	Cytoplasmic dynein 1 light intermediate chain 1	121144
P57678	GEMIN4	Gem-associated protein 4	121087
O15226	NKRF	NF-kappa-B-repressing factor	120347
Q9UL16	CFAP45	Cilia- and flagella-associated protein 45	120009
P35573	AGL	Glycogen debranching enzyme	119779
P39748	FEN1	Flap endonuclease 1	119660
P08237	PFKM	ATP-dependent 6-phosphofructokinase, muscle type	119616
Q16630	CPSF6	Cleavage and polyadenylation specificity factor subunit 6	119516
Q96A33	CCDC47	Coiled-coil domain-containing protein 47	119394
P08559	PDHA1	Pyruvate dehydrogenase E1 component subunit alpha, somatic form, mitochondrial	119272
Q8NBJ5	COLGALT1	Procollagen galactosyltransferase 1	119138
Q9NNW5	WDR6	WD repeat-containing protein 6	118876
Q16531	DDB1	DNA damage-binding protein 1	118871
P43487	RANBP1	Ran-specific GTPase-activating protein	118870
Q86X55	CARM1	Histone-arginine methyltransferase CARM1	118846
Q14008	CKAP5	Cytoskeleton-associated protein 5	118763
Q2NL82	TSR1	Pre-rRNA-processing protein TSR1 homolog	118578
P42704	LRPPRC	Leucine-rich PPR motif-containing protein, mitochondrial	118512
P09543	CNP	2',3'-cyclic-nucleotide 3'-phosphodiesterase	118082
P55084	HADHB	Trifunctional enzyme subunit beta, mitochondrial	117791
Q9NR50	EIF2B3	Translation initiation factor eIF-2B subunit gamma	117767
Q8IZ69	TRMT2A	tRNA (uracil-5-)-methyltransferase homolog A	117674
A5YKK6	CNOT1	CCR4-NOT transcription complex subunit 1	117433
Q14696	MESD	LRP chaperone MESD	117392
Q99733	NAP1L4	Nucleosome assembly protein 1-like 4	117158
O43264	ZW10	Centromere/kinetochore protein zw10 homolog	117129
Q9UM00	TMCO1	Calcium load-activated calcium channel	116969
Q9Y679	AUP1	Ancient ubiquitous protein 1	116892
P61020	RAB5B	Ras-related protein Rab-5B	116880
O75746	SLC25A12	Calcium-binding mitochondrial carrier protein Aralar1	116736
Q9Y6M1	IGF2BP2	Insulin-like growth factor 2 mRNA-binding protein 2	116521
O43617	TRAPPC3	Trafficking protein particle complex subunit 3	116433
Q6UB35	MTHFD1L	Monofunctional C1-tetrahydrofolate synthase, mitochondrial	116364
Q96QK1	VPS35	Vacuolar protein sorting-associated protein 35	116294
Q02388	COL7A1	Collagen alpha-1(VII) chain	116035
Q14738	PPP2R5D	Serine/threonine-protein phosphatase 2A 56 kDa regulatory subunit delta isoform	115886
Q9BPX3	NCAPG	Condensin complex subunit 3	115688
O15269	SPTLC1	Serine palmitoyltransferase 1	115549
O76094	SRP72	Signal recognition particle subunit SRP72	115481
Q99943	AGPAT1	1-acyl-sn-glycerol-3-phosphate acyltransferase alpha	115465
Q9BQT8	SLC25A21	Mitochondrial 2-oxodicarboxylate carrier	115394
P06396	GSN	Gelsolin	114694
Q13451	FKBP5	Peptidyl-prolyl cis-trans isomerase FKBP5	114438
Q6YN16	HSDL2	Hydroxysteroid dehydrogenase-like protein 2	114378
P00403	MT-CO2	Cytochrome c oxidase subunit 2	114000
P24941	CDK2	Cyclin-dependent kinase 2	113886
Q96DI7	SNRNP40	U5 small nuclear ribonucleoprotein 40 kDa protein	113762
Q5VWZ2	LYPLAL1	Lysophospholipase-like protein 1	113591
Q5T280	SPOUT1	Putative methyltransferase C9orf114	112918
Q9UN37	VPS4A	Vacuolar protein sorting-associated protein 4A	112658
Q9NQ55	PPAN	Suppressor of SWI4 1 homolog	112444
Q9NSD9	FARSB	Phenylalanine--tRNA ligase beta subunit	112381
Q9H0R1	AP5M1	AP-5 complex subunit mu-1	112147
P0DPB6	POLR1D	DNA-directed RNA polymerases I and III subunit RPAC2	111951
Q15003	NCAPH	Condensin complex subunit 2	111704
Q9H2U1	DHX36	ATP-dependent DNA/RNA helicase DHX36	111702
Q5SW79	CEP170	Centrosomal protein of 170 kDa	111534
Q9UNQ2	DIMT1	Probable dimethyladenosine transferase	111418
Q8WVM7	STAG1	Cohesin subunit SA-1	111394
Q9Y3C1	NOP16	Nucleolar protein 16	111112
A6QL64;Q8N2N9	ANKRD36;ANKRD36B	Ankyrin repeat domain-containing protein 36A;Ankyrin repeat domain-containing protein 36B	110393
O96005	CLPTM1	Cleft lip and palate transmembrane protein 1	109802
Q09161	NCBP1	Nuclear cap-binding protein subunit 1	109755
Q49A26	GLYR1	Putative oxidoreductase GLYR1	109378
Q9UK22	FBXO2	F-box only protein 2	109269
O95477	ABCA1	ATP-binding cassette sub-family A member 1	109124
P28288	ABCD3	ATP-binding cassette sub-family D member 3	108582
Q9Y4P3	TBL2	Transducin beta-like protein 2	108529
Q3SXM5	HSDL1	Inactive hydroxysteroid dehydrogenase-like protein 1	108485
P35637	FUS	RNA-binding protein FUS	108468
Q76M96	CCDC80	Coiled-coil domain-containing protein 80	108433
O15355	PPM1G	Protein phosphatase 1G	107937
Q8WU90	ZC3H15	Zinc finger CCCH domain-containing protein 15	107355
Q9Y4L1	HYOU1	Hypoxia up-regulated protein 1	107347
O00541	PES1	Pescadillo homolog	107021
Q6P1M0	SLC27A4	Long-chain fatty acid transport protein 4	106906
Q9H3G5	CPVL	Probable serine carboxypeptidase CPVL	106825
O14617	AP3D1	AP-3 complex subunit delta-1	106773
Q96F07	CYFIP2	Cytoplasmic FMR1-interacting protein 2	106753
P49593	PPM1F	Protein phosphatase 1F	106546
P01031	C5	Complement C5	106177
P36969	GPX4	Phospholipid hydroperoxide glutathione peroxidase	106131
Q14692	BMS1	Ribosome biogenesis protein BMS1 homolog	106078
Q15054	POLD3	DNA polymerase delta subunit 3	106049
P63151	PPP2R2A	Serine/threonine-protein phosphatase 2A 55 kDa regulatory subunit B alpha isoform	106017
P48507	GCLM	Glutamate--cysteine ligase regulatory subunit	105975
Q96J01	THOC3	THO complex subunit 3	105918
P09012	SNRPA	U1 small nuclear ribonucleoprotein A	105827
Q96HS1	PGAM5	Serine/threonine-protein phosphatase PGAM5, mitochondrial	105740
Q04837	SSBP1	Single-stranded DNA-binding protein, mitochondrial	105646
Q9Y3B4	SF3B6	Splicing factor 3B subunit 6	105590
P13995	MTHFD2	Bifunctional methylenetetrahydrofolate dehydrogenase/cyclohydrolase, mitochondrial	105212
O60825	PFKFB2	6-phosphofructo-2-kinase/fructose-2,6-bisphosphatase 2	105175
Q12904	AIMP1	Aminoacyl tRNA synthase complex-interacting multifunctional protein 1	105070
Q9H173	SIL1	Nucleotide exchange factor SIL1	105060
Q6IAN0	DHRS7B	Dehydrogenase/reductase SDR family member 7B	105025
O60678	PRMT3	Protein arginine N-methyltransferase 3	104985
Q05639	EEF1A2	Elongation factor 1-alpha 2	104923
P12268	IMPDH2	Inosine-5'-monophosphate dehydrogenase 2	104837
Q15287	RNPS1	RNA-binding protein with serine-rich domain 1	104718
O95801	TTC4	Tetratricopeptide repeat protein 4	104573
Q13573	SNW1	SNW domain-containing protein 1	104364
Q13547	HDAC1	Histone deacetylase 1	104240
Q9H9A6	LRRC40	Leucine-rich repeat-containing protein 40	104193
Q8NBU5	ATAD1	ATPase family AAA domain-containing protein 1	104184
Q9NV31	IMP3	U3 small nucleolar ribonucleoprotein protein IMP3	104154
Q14839	CHD4	Chromodomain-helicase-DNA-binding protein 4	104145
Q9P2K2	TXNDC16	Thioredoxin domain-containing protein 16	104141
Q9BXS6	NUSAP1	Nucleolar and spindle-associated protein 1	104024
Q9BT22	ALG1	Chitobiosyldiphosphodolichol beta-mannosyltransferase	103951
Q8IY37	DHX37	Probable ATP-dependent RNA helicase DHX37	103667
Q9NR09	BIRC6	Baculoviral IAP repeat-containing protein 6	103318
Q6NZY4	ZCCHC8	Zinc finger CCHC domain-containing protein 8	103023
O00629	KPNA4	Importin subunit alpha-3	102954
Q7RTV0	PHF5A	PHD finger-like domain-containing protein 5A	102806
Q99729	HNRNPAB	Heterogeneous nuclear ribonucleoprotein A/B	102777
Q14152	EIF3A	Eukaryotic translation initiation factor 3 subunit A	102651
Q86Y56	DNAAF5	Dynein assembly factor 5, axonemal	102623
Q9UGP8	SEC63	Translocation protein SEC63 homolog	102582
Q8WVM8	SCFD1	Sec1 family domain-containing protein 1	102122
P07305	H1F0	Histone H1.0	102027
P55265	ADAR	Double-stranded RNA-specific adenosine deaminase	102022
P48651	PTDSS1	Phosphatidylserine synthase 1	101810
O60841	EIF5B	Eukaryotic translation initiation factor 5B	101686
Q8IWV8	UBR2	E3 ubiquitin-protein ligase UBR2	101497
Q99575	POP1	Ribonucleases P/MRP protein subunit POP1	101343
Q9UN86	G3BP2	Ras GTPase-activating protein-binding protein 2	101322
P18583	SON	Protein SON	101170
Q8WVY7	UBLCP1	Ubiquitin-like domain-containing CTD phosphatase 1	101150
Q8IZL8	PELP1	Proline-, glutamic acid- and leucine-rich protein 1	101124
Q6PML9	SLC30A9	Zinc transporter 9	101058
Q9UL40	ZNF346	Zinc finger protein 346	100757
P48634	PRRC2A	Protein PRRC2A	100582
O75616	ERAL1	GTPase Era, mitochondrial	100205
Q12849	GRSF1	G-rich sequence factor 1	100158
O14828	SCAMP3	Secretory carrier-associated membrane protein 3	100123
Q15165	PON2	Serum paraoxonase/arylesterase 2	99977.8
P09497	CLTB	Clathrin light chain B	99551
Q00577	PURA	Transcriptional activator protein Pur-alpha	99521.6
Q9NVI1	FANCI	Fanconi anemia group I protein	99452.7
P78316	NOP14	Nucleolar protein 14	99436.5
Q9Y5M8	SRPRB	Signal recognition particle receptor subunit beta	99262.6
Q96IW7	SEC22A	Vesicle-trafficking protein SEC22a	99173.9
P61927	RPL37	60S ribosomal protein L37	98789
Q6P2Q9	PRPF8	Pre-mRNA-processing-splicing factor 8	98620.9
Q9Y224	RTRAF	RNA transcription, translation and transport factor protein	98561.2
P49755	TMED10	Transmembrane emp24 domain-containing protein 10	98272
P15151	PVR	Poliovirus receptor	98170.5
P49736	MCM2	DNA replication licensing factor MCM2	98092.8
O75145	PPFIA3	Liprin-alpha-3	98049
P54886	ALDH18A1	Delta-1-pyrroline-5-carboxylate synthase	98046.4
O60725	ICMT	Protein-S-isoprenylcysteine O-methyltransferase	97939
Q8WVC0	LEO1	RNA polymerase-associated protein LEO1	97853.4
P13473	LAMP2	Lysosome-associated membrane glycoprotein 2	97607.1
Q9NSV4	DIAPH3	Protein diaphanous homolog 3	97138.6
Q92499	DDX1	ATP-dependent RNA helicase DDX1	96621.2
Q15125	EBP	3-beta-hydroxysteroid-Delta(8),Delta(7)-isomerase	96579.7
Q9Y5U2	TSSC4	Protein TSSC4	96217.5
Q9Y5Y2	NUBP2	Cytosolic Fe-S cluster assembly factor NUBP2	96156.7
Q9HBH1	PDF	Peptide deformylase, mitochondrial	96094.6
Q9BU23	LMF2	Lipase maturation factor 2	96082.1
Q7KZN9	COX15	Cytochrome c oxidase assembly protein COX15 homolog	96009.7
P78347	GTF2I	General transcription factor II-I	96000.6
Q0VDF9	HSPA14	Heat shock 70 kDa protein 14	95922.1
P10586	PTPRF	Receptor-type tyrosine-protein phosphatase F	95880.5
Q8NF37	LPCAT1	Lysophosphatidylcholine acyltransferase 1	95766
P08779	KRT16	Keratin, type I cytoskeletal 16	95447.1
P05455	SSB	Lupus La protein	95413.8
Q99816	TSG101	Tumor susceptibility gene 101 protein	95321.8
O75400	PRPF40A	Pre-mRNA-processing factor 40 homolog A	95270.8
Q15388	TOMM20	Mitochondrial import receptor subunit TOM20 homolog	95043.1
P19525	EIF2AK2	Interferon-induced, double-stranded RNA-activated protein kinase	95034.7
Q9Y6E2	BZW2	Basic leucine zipper and W2 domain-containing protein 2	95010.1
Q5T3I0	GPATCH4	G patch domain-containing protein 4	94614.2
Q9H497	TOR3A	Torsin-3A	94607.2
O94906	PRPF6	Pre-mRNA-processing factor 6	94240.8
Q9H892	TTC12	Tetratricopeptide repeat protein 12	94178.4
O00422	SAP18	Histone deacetylase complex subunit SAP18	94127.6
P54709	ATP1B3	Sodium/potassium-transporting ATPase subunit beta-3	94009.3
Q96CW1	AP2M1	AP-2 complex subunit mu	93866.4
O75251	NDUFS7	NADH dehydrogenase [ubiquinone] iron-sulfur protein 7, mitochondrial	93701
Q96PK6	RBM14	RNA-binding protein 14	93612.4
Q13162	PRDX4	Peroxiredoxin-4	93478
Q96EY7	PTCD3	Pentatricopeptide repeat domain-containing protein 3, mitochondrial	93470.5
Q01813	PFKP	ATP-dependent 6-phosphofructokinase, platelet type	93427.6
Q9UKX7	NUP50	Nuclear pore complex protein Nup50	93363.6
O14579	COPE	Coatomer subunit epsilon	93306.5
A0A0J9YXX1	IGHV5-10-1	Immunoglobulin heavy variable 5-10-1	93305.4
O14734	ACOT8	Acyl-coenzyme A thioesterase 8	93130.8
Q13586	STIM1	Stromal interaction molecule 1	92838.9
P78346	RPP30	Ribonuclease P protein subunit p30	92710.2
O94822	LTN1	E3 ubiquitin-protein ligase listerin	92574.5
P53350	PLK1	Serine/threonine-protein kinase PLK1	92518.4
Q96EY4	TMA16	Translation machinery-associated protein 16	92063.7
Q9BYB4	GNB1L	Guanine nucleotide-binding protein subunit beta-like protein 1	91974.3
P56962	STX17	Syntaxin-17	91648.6
P07195	LDHB	L-lactate dehydrogenase B chain	91579.9
P49406	MRPL19	39S ribosomal protein L19, mitochondrial	91267.2
P08579	SNRPB2	U2 small nuclear ribonucleoprotein B''	91134.4
P51610	HCFC1	Host cell factor 1	90812.2
Q8N3C0	ASCC3	Activating signal cointegrator 1 complex subunit 3	90784
Q9GZR7	DDX24	ATP-dependent RNA helicase DDX24	90744.3
Q5VT66	2024-03-01	Mitochondrial amidoxime-reducing component 1	90701.5
P47755	CAPZA2	F-actin-capping protein subunit alpha-2	90622.3
Q9Y256	RCE1	CAAX prenyl protease 2	90489.6
Q8NEZ5	FBXO22	F-box only protein 22	90378.7
O95757	HSPA4L	Heat shock 70 kDa protein 4L	90339.4
P48444	ARCN1	Coatomer subunit delta	90320.7
P09382	LGALS1	Galectin-1	90256.5
Q8NI27	THOC2	THO complex subunit 2	90117
Q9GZS3	WDR61	WD repeat-containing protein 61	90059.6
P56589	PEX3	Peroxisomal biogenesis factor 3	89984.1
O75600	GCAT	2-amino-3-ketobutyrate coenzyme A ligase, mitochondrial	89894
Q9Y3F4	STRAP	Serine-threonine kinase receptor-associated protein	89744.9
Q9NXE4	SMPD4	Sphingomyelin phosphodiesterase 4	89740.2
Q9NZL9	MAT2B	Methionine adenosyltransferase 2 subunit beta	89466.7
O95881	TXNDC12	Thioredoxin domain-containing protein 12	89406.9
O60716	CTNND1	Catenin delta-1	89296.9
P43243	MATR3	Matrin-3	89286.2
P27986	PIK3R1	Phosphatidylinositol 3-kinase regulatory subunit alpha	89040.1
O00411	POLRMT	DNA-directed RNA polymerase, mitochondrial	88850.8
Q9Y512	SAMM50	Sorting and assembly machinery component 50 homolog	88823.8
Q5VV42	CDKAL1	Threonylcarbamoyladenosine tRNA methylthiotransferase	88691
P82912	MRPS11	28S ribosomal protein S11, mitochondrial	88402.6
Q96IJ6	GMPPA	Mannose-1-phosphate guanyltransferase alpha	88277.2
P62826	RAN	GTP-binding nuclear protein Ran	88246.8
Q14331	FRG1	Protein FRG1	88008.2
Q9NRG9	AAAS	Aladin	87994.2
Q8NBM4	UBAC2	Ubiquitin-associated domain-containing protein 2	87855.3
Q3MHD2	LSM12	Protein LSM12 homolog	87842.4
Q9BRT6	LLPH	Protein LLP homolog	87730.3
Q13242	SRSF9	Serine/arginine-rich splicing factor 9	87570.8
Q7RTP0	NIPA1	Magnesium transporter NIPA1	87300.3
P11172	UMPS	Uridine 5'-monophosphate synthase	87290.2
Q9Y5K5	UCHL5	Ubiquitin carboxyl-terminal hydrolase isozyme L5	87218.6
P07333;P08922	CSF1R;ROS1	Macrophage colony-stimulating factor 1 receptor;Proto-oncogene tyrosine-protein kinase ROS	87110
Q13561	DCTN2	Dynactin subunit 2	86877.1
Q5VTL8	PRPF38B	Pre-mRNA-splicing factor 38B	86708.1
P52789	HK2	Hexokinase-2	86689
Q14694	USP10	Ubiquitin carboxyl-terminal hydrolase 10	86633.2
Q13428	TCOF1	Treacle protein	86320.9
Q5JTH9	RRP12	RRP12-like protein	86240.6
P53597	SUCLG1	Succinate--CoA ligase [ADP/GDP-forming] subunit alpha, mitochondrial	86228.3
Q99536	VAT1	Synaptic vesicle membrane protein VAT-1 homolog	86195.4
Q96K37	SLC35E1	Solute carrier family 35 member E1	86191.3
O15235	MRPS12	28S ribosomal protein S12, mitochondrial	85632.5
Q9H0S4	DDX47	Probable ATP-dependent RNA helicase DDX47	85608.6
Q96I24	FUBP3	Far upstream element-binding protein 3	85475.8
Q9Y2R4	DDX52	Probable ATP-dependent RNA helicase DDX52	85329.1
Q9Y277	VDAC3	Voltage-dependent anion-selective channel protein 3	85124.8
Q14247	CTTN	Src substrate cortactin	84998.9
Q9Y2R5	MRPS17	28S ribosomal protein S17, mitochondrial	84954.2
P51648	ALDH3A2	Fatty aldehyde dehydrogenase	84812.4
Q9Y3Y2	CHTOP	Chromatin target of PRMT1 protein	84795.4
Q5BJH7	YIF1B	Protein YIF1B	84755.1
P49750	YLPM1	YLP motif-containing protein 1	84709.4
Q0VGE8	ZNF816	Zinc finger protein 816	84617.8
O75964	ATP5MG	ATP synthase subunit g, mitochondrial	84556.8
Q9NUU7	DDX19A	ATP-dependent RNA helicase DDX19A	84421.3
P13674	P4HA1	Prolyl 4-hydroxylase subunit alpha-1	84312.6
Q08170	SRSF4	Serine/arginine-rich splicing factor 4	83881.8
Q10471	GALNT2	Polypeptide N-acetylgalactosaminyltransferase 2	83817.4
Q92890	UFD1	Ubiquitin recognition factor in ER-associated degradation protein 1	83683.9
O95104;Q9UPN6	SCAF4;SCAF8	Splicing factor, arginine/serine-rich 15;Protein SCAF8	83618.9
O75306	NDUFS2	NADH dehydrogenase [ubiquinone] iron-sulfur protein 2, mitochondrial	83553.5
O75976	CPD	Carboxypeptidase D	83470.7
O00442	RTCA	RNA 3'-terminal phosphate cyclase	83410.9
O95163	ELP1	Elongator complex protein 1	83391.3
P42695	NCAPD3	Condensin-2 complex subunit D3	83233.3
O43819	SCO2	Protein SCO2 homolog, mitochondrial	83055.4
Q92552	MRPS27	28S ribosomal protein S27, mitochondrial	83042.8
Q92974	ARHGEF2	Rho guanine nucleotide exchange factor 2	82829.8
P06454	PTMA	Prothymosin alpha	82741.5
P36873	PPP1CC	Serine/threonine-protein phosphatase PP1-gamma catalytic subunit	82526.7
Q8WUY1	THEM6	Protein THEM6	82447.2
P40939	HADHA	Trifunctional enzyme subunit alpha, mitochondrial	82417.8
Q9UBF2	COPG2	Coatomer subunit gamma-2	82356.1
O94826	TOMM70	Mitochondrial import receptor subunit TOM70	82336.2
Q9UKD2	MRTO4	mRNA turnover protein 4 homolog	82214.1
P61077	UBE2D3	Ubiquitin-conjugating enzyme E2 D3	82165.2
Q9Y6V0	PCLO	Protein piccolo	82053.4
Q5VYK3	ECPAS	Proteasome adapter and scaffold protein ECM29	82048.5
P21964	COMT	Catechol O-methyltransferase	81969.6
P02795;P04732;P13640;P80297;Q8N339	MT2A;MT1E;MT1G;MT1X;MT1M	Metallothionein-2;Metallothionein-1E;Metallothionein-1G;Metallothionein-1X;Metallothionein-1M	81940
P14866	HNRNPL	Heterogeneous nuclear ribonucleoprotein L	81922
Q8IUR7	ARMC8	Armadillo repeat-containing protein 8	81756.3
P22087	FBL	rRNA 2'-O-methyltransferase fibrillarin	81755.2
Q9UHX1	PUF60	Poly(U)-binding-splicing factor PUF60	81719.4
Q00535	CDK5	Cyclin-dependent-like kinase 5	81709.3
P82914	MRPS15	28S ribosomal protein S15, mitochondrial	81638.7
B5ME19;Q99613	EIF3CL;EIF3C	Eukaryotic translation initiation factor 3 subunit C-like protein;Eukaryotic translation initiation factor 3 subunit C	81632
P06733	ENO1	Alpha-enolase	81317.5
P30048	PRDX3	Thioredoxin-dependent peroxide reductase, mitochondrial	81244.4
Q13595	TRA2A	Transformer-2 protein homolog alpha	81144.7
P27544	CERS1	Ceramide synthase 1	81076.6
O95302	FKBP9	Peptidyl-prolyl cis-trans isomerase FKBP9	81070.4
Q8WTV0	SCARB1	Scavenger receptor class B member 1	80955.4
Q6P158	DHX57	Putative ATP-dependent RNA helicase DHX57	80795.2
Q8WUA4	GTF3C2	General transcription factor 3C polypeptide 2	80635.4
P24534	EEF1B2	Elongation factor 1-beta	80621.3
Q92990	GLMN	Glomulin	80606.6
P56750	CLDN17	Claudin-17	80568
Q15904	ATP6AP1	V-type proton ATPase subunit S1	80269
P61160	ACTR2	Actin-related protein 2	80192.3
P23921	RRM1	Ribonucleoside-diphosphate reductase large subunit	80073.6
Q99714	HSD17B10	3-hydroxyacyl-CoA dehydrogenase type-2	80008.1
Q9Y3D8	AK6	Adenylate kinase isoenzyme 6	79968.8
Q7L8L6	FASTKD5	FAST kinase domain-containing protein 5, mitochondrial	79953.9
P00390	GSR	Glutathione reductase, mitochondrial	79841.6
O60256	PRPSAP2	Phosphoribosyl pyrophosphate synthase-associated protein 2	79747.9
Q9H0E2	TOLLIP	Toll-interacting protein	79650.6
P55769	SNU13	NHP2-like protein 1	79576.6
P31153	MAT2A	S-adenosylmethionine synthase isoform type-2	79417
O75934	BCAS2	Pre-mRNA-splicing factor SPF27	79386.6
P42025	ACTR1B	Beta-centractin	79313.8
P32322	PYCR1	Pyrroline-5-carboxylate reductase 1, mitochondrial	79224.4
Q15386	UBE3C	Ubiquitin-protein ligase E3C	79148.8
Q8IX12	CCAR1	Cell division cycle and apoptosis regulator protein 1	79117.7
P31040	SDHA	Succinate dehydrogenase [ubiquinone] flavoprotein subunit, mitochondrial	79099
Q9H9L3	ISG20L2	Interferon-stimulated 20 kDa exonuclease-like 2	79007.3
O95159	ZFPL1	Zinc finger protein-like 1	79001.8
Q96GA3	LTV1	Protein LTV1 homolog	78999.3
P56182	RRP1	Ribosomal RNA processing protein 1 homolog A	78929.2
Q9H4L4	SENP3	Sentrin-specific protease 3	78870
P31948	STIP1	Stress-induced-phosphoprotein 1	78809
Q8IUR0	TRAPPC5	Trafficking protein particle complex subunit 5	78752.9
P02774	GC	Vitamin D-binding protein	78750.9
Q8WY22	BRI3BP	BRI3-binding protein	78341
P83916;Q13185	CBX1;CBX3	Chromobox protein homolog 1;Chromobox protein homolog 3	78127.5
Q9NRF8	CTPS2	CTP synthase 2	78122.4
Q13505	MTX1	Metaxin-1	78030.6
Q9ULT8	HECTD1	E3 ubiquitin-protein ligase HECTD1	77948.7
P68400	CSNK2A1	Casein kinase II subunit alpha	77798
O95400	CD2BP2	CD2 antigen cytoplasmic tail-binding protein 2	77720.3
Q9NX63	CHCHD3	MICOS complex subunit MIC19	77477
Q15021	NCAPD2	Condensin complex subunit 1	77456.3
Q93008	USP9X	Probable ubiquitin carboxyl-terminal hydrolase FAF-X	77416.1
Q9NPE3	NOP10	H/ACA ribonucleoprotein complex subunit 3	77364.7
O15270	SPTLC2	Serine palmitoyltransferase 2	77305.6
Q9NTJ5	SACM1L	Phosphatidylinositide phosphatase SAC1	77255.2
O75155	CAND2	Cullin-associated NEDD8-dissociated protein 2	77187.3
O00165	HAX1	HCLS1-associated protein X-1	77166.1
Q9UHI6	DDX20	Probable ATP-dependent RNA helicase DDX20	76554.5
O60684	KPNA6	Importin subunit alpha-7	76499.2
P50440	GATM	Glycine amidinotransferase, mitochondrial	76311.9
Q7LGA3	HS2ST1	Heparan sulfate 2-O-sulfotransferase 1	76194
Q14671	PUM1	Pumilio homolog 1	76154
Q8WWM7	ATXN2L	Ataxin-2-like protein	76012.3
Q9NYF8	BCLAF1	Bcl-2-associated transcription factor 1	75892.7
O15027	SEC16A	Protein transport protein Sec16A	75797
Q96HA1	POM121	Nuclear envelope pore membrane protein POM 121	75791
P30040	ERP29	Endoplasmic reticulum resident protein 29	75707.5
Q9BXP5	SRRT	Serrate RNA effector molecule homolog	75421.6
Q9UF33	EPHA6	Ephrin type-A receptor 6	75365.9
O15145	ARPC3	Actin-related protein 2/3 complex subunit 3	75351.5
O43159	RRP8	Ribosomal RNA-processing protein 8	75300
O60293	ZFC3H1	Zinc finger C3H1 domain-containing protein	75299.3
Q96TA2	YME1L1	ATP-dependent zinc metalloprotease YME1L1	75254.9
Q9Y3D3	MRPS16	28S ribosomal protein S16, mitochondrial	75019
Q9Y399	MRPS2	28S ribosomal protein S2, mitochondrial	74995.1
O95394	PGM3	Phosphoacetylglucosamine mutase	74903.7
O14802	POLR3A	DNA-directed RNA polymerase III subunit RPC1	74862.9
Q13895	BYSL	Bystin	74856.9
Q9UKF6	CPSF3	Cleavage and polyadenylation specificity factor subunit 3	74853.3
Q8IVL6	P3H3	Prolyl 3-hydroxylase 3	74834.9
Q9Y619	SLC25A15	Mitochondrial ornithine transporter 1	74793.4
Q9Y5Q9	GTF3C3	General transcription factor 3C polypeptide 3	74696.6
P54707	ATP12A	Potassium-transporting ATPase alpha chain 2	74646
Q96CQ1;Q9BSK2	SLC25A36;SLC25A33	Solute carrier family 25 member 36;Solute carrier family 25 member 33	74533.8
Q9Y2R9	MRPS7	28S ribosomal protein S7, mitochondrial	74500.1
P20020	ATP2B1	Plasma membrane calcium-transporting ATPase 1	74114.3
Q9BUQ8	DDX23	Probable ATP-dependent RNA helicase DDX23	74027.1
Q9NRZ9	HELLS	Lymphoid-specific helicase	74017
Q9NTK5	OLA1	Obg-like ATPase 1	73961.3
Q07812	BAX	Apoptosis regulator BAX	73830.6
Q9BZI7	UPF3B	Regulator of nonsense transcripts 3B	73803.3
P37268	FDFT1	Squalene synthase	73714.7
O15381	NVL	Nuclear valosin-containing protein-like	73672.2
P82650	MRPS22	28S ribosomal protein S22, mitochondrial	73607.1
O43660	PLRG1	Pleiotropic regulator 1	73580.1
P19174	PLCG1	1-phosphatidylinositol 4,5-bisphosphate phosphodiesterase gamma-1	73565.7
Q13823	GNL2	Nucleolar GTP-binding protein 2	73223.8
Q96IU4	ABHD14B	Protein ABHD14B	73194.3
P0DN79;P35520	CBSL;CBS	Cystathionine beta-synthase-like protein;Cystathionine beta-synthase	73101
P62140	PPP1CB	Serine/threonine-protein phosphatase PP1-beta catalytic subunit	73068
Q96EL2	MRPS24	28S ribosomal protein S24, mitochondrial	73049.8
Q8TDX7	NEK7	Serine/threonine-protein kinase Nek7	73020.9
P41743	PRKCI	Protein kinase C iota type	72775
P38606	ATP6V1A	V-type proton ATPase catalytic subunit A	72675.1
Q9HAV7	GRPEL1	GrpE protein homolog 1, mitochondrial	72665.7
Q9NUL3	STAU2	Double-stranded RNA-binding protein Staufen homolog 2	72475.2
P55795	HNRNPH2	Heterogeneous nuclear ribonucleoprotein H2	72389.5
O60518	RANBP6	Ran-binding protein 6	72370
Q99470	SDF2	Stromal cell-derived factor 2	72226
Q6Y7W6	GIGYF2	GRB10-interacting GYF protein 2	72163.5
Q6NTF9	RHBDD2	Rhomboid domain-containing protein 2	72041.1
Q9H0C8	ILKAP	Integrin-linked kinase-associated serine/threonine phosphatase 2C	71996.4
Q9HCE1	MOV10	Helicase MOV-10	71983.9
P45954	ACADSB	Short/branched chain specific acyl-CoA dehydrogenase, mitochondrial	71927.8
Q9BY32	ITPA	Inosine triphosphate pyrophosphatase	71926.6
P55884	EIF3B	Eukaryotic translation initiation factor 3 subunit B	71894.4
Q4G0J3	LARP7	La-related protein 7	71689.1
Q9UL25	RAB21	Ras-related protein Rab-21	71660.6
P14735	IDE	Insulin-degrading enzyme	71653.7
Q9BVK6	TMED9	Transmembrane emp24 domain-containing protein 9	71555.2
Q9Y450	HBS1L	HBS1-like protein	71458.8
P42771	CDKN2A	Cyclin-dependent kinase inhibitor 2A	71423.3
O95478	NSA2	Ribosome biogenesis protein NSA2 homolog	71375.5
P49756	RBM25	RNA-binding protein 25	71326.1
P78406	RAE1	mRNA export factor	71261.5
P03928	MT-ATP8	ATP synthase protein 8	71246.9
Q92879	CELF1	CUGBP Elav-like family member 1	71246.1
Q10469	MGAT2	Alpha-1,6-mannosyl-glycoprotein 2-beta-N-acetylglucosaminyltransferase	71216.4
P61923	COPZ1	Coatomer subunit zeta-1	71215.1
O75880	SCO1	Protein SCO1 homolog, mitochondrial	71139.5
Q9BYC5	FUT8	Alpha-(1,6)-fucosyltransferase	71074.9
O75122	CLASP2	CLIP-associating protein 2	71021.9
P08240	SRPRA	Signal recognition particle receptor subunit alpha	70911.1
O14545	TRAFD1	TRAF-type zinc finger domain-containing protein 1	70882.3
O95571	ETHE1	Persulfide dioxygenase ETHE1, mitochondrial	70680
Q96NB2	SFXN2	Sideroflexin-2	70600.1
Q9Y2S7	POLDIP2	Polymerase delta-interacting protein 2	70565
Q14315	FLNC	Filamin-C	70476.3
A6NDA9	LRIT2	Leucine-rich repeat, immunoglobulin-like domain and transmembrane domain-containing protein 2	70220.9
Q93063	EXT2	Exostosin-2	70204.3
O14733	MAP2K7	Dual specificity mitogen-activated protein kinase kinase 7	70182.3
Q8WWC4	MAIP1	m-AAA protease-interacting protein 1, mitochondrial	70054.4
Q15796	SMAD2	Mothers against decapentaplegic homolog 2	69926.9
Q96D46	NMD3	60S ribosomal export protein NMD3	69916.6
Q93034	CUL5	Cullin-5	69841
P60660	MYL6	Myosin light polypeptide 6	69824.8
P16298;Q08209	PPP3CB;PPP3CA	Serine/threonine-protein phosphatase 2B catalytic subunit beta isoform;Serine/threonine-protein phosphatase 2B catalytic subunit alpha isoform	69735.7
Q9BWF3	RBM4	RNA-binding protein 4	69731.8
Q15717	ELAVL1	ELAV-like protein 1	69618.4
Q9H814	PHAX	Phosphorylated adapter RNA export protein	69537.8
P48729	CSNK1A1	Casein kinase I isoform alpha	69518.6
Q4VCS5	AMOT	Angiomotin	69468.1
Q96JJ7	TMX3	Protein disulfide-isomerase TMX3	69445.9
P22830	FECH	Ferrochelatase, mitochondrial	69434
Q9UPT5	EXOC7	Exocyst complex component 7	69394.1
Q15369	ELOC	Elongin-C	69269.5
Q9BTY2	FUCA2	Plasma alpha-L-fucosidase	69208
Q92979	EMG1	Ribosomal RNA small subunit methyltransferase NEP1	69055.5
Q8IZH2	XRN1	5'-3' exoribonuclease 1	68900.3
Q9BRK5	SDF4	45 kDa calcium-binding protein	68846.8
Q7Z3U7	MON2	Protein MON2 homolog	68665.8
Q9UI12	ATP6V1H	V-type proton ATPase subunit H	68579.3
P11413	G6PD	Glucose-6-phosphate 1-dehydrogenase	68443.7
Q92791	P3H4	Endoplasmic reticulum protein SC65	68426.1
P56378	MP68	6.8 kDa mitochondrial proteolipid	68416.8
O60610	DIAPH1	Protein diaphanous homolog 1	68412.2
O43615	TIMM44	Mitochondrial import inner membrane translocase subunit TIM44	68383.2
Q9NU22	MDN1	Midasin	68222.7
P51970	NDUFA8	NADH dehydrogenase [ubiquinone] 1 alpha subcomplex subunit 8	68141.3
Q9NZB2	FAM120A	Constitutive coactivator of PPAR-gamma-like protein 1	67994.7
P26368	U2AF2	Splicing factor U2AF 65 kDa subunit	67993.5
Q6PI48	DARS2	Aspartate--tRNA ligase, mitochondrial	67900
P0C7P4;P47985	UQCRFS1P1;UQCRFS1	Putative cytochrome b-c1 complex subunit Rieske-like protein 1;Cytochrome b-c1 complex subunit Rieske, mitochondrial	67889.9
P46736	BRCC3	Lys-63-specific deubiquitinase BRCC36	67636.2
Q92900	UPF1	Regulator of nonsense transcripts 1	67634.1
Q9H6T3	RPAP3	RNA polymerase II-associated protein 3	67447.9
Q9NV70	EXOC1	Exocyst complex component 1	67447.7
Q13144	EIF2B5	Translation initiation factor eIF-2B subunit epsilon	67372
P62995	TRA2B	Transformer-2 protein homolog beta	67353.3
Q7L2J0	MEPCE	7SK snRNA methylphosphate capping enzyme	67305.6
Q6NZ67;Q6P582	MZT2B;MZT2A	Mitotic-spindle organizing protein 2B;Mitotic-spindle organizing protein 2A	67259.7
Q6PK04	CCDC137	Coiled-coil domain-containing protein 137	67133.5
Q8TAT6	NPLOC4	Nuclear protein localization protein 4 homolog	67079.4
P49674	CSNK1E	Casein kinase I isoform epsilon	67009.4
P60763	RAC3	Ras-related C3 botulinum toxin substrate 3	66822.3
Q96J42	TXNDC15	Thioredoxin domain-containing protein 15	66817.3
O43395	PRPF3	U4/U6 small nuclear ribonucleoprotein Prp3	66787.3
O00170	AIP	AH receptor-interacting protein	66775.9
Q01844	EWSR1	RNA-binding protein EWS	66690.6
Q8NHW5	RPLP0P6	60S acidic ribosomal protein P0-like	66687.5
Q9BRD0	BUD13	BUD13 homolog	66673.9
Q96A65	EXOC4	Exocyst complex component 4	66655.1
Q9Y680	FKBP7	Peptidyl-prolyl cis-trans isomerase FKBP7	66575.8
Q04760	GLO1	Lactoylglutathione lyase	66501
P13647	KRT5	Keratin, type II cytoskeletal 5	66408.3
Q8NBA8	DTWD2	DTW domain-containing protein 2	66277.5
P19388	POLR2E	DNA-directed RNA polymerases I, II, and III subunit RPABC1	66208.7
P35080	PFN2	Profilin-2	66196.5
P50750	CDK9	Cyclin-dependent kinase 9	66124.8
Q96KR1	ZFR	Zinc finger RNA-binding protein	66107.5
Q13555	CAMK2G	Calcium/calmodulin-dependent protein kinase type II subunit gamma	66099.2
P13861	PRKAR2A	cAMP-dependent protein kinase type II-alpha regulatory subunit	65927.2
Q5TAX3	TUT4	Terminal uridylyltransferase 4	65891
P04004	VTN	Vitronectin	65810
Q15427	SF3B4	Splicing factor 3B subunit 4	65714.5
Q9Y6D0	SELENOK	Selenoprotein K	65700
Q8WVM0	TFB1M	Dimethyladenosine transferase 1, mitochondrial	65659.7
P17066	HSPA6	Heat shock 70 kDa protein 6	65553.6
Q9BXW9	FANCD2	Fanconi anemia group D2 protein	65514.3
Q07021	C1QBP	Complement component 1 Q subcomponent-binding protein, mitochondrial	65506.9
Q9NTZ6	RBM12	RNA-binding protein 12	65455.5
Q6ZRP7	QSOX2	Sulfhydryl oxidase 2	65425.9
Q96KC8	DNAJC1	DnaJ homolog subfamily C member 1	65382.5
Q13049	TRIM32	E3 ubiquitin-protein ligase TRIM32	65361.3
Q13813	SPTAN1	Spectrin alpha chain, non-erythrocytic 1	65214
Q9GZP9	DERL2	Derlin-2	65191.5
P04075	ALDOA	Fructose-bisphosphate aldolase A	65145.1
P30260	CDC27	Cell division cycle protein 27 homolog	64777.1
P51617	IRAK1	Interleukin-1 receptor-associated kinase 1	64752.5
Q9P2K3	RCOR3	REST corepressor 3	64746.5
Q8N5L8	RPP25L	Ribonuclease P protein subunit p25-like protein	64470.4
P49790	NUP153	Nuclear pore complex protein Nup153	64468.2
P27361	MAPK3	Mitogen-activated protein kinase 3	64434.4
P28799	GRN	Progranulin	64328.9
Q01650	SLC7A5	Large neutral amino acids transporter small subunit 1	64192.2
Q9H8H2	DDX31	Probable ATP-dependent RNA helicase DDX31	64151.9
Q9UNZ5	C19orf53	Leydig cell tumor 10 kDa protein homolog	64149.2
O75489	NDUFS3	NADH dehydrogenase [ubiquinone] iron-sulfur protein 3, mitochondrial	64061.1
O75131	CPNE3	Copine-3	64032.9
Q7Z4H3	HDDC2	HD domain-containing protein 2	64000.3
Q9NWU5	MRPL22	39S ribosomal protein L22, mitochondrial	63979
P78345	RPP38	Ribonuclease P protein subunit p38	63962.6
P04792	HSPB1	Heat shock protein beta-1	63925.7
O95352	ATG7	Ubiquitin-like modifier-activating enzyme ATG7	63852.4
Q96QR8	PURB	Transcriptional activator protein Pur-beta	63784.2
Q9UMX5	NENF	Neudesin	63752.7
Q5SRE5	NUP188	Nucleoporin NUP188 homolog	63424.8
P35556	FBN2	Fibrillin-2	63346.2
P14635	CCNB1	G2/mitotic-specific cyclin-B1	63136
O43583	DENR	Density-regulated protein	63123.4
O75663	TIPRL	TIP41-like protein	63006.6
Q96QU8	XPO6	Exportin-6	62984.7
Q9HC21	SLC25A19	Mitochondrial thiamine pyrophosphate carrier	62854.1
P11047	LAMC1	Laminin subunit gamma-1	62753.3
Q9P0J0	NDUFA13	NADH dehydrogenase [ubiquinone] 1 alpha subcomplex subunit 13	62746
P56385	ATP5ME	ATP synthase subunit e, mitochondrial	62734.4
Q9Y676	MRPS18B	28S ribosomal protein S18b, mitochondrial	62219.3
Q13085	ACACA	Acetyl-CoA carboxylase 1	62131.1
Q9BZF1	OSBPL8	Oxysterol-binding protein-related protein 8	62116.1
P35237	SERPINB6	Serpin B6	62090.3
Q16527	CSRP2	Cysteine and glycine-rich protein 2	62057.5
Q9Y6A4	CFAP20	Cilia- and flagella-associated protein 20	61910.3
Q9ULX6	AKAP8L	A-kinase anchor protein 8-like	61746.6
Q9NZV5	SELENON	Selenoprotein N	61606.2
Q9UQE7	SMC3	Structural maintenance of chromosomes protein 3	61590.4
Q9UNX3	RPL26L1	60S ribosomal protein L26-like 1	61479.3
Q6UXV4	APOOL	MICOS complex subunit MIC27	61396.4
Q9H4I3	TRABD	TraB domain-containing protein	61335.6
Q9HA64	FN3KRP	Ketosamine-3-kinase	61293.6
P23193	TCEA1	Transcription elongation factor A protein 1	61149.3
Q9H857	NT5DC2	5'-nucleotidase domain-containing protein 2	61107.4
P0DP01	IGHV1-8	Immunoglobulin heavy variable 1-8	61081.6
Q9NV96	TMEM30A	Cell cycle control protein 50A	60998
Q9UKV5	AMFR	E3 ubiquitin-protein ligase AMFR	60996.1
Q8WXB1	METTL21A	Protein N-lysine methyltransferase METTL21A	60880.8
Q9UL15	BAG5	BAG family molecular chaperone regulator 5	60848.3
Q9ULX3	NOB1	RNA-binding protein NOB1	60764.3
P61221	ABCE1	ATP-binding cassette sub-family E member 1	60500.6
Q13601	KRR1	KRR1 small subunit processome component homolog	60479.8
Q8IXI1	RHOT2	Mitochondrial Rho GTPase 2	60473.5
Q9NWT8	AURKAIP1	Aurora kinase A-interacting protein	60375.3
Q9Y3C6	PPIL1	Peptidyl-prolyl cis-trans isomerase-like 1	60371
Q9NR77	PXMP2	Peroxisomal membrane protein 2	60284.8
Q5SRI9	MANEA	Glycoprotein endo-alpha-1,2-mannosidase	60282.1
Q96FZ2	HMCES	Embryonic stem cell-specific 5-hydroxymethylcytosine-binding protein	60219.3
Q15020	SART3	Squamous cell carcinoma antigen recognized by T-cells 3	60192.8
O95197	RTN3	Reticulon-3	60134.3
Q99653	CHP1	Calcineurin B homologous protein 1	60115.4
O15397	IPO8	Importin-8	59956.8
O95707	POP4	Ribonuclease P protein subunit p29	59865.2
P56545	CTBP2	C-terminal-binding protein 2	59850.1
Q16342	PDCD2	Programmed cell death protein 2	59847.2
P61964	WDR5	WD repeat-containing protein 5	59834.9
Q8N2K0	ABHD12	Monoacylglycerol lipase ABHD12	59627.9
Q15392	DHCR24	Delta(24)-sterol reductase	59532.1
P06899;P23527;P33778;Q16778	HIST1H2BJ;HIST1H2BO;HIST1H2BB;HIST2H2BE	Histone H2B type 1-J;Histone H2B type 1-O;Histone H2B type 1-B;Histone H2B type 2-E	59430.8
O75694	NUP155	Nuclear pore complex protein Nup155	59428.1
Q9UJX3	ANAPC7	Anaphase-promoting complex subunit 7	59275.5
Q96KA5	CLPTM1L	Cleft lip and palate transmembrane protein 1-like protein	59244.3
P22695	UQCRC2	Cytochrome b-c1 complex subunit 2, mitochondrial	59210.6
P48735	IDH2	Isocitrate dehydrogenase [NADP], mitochondrial	59103.1
P14209	CD99	CD99 antigen	59025.8
O43502	RAD51C	DNA repair protein RAD51 homolog 3	59009.3
P30837	ALDH1B1	Aldehyde dehydrogenase X, mitochondrial	58995.6
O95782	AP2A1	AP-2 complex subunit alpha-1	58786.2
Q969X5	ERGIC1	Endoplasmic reticulum-Golgi intermediate compartment protein 1	58751.8
O43765	SGTA	Small glutamine-rich tetratricopeptide repeat-containing protein alpha	58674.7
Q02218	OGDH	2-oxoglutarate dehydrogenase, mitochondrial	58670.1
O95248	SBF1	Myotubularin-related protein 5	58664.9
P00751	CFB	Complement factor B	58623.2
Q8IUF8	RIOX2	Ribosomal oxygenase 2	58529.6
Q8NBP0	TTC13	Tetratricopeptide repeat protein 13	58528.5
Q9HCC0	MCCC2	Methylcrotonoyl-CoA carboxylase beta chain, mitochondrial	58475.6
O75718	CRTAP	Cartilage-associated protein	58425.9
Q6NXE6	ARMC6	Armadillo repeat-containing protein 6	58357
Q9Y5P6	GMPPB	Mannose-1-phosphate guanyltransferase beta	58315.6
Q9NXS2	QPCTL	Glutaminyl-peptide cyclotransferase-like protein	58304.8
P49588	AARS	Alanine--tRNA ligase, cytoplasmic	58303.8
P61163	ACTR1A	Alpha-centractin	58283.8
Q8N684	CPSF7	Cleavage and polyadenylation specificity factor subunit 7	58272.3
A3KMH1	VWA8	von Willebrand factor A domain-containing protein 8	58222.9
P42345	MTOR	Serine/threonine-protein kinase mTOR	58189.5
Q9BXJ9	NAA15	N-alpha-acetyltransferase 15, NatA auxiliary subunit	58142.2
O95470	SGPL1	Sphingosine-1-phosphate lyase 1	58127.5
Q96LU5	IMMP1L	Mitochondrial inner membrane protease subunit 1	58113.8
O14757	CHEK1	Serine/threonine-protein kinase Chk1	58097.8
Q9NR56	MBNL1	Muscleblind-like protein 1	58094.1
Q92604	LPGAT1	Acyl-CoA:lysophosphatidylglycerol acyltransferase 1	58025
Q8WUJ1	CYB5D2	Neuferricin	57875.2
P0DP23;P0DP24;P0DP25	CALM1;CALM2;CALM3	Calmodulin-1;Calmodulin-2;Calmodulin-3	57773.4
Q08945	SSRP1	FACT complex subunit SSRP1	57718.2
Q86X83	COMMD2	COMM domain-containing protein 2	57622.6
P49005	POLD2	DNA polymerase delta subunit 2	57605.5
Q8N6R0	EEF1AKNMT	eEF1A lysine and N-terminal methyltransferase	57601
Q9H4I9	SMDT1	Essential MCU regulator, mitochondrial	57591.2
Q9UL18	AGO1	Protein argonaute-1	57582.8
Q9BW19	KIFC1	Kinesin-like protein KIFC1	57499.1
P50502	ST13	Hsc70-interacting protein	57394
O60238	BNIP3L	BCL2/adenovirus E1B 19 kDa protein-interacting protein 3-like	57362.9
P17152	TMEM11	Transmembrane protein 11, mitochondrial	57239.8
Q9BWH6	RPAP1	RNA polymerase II-associated protein 1	57135.7
Q969S3	ZNF622	Zinc finger protein 622	57012.6
O60831	PRAF2	PRA1 family protein 2	56851.1
P19474	TRIM21	E3 ubiquitin-protein ligase TRIM21	56847.8
P52815	MRPL12	39S ribosomal protein L12, mitochondrial	56749
P23258;Q9NRH3	TUBG1;TUBG2	Tubulin gamma-1 chain;Tubulin gamma-2 chain	56616
P30825	SLC7A1	High affinity cationic amino acid transporter 1	56518.2
Q96GP6	SCARF2	Scavenger receptor class F member 2	56492.9
O94874	UFL1	E3 UFM1-protein ligase 1	56476.5
Q9NWV8	BABAM1	BRISC and BRCA1-A complex member 1	56354.3
P46976	GYG1	Glycogenin-1	56329.6
A6NHL2	TUBAL3	Tubulin alpha chain-like 3	56295.3
P62736;P63267;P68032;P68133	ACTA2;ACTG2;ACTC1;ACTA1	Actin, aortic smooth muscle;Actin, gamma-enteric smooth muscle;Actin, alpha cardiac muscle 1;Actin, alpha skeletal muscle	56279.2
O60942	RNGTT	mRNA-capping enzyme	56242.9
Q8NE01	CNNM3	Metal transporter CNNM3	56056.3
O75436	VPS26A	Vacuolar protein sorting-associated protein 26A	56020.4
Q9UID3	VPS51	Vacuolar protein sorting-associated protein 51 homolog	56014.3
Q9Y2P8	RCL1	RNA 3'-terminal phosphate cyclase-like protein	55965.2
Q13409	DYNC1I2	Cytoplasmic dynein 1 intermediate chain 2	55953.9
A0A0B4J1V1;P01762;P01763;P01780	IGHV3-21;IGHV3-11;IGHV3-48;IGHV3-7	Immunoglobulin heavy variable 3-21;Immunoglobulin heavy variable 3-11;Immunoglobulin heavy variable 3-48;Immunoglobulin heavy variable 3-7	55890.1
Q12874	SF3A3	Splicing factor 3A subunit 3	55832.7
Q15014	MORF4L2	Mortality factor 4-like protein 2	55724.3
Q14137	BOP1	Ribosome biogenesis protein BOP1	55722.3
Q9UK59	DBR1	Lariat debranching enzyme	55500.6
Q99873	PRMT1	Protein arginine N-methyltransferase 1	55460.1
Q9NX00	TMEM160	Transmembrane protein 160	55443.8
Q96CX2	KCTD12	BTB/POZ domain-containing protein KCTD12	55435.1
Q96CW5	TUBGCP3	Gamma-tubulin complex component 3	55393.6
Q9Y5X3	SNX5	Sorting nexin-5	55308.7
Q5JTZ9	AARS2	Alanine--tRNA ligase, mitochondrial	55295.2
Q9H2P0	ADNP	Activity-dependent neuroprotector homeobox protein	55287.4
Q06787	FMR1	Synaptic functional regulator FMR1	55278
O15160	POLR1C	DNA-directed RNA polymerases I and III subunit RPAC1	55276.3
P42785	PRCP	Lysosomal Pro-X carboxypeptidase	55151.2
Q13838	DDX39B	Spliceosome RNA helicase DDX39B	55133.1
P05556	ITGB1	Integrin beta-1	55120.4
P51114	FXR1	Fragile X mental retardation syndrome-related protein 1	55023.2
P46734	MAP2K3	Dual specificity mitogen-activated protein kinase kinase 3	54982.1
Q9NVT9	ARMC1	Armadillo repeat-containing protein 1	54930.1
P51659	HSD17B4	Peroxisomal multifunctional enzyme type 2	54893.5
Q96T76	MMS19	MMS19 nucleotide excision repair protein homolog	54799.8
Q92692	NECTIN2	Nectin-2	54676
O00233	PSMD9	26S proteasome non-ATPase regulatory subunit 9	54636.6
Q9NTX5	ECHDC1	Ethylmalonyl-CoA decarboxylase	54599.7
Q8IXQ3	C9orf40	Uncharacterized protein C9orf40	54566.2
Q9UG56	PISD	Phosphatidylserine decarboxylase proenzyme, mitochondrial	54502.6
P04080	CSTB	Cystatin-B	54478.9
Q13363	CTBP1	C-terminal-binding protein 1	54456.5
Q5VUJ6	LRCH2	Leucine-rich repeat and calponin homology domain-containing protein 2	54417
P29353	SHC1	SHC-transforming protein 1	54366.7
P56937	HSD17B7	3-keto-steroid reductase	54354.8
Q7L0Y3	TRMT10C	tRNA methyltransferase 10 homolog C	54337.4
Q12788	TBL3	Transducin beta-like protein 3	54262.1
P18031	PTPN1	Tyrosine-protein phosphatase non-receptor type 1	54251.3
Q9BQ70	TCF25	Transcription factor 25	54250.9
P26358	DNMT1	DNA (cytosine-5)-methyltransferase 1	54230.3
Q6UW63	KDELC1	Protein O-glucosyltransferase 2	54174.7
P21796	VDAC1	Voltage-dependent anion-selective channel protein 1	54158.8
Q9UI30	TRMT112	Multifunctional methyltransferase subunit TRM112-like protein	54158.4
P31327	CPS1	Carbamoyl-phosphate synthase [ammonia], mitochondrial	54131.6
Q96PU8	QKI	Protein quaking	54103.2
O60704	TPST2	Protein-tyrosine sulfotransferase 2	53968.6
Q9BTE7	DCUN1D5	DCN1-like protein 5	53964.6
Q9NS86	LANCL2	LanC-like protein 2	53897.5
P16152	CBR1	Carbonyl reductase [NADPH] 1	53881.7
Q9H813	TMEM206	Transmembrane protein 206	53858.5
Q9NVN8	GNL3L	Guanine nucleotide-binding protein-like 3-like protein	53812.8
Q9P2E9	RRBP1	Ribosome-binding protein 1	53706.9
Q9NY12	GAR1	H/ACA ribonucleoprotein complex subunit 1	53692.3
Q16698	DECR1	2,4-dienoyl-CoA reductase, mitochondrial	53597
Q13427	PPIG	Peptidyl-prolyl cis-trans isomerase G	53584.8
P12270	TPR	Nucleoprotein TPR	53503.1
P46459	NSF	Vesicle-fusing ATPase	53500.5
P15735	PHKG2	Phosphorylase b kinase gamma catalytic chain, liver/testis isoform	53464.8
Q8WVD3	RNF138	E3 ubiquitin-protein ligase RNF138	53452.8
Q9P2R7	SUCLA2	Succinate--CoA ligase [ADP-forming] subunit beta, mitochondrial	53418.4
O43813	LANCL1	Glutathione S-transferase LANCL1	53413.9
Q6P3X3	TTC27	Tetratricopeptide repeat protein 27	53338.9
P02746	C1QB	Complement C1q subcomponent subunit B	53329.3
P08574	CYC1	Cytochrome c1, heme protein, mitochondrial	53327.1
H0YL14	TMEM250	Transmembrane protein 250	53232.6
Q01082	SPTBN1	Spectrin beta chain, non-erythrocytic 1	53053.7
P54646	PRKAA2	5'-AMP-activated protein kinase catalytic subunit alpha-2	53052.5
O75146	HIP1R	Huntingtin-interacting protein 1-related protein	53024.9
Q99829	CPNE1	Copine-1	52921.2
Q14157	UBAP2L	Ubiquitin-associated protein 2-like	52806.8
Q9Y673	ALG5	Dolichyl-phosphate beta-glucosyltransferase	52603.3
Q9NQW6	ANLN	Anillin	52539.1
Q9UDR5	AASS	Alpha-aminoadipic semialdehyde synthase, mitochondrial	52477
Q15637	SF1	Splicing factor 1	52351.5
Q7L5L3	GDPD3	Lysophospholipase D GDPD3	52307.3
Q9BVG9	PTDSS2	Phosphatidylserine synthase 2	52277.9
Q9Y2Q9	MRPS28	28S ribosomal protein S28, mitochondrial	52276.6
Q9Y2I1	NISCH	Nischarin	52206.6
Q9BVG4	PBDC1	Protein PBDC1	52018.8
Q5VUD6	DIPK1B	Divergent protein kinase domain 1B	52018.7
Q96L92	SNX27	Sorting nexin-27	51946
O43896;O60333;Q12756	KIF1C;KIF1B;KIF1A	Kinesin-like protein KIF1C;Kinesin-like protein KIF1B;Kinesin-like protein KIF1A	51934.8
Q9H1D9	POLR3F	DNA-directed RNA polymerase III subunit RPC6	51838.9
Q9NX61	TMEM161A	Transmembrane protein 161A	51799.9
Q6TFL3	CCDC171	Coiled-coil domain-containing protein 171	51775.5
Q9Y4W2	LAS1L	Ribosomal biogenesis protein LAS1L	51758
P62834	RAP1A	Ras-related protein Rap-1A	51697.3
Q96MH6	TMEM68	Transmembrane protein 68	51679.6
Q9BXS4	TMEM59	Transmembrane protein 59	51630.7
Q7Z7H5	TMED4	Transmembrane emp24 domain-containing protein 4	51611.1
Q16891	IMMT	MICOS complex subunit MIC60	51513.5
Q86TB9	PATL1	Protein PAT1 homolog 1	51376
Q9BV44	THUMPD3	THUMP domain-containing protein 3	51285.6
Q14244	MAP7	Ensconsin	51270.1
O95059	RPP14	Ribonuclease P protein subunit p14	51265.6
P12109	COL6A1	Collagen alpha-1(VI) chain	51243.5
Q92643	PIGK	GPI-anchor transamidase	51222.1
Q9BTT6	LRRC1	Leucine-rich repeat-containing protein 1	51173
P04183	TK1	Thymidine kinase, cytosolic	51118
Q13445	TMED1	Transmembrane emp24 domain-containing protein 1	51101.3
P60510	PPP4C	Serine/threonine-protein phosphatase 4 catalytic subunit	51084.9
A6NDG6	PGP	Glycerol-3-phosphate phosphatase	50968.2
Q7Z2W9	MRPL21	39S ribosomal protein L21, mitochondrial	50798.6
Q8IWX8	CHERP	Calcium homeostasis endoplasmic reticulum protein	50654.8
O15371	EIF3D	Eukaryotic translation initiation factor 3 subunit D	50568.7
Q5T440	IBA57	Putative transferase CAF17, mitochondrial	50508.7
Q709F0	ACAD11	Acyl-CoA dehydrogenase family member 11	50506.5
Q13642	FHL1	Four and a half LIM domains protein 1	50496.7
Q9UHD9	UBQLN2	Ubiquilin-2	50425.8
Q9NS69	TOMM22	Mitochondrial import receptor subunit TOM22 homolog	50420.7
Q5VWQ0	RSBN1	Lysine-specific demethylase 9	50389.6
Q7Z4R8	C6orf120	UPF0669 protein C6orf120	50337.1
Q14683	SMC1A	Structural maintenance of chromosomes protein 1A	50161
P23142	FBLN1	Fibulin-1	50138.3
Q9NRX1	PNO1	RNA-binding protein PNO1	50057.9
Q9NWM8	FKBP14	Peptidyl-prolyl cis-trans isomerase FKBP14	49975.1
Q8IZV5	RDH10	Retinol dehydrogenase 10	49911
P38935	IGHMBP2	DNA-binding protein SMUBP-2	49823.4
P82921	MRPS21	28S ribosomal protein S21, mitochondrial	49798.9
O60613	SELENOF	Selenoprotein F	49797.4
Q9Y3D9	MRPS23	28S ribosomal protein S23, mitochondrial	49763.7
Q1ED39	KNOP1	Lysine-rich nucleolar protein 1	49754.2
Q15650	TRIP4	Activating signal cointegrator 1	49718.8
Q5JPH6	EARS2	Probable glutamate--tRNA ligase, mitochondrial	49683.5
O15446	CD3EAP	DNA-directed RNA polymerase I subunit RPA34	49623.7
Q9Y3T9	NOC2L	Nucleolar complex protein 2 homolog	49587
Q86WX3	RPS19BP1	Active regulator of SIRT1	49580.2
Q9NPJ8;Q9UKK6	NXT2;NXT1	NTF2-related export protein 2;NTF2-related export protein 1	49520.9
Q9Y4E8	USP15	Ubiquitin carboxyl-terminal hydrolase 15	49495.6
Q86W50	METTL16	RNA N6-adenosine-methyltransferase METTL16	49468
O75153	CLUH	Clustered mitochondria protein homolog	49448.4
Q9Y266	NUDC	Nuclear migration protein nudC	49413
P67775	PPP2CA	Serine/threonine-protein phosphatase 2A catalytic subunit alpha isoform	49375.1
Q9Y5Q8	GTF3C5	General transcription factor 3C polypeptide 5	49347.8
Q9NPL8	TIMMDC1	Complex I assembly factor TIMMDC1, mitochondrial	49324.3
Q92820	GGH	Gamma-glutamyl hydrolase	49213.4
P15170	GSPT1	Eukaryotic peptide chain release factor GTP-binding subunit ERF3A	49175.9
P24539	ATP5PB	ATP synthase F(0) complex subunit B1, mitochondrial	49144.7
Q9Y3P4	RHBDD3	Rhomboid domain-containing protein 3	49107
Q7Z478	DHX29	ATP-dependent RNA helicase DHX29	49043
Q9NP64	ZCCHC17	Nucleolar protein of 40 kDa	48944.8
P86790;P86791	CCZ1B;CCZ1	Vacuolar fusion protein CCZ1 homolog B;Vacuolar fusion protein CCZ1 homolog	48932.2
P56537	EIF6	Eukaryotic translation initiation factor 6	48918.1
P51692	STAT5B	Signal transducer and activator of transcription 5B	48764.7
Q99614	TTC1	Tetratricopeptide repeat protein 1	48746.5
O75352	MPDU1	Mannose-P-dolichol utilization defect 1 protein	48714.9
P11310	ACADM	Medium-chain specific acyl-CoA dehydrogenase, mitochondrial	48684.8
P40763	STAT3	Signal transducer and activator of transcription 3	48675.1
Q9ULC4	MCTS1	Malignant T-cell-amplified sequence 1	48575.9
Q9NWZ5	UCKL1	Uridine-cytidine kinase-like 1	48529.7
O00330	PDHX	Pyruvate dehydrogenase protein X component, mitochondrial	48514.8
O75179	ANKRD17	Ankyrin repeat domain-containing protein 17	48498.6
Q9Y5B6	PAXBP1	PAX3- and PAX7-binding protein 1	48412.8
P47756	CAPZB	F-actin-capping protein subunit beta	48368.1
Q5JRA6	MIA3	Transport and Golgi organization protein 1 homolog	48170.4
O43759	SYNGR1	Synaptogyrin-1	48083.3
O43837	IDH3B	Isocitrate dehydrogenase [NAD] subunit beta, mitochondrial	47975.1
Q9BXW7	HDHD5	Haloacid dehalogenase-like hydrolase domain-containing 5	47952.1
Q9NYC9;Q9UFH2	DNAH9;DNAH17	Dynein heavy chain 9, axonemal;Dynein heavy chain 17, axonemal	47943.5
O94992	HEXIM1	Protein HEXIM1	47929
P11166	SLC2A1	Solute carrier family 2, facilitated glucose transporter member 1	47882.7
O15173	PGRMC2	Membrane-associated progesterone receptor component 2	47864.4
P33176	KIF5B	Kinesin-1 heavy chain	47862.1
P41214	EIF2D	Eukaryotic translation initiation factor 2D	47637
Q99661	KIF2C	Kinesin-like protein KIF2C	47631.3
Q8WWY3	PRPF31	U4/U6 small nuclear ribonucleoprotein Prp31	47604.1
P61026	RAB10	Ras-related protein Rab-10	47582.9
Q8WUH6	TMEM263	Transmembrane protein 263	47576.9
Q92734	TFG	Protein TFG	47564.8
O60341	KDM1A	Lysine-specific histone demethylase 1A	47514.2
P26640	VARS	Valine--tRNA ligase	47473.3
Q9UBB6	NCDN	Neurochondrin	47413.1
A0PJW6	TMEM223	Transmembrane protein 223	47347.7
Q9ULA0	DNPEP	Aspartyl aminopeptidase	47272.1
Q9Y2W6	TDRKH	Tudor and KH domain-containing protein	47212.1
P04632	CAPNS1	Calpain small subunit 1	47177.4
O75477	ERLIN1	Erlin-1	47162
Q9H7D7	WDR26	WD repeat-containing protein 26	47157.7
Q6UVY6	MOXD1	DBH-like monooxygenase protein 1	47100.6
Q9Y6J9	TAF6L	TAF6-like RNA polymerase II p300/CBP-associated factor-associated factor 65 kDa subunit 6L	47058.3
Q8N766	EMC1	ER membrane protein complex subunit 1	46989.7
P06730	EIF4E	Eukaryotic translation initiation factor 4E	46939.9
O14787	TNPO2	Transportin-2	46848.8
Q5T1V6	DDX59	Probable ATP-dependent RNA helicase DDX59	46812.5
O75419	CDC45	Cell division control protein 45 homolog	46727.1
Q9GZL7	WDR12	Ribosome biogenesis protein WDR12	46706.8
O14737	PDCD5	Programmed cell death protein 5	46694
O15067	PFAS	Phosphoribosylformylglycinamidine synthase	46543.8
Q8TC12	RDH11	Retinol dehydrogenase 11	46480.1
O00258	WRB	Tail-anchored protein insertion receptor WRB	46446.7
Q9Y2D4	EXOC6B	Exocyst complex component 6B	46418.7
Q9Y324	FCF1	rRNA-processing protein FCF1 homolog	46236.2
Q9NVH1	DNAJC11	DnaJ homolog subfamily C member 11	46187.4
Q8N4L8	CCDC24	Coiled-coil domain-containing protein 24	46059.8
Q8IWV7	UBR1	E3 ubiquitin-protein ligase UBR1	45961
Q99805	TM9SF2	Transmembrane 9 superfamily member 2	45953.5
Q99442	SEC62	Translocation protein SEC62	45934.2
Q52LJ0	FAM98B	Protein FAM98B	45916.4
P01033	TIMP1	Metalloproteinase inhibitor 1	45903.2
P61758	VBP1	Prefoldin subunit 3	45887.3
Q9UQ80	PA2G4	Proliferation-associated protein 2G4	45852.5
Q9P2K5	MYEF2	Myelin expression factor 2	45846.6
Q99961	SH3GL1	Endophilin-A2	45836.5
Q9H5Q4	TFB2M	Dimethyladenosine transferase 2, mitochondrial	45677.4
E9PAV3;Q13765	NACA	Nascent polypeptide-associated complex subunit alpha, muscle-specific form;Nascent polypeptide-associated complex subunit alpha	45641.5
Q9UBV8	PEF1	Peflin	45621.1
O60749	SNX2	Sorting nexin-2	45594.8
Q5C9Z4	NOM1	Nucleolar MIF4G domain-containing protein 1	45510.1
Q9HD42	CHMP1A	Charged multivesicular body protein 1a	45507.8
Q15648	MED1	Mediator of RNA polymerase II transcription subunit 1	45459.3
P11274	BCR	Breakpoint cluster region protein	45383.1
Q9HD33	MRPL47	39S ribosomal protein L47, mitochondrial	45331.6
Q6PGP7	TTC37	Tetratricopeptide repeat protein 37	45273.5
Q86UL3	GPAT4	Glycerol-3-phosphate acyltransferase 4	45249.9
P35579	MYH9	Myosin-9	45181
Q9Y2X3	NOP58	Nucleolar protein 58	45133.4
Q9BV38	WDR18	WD repeat-containing protein 18	45132.5
Q6UXN9	WDR82	WD repeat-containing protein 82	45113.2
P55145	MANF	Mesencephalic astrocyte-derived neurotrophic factor	45091.4
Q06203	PPAT	Amidophosphoribosyltransferase	45001.2
P24468	NR2F2	COUP transcription factor 2	44990.3
Q7Z4G4	TRMT11	tRNA (guanine(10)-N2)-methyltransferase homolog	44943.1
P29122	PCSK6	Proprotein convertase subtilisin/kexin type 6	44875.9
P13073	COX4I1	Cytochrome c oxidase subunit 4 isoform 1, mitochondrial	44848.8
Q9H845	ACAD9	Acyl-CoA dehydrogenase family member 9, mitochondrial	44795.9
P06753;P07951;P09493;P67936	TPM3;TPM2;TPM1;TPM4	Tropomyosin alpha-3 chain;Tropomyosin beta chain;Tropomyosin alpha-1 chain;Tropomyosin alpha-4 chain	44790.6
Q9H7B4	SMYD3	Histone-lysine N-methyltransferase SMYD3	44728.2
Q96SB8	SMC6	Structural maintenance of chromosomes protein 6	44715.1
Q96ME7	ZNF512	Zinc finger protein 512	44695.6
P60604	UBE2G2	Ubiquitin-conjugating enzyme E2 G2	44598.5
Q10567	AP1B1	AP-1 complex subunit beta-1	44572.6
O14773	TPP1	Tripeptidyl-peptidase 1	44550
Q9NWT1	PAK1IP1	p21-activated protein kinase-interacting protein 1	44491.8
Q9UGR2	ZC3H7B	Zinc finger CCCH domain-containing protein 7B	44457
P62987	UBA52	Ubiquitin-60S ribosomal protein L40	44428.8
O75175	CNOT3	CCR4-NOT transcription complex subunit 3	44368.5
Q9NVH0	EXD2	Exonuclease 3'-5' domain-containing protein 2	44355.4
P20700	LMNB1	Lamin-B1	44354.3
O15031	PLXNB2	Plexin-B2	44344.5
Q92729	PTPRU	Receptor-type tyrosine-protein phosphatase U	44228.3
O75683	SURF6	Surfeit locus protein 6	44204.9
Q9NPF4	OSGEP	Probable tRNA N6-adenosine threonylcarbamoyltransferase	44089.7
P82663	MRPS25	28S ribosomal protein S25, mitochondrial	44050.1
Q05086	UBE3A	Ubiquitin-protein ligase E3A	44026.4
Q9BVI4	NOC4L	Nucleolar complex protein 4 homolog	44007.9
Q9NW08	POLR3B	DNA-directed RNA polymerase III subunit RPC2	43948.9
P48047	ATP5PO	ATP synthase subunit O, mitochondrial	43933.9
Q9Y5L4	TIMM13	Mitochondrial import inner membrane translocase subunit Tim13	43929.8
Q15397	PUM3	Pumilio homolog 3	43868.7
O60264	SMARCA5	SWI/SNF-related matrix-associated actin-dependent regulator of chromatin subfamily A member 5	43858.2
Q9BYN8	MRPS26	28S ribosomal protein S26, mitochondrial	43827.1
Q8IY18	SMC5	Structural maintenance of chromosomes protein 5	43750.5
Q15345	LRRC41	Leucine-rich repeat-containing protein 41	43729.1
P12277	CKB	Creatine kinase B-type	43709.4
P30049	ATP5F1D	ATP synthase subunit delta, mitochondrial	43606.3
Q8NBF2	NHLRC2	NHL repeat-containing protein 2	43581.5
Q12894	IFRD2	Interferon-related developmental regulator 2	43563.8
Q6ZN17	LIN28B	Protein lin-28 homolog B	43560.2
Q5T160	RARS2	Probable arginine--tRNA ligase, mitochondrial	43506.8
P61081	UBE2M	NEDD8-conjugating enzyme Ubc12	43499.8
Q9Y5L0	TNPO3	Transportin-3	43490.9
Q68CQ7	GLT8D1	Glycosyltransferase 8 domain-containing protein 1	43414
Q9NUQ2	AGPAT5	1-acyl-sn-glycerol-3-phosphate acyltransferase epsilon	43388.2
P51553	IDH3G	Isocitrate dehydrogenase [NAD] subunit gamma, mitochondrial	43384.4
Q96EX3	WDR34	WD repeat-containing protein 34	43331.6
O00303	EIF3F	Eukaryotic translation initiation factor 3 subunit F	43276.4
Q96AB3	ISOC2	Isochorismatase domain-containing protein 2	43248.4
P36957	DLST	Dihydrolipoyllysine-residue succinyltransferase component of 2-oxoglutarate dehydrogenase complex, mitochondrial	43239.3
O43913	ORC5	Origin recognition complex subunit 5	43194.9
Q8WVV9	HNRNPLL	Heterogeneous nuclear ribonucleoprotein L-like	43137.8
Q6AI08	HEATR6	HEAT repeat-containing protein 6	43118.4
O75027	ABCB7	ATP-binding cassette sub-family B member 7, mitochondrial	43063.1
Q9Y2W1	THRAP3	Thyroid hormone receptor-associated protein 3	42966.7
P78318	IGBP1	Immunoglobulin-binding protein 1	42895.5
P04049	RAF1	RAF proto-oncogene serine/threonine-protein kinase	42887
O94973	AP2A2	AP-2 complex subunit alpha-2	42837.9
Q96S52	PIGS	GPI transamidase component PIG-S	42663.2
Q92896	GLG1	Golgi apparatus protein 1	42644.4
P45877	PPIC	Peptidyl-prolyl cis-trans isomerase C	42631
P52907	CAPZA1	F-actin-capping protein subunit alpha-1	42630.5
Q9UN81	L1RE1	LINE-1 retrotransposable element ORF1 protein	42629.6
Q6P1L8	MRPL14	39S ribosomal protein L14, mitochondrial	42614.6
Q9UK99	FBXO3	F-box only protein 3	42554.3
Q15334	LLGL1	Lethal(2) giant larvae protein homolog 1	42524.7
O14732	IMPA2	Inositol monophosphatase 2	42424.4
Q9UJX5	ANAPC4	Anaphase-promoting complex subunit 4	42405
Q6ZNB6	NFXL1	NF-X1-type zinc finger protein NFXL1	42383.3
Q9GZT9	EGLN1	Egl nine homolog 1	42382.3
Q9NX76	CMTM6	CKLF-like MARVEL transmembrane domain-containing protein 6	42349.7
Q8IXM3	MRPL41	39S ribosomal protein L41, mitochondrial	42340.9
P30044	PRDX5	Peroxiredoxin-5, mitochondrial	42312.3
Q96C57	CUSTOS	Protein CUSTOS	42309.5
Q15654	TRIP6	Thyroid receptor-interacting protein 6	42234.4
Q8WVB6	CHTF18	Chromosome transmission fidelity protein 18 homolog	42226
Q14232	EIF2B1	Translation initiation factor eIF-2B subunit alpha	42219.2
Q9P0T7	TMEM9	Transmembrane protein 9	42217
Q9BRR6	ADPGK	ADP-dependent glucokinase	42196
P49321	NASP	Nuclear autoantigenic sperm protein	42143.1
Q9H300	PARL	Presenilins-associated rhomboid-like protein, mitochondrial	42094.4
P22314	UBA1	Ubiquitin-like modifier-activating enzyme 1	42063.7
Q2TAY7	SMU1	WD40 repeat-containing protein SMU1	42001.5
A1L0T0	ILVBL	Acetolactate synthase-like protein	41983.3
Q4KMP7	TBC1D10B	TBC1 domain family member 10B	41967.4
Q15459	SF3A1	Splicing factor 3A subunit 1	41912.6
Q14C86	GAPVD1	GTPase-activating protein and VPS9 domain-containing protein 1	41858.9
Q9BVQ7	SPATA5L1	Spermatogenesis-associated protein 5-like protein 1	41819.3
Q9BX40	LSM14B	Protein LSM14 homolog B	41807.1
Q14558	PRPSAP1	Phosphoribosyl pyrophosphate synthase-associated protein 1	41752
P36897	TGFBR1	TGF-beta receptor type-1	41749
Q6DKJ4	NXN	Nucleoredoxin	41741.1
Q9NUD5	ZCCHC3	Zinc finger CCHC domain-containing protein 3	41716.5
O95295	SNAPIN	SNARE-associated protein Snapin	41700
Q14203	DCTN1	Dynactin subunit 1	41688.4
Q9H944	MED20	Mediator of RNA polymerase II transcription subunit 20	41671.8
Q9H3M7	TXNIP	Thioredoxin-interacting protein	41622.2
P98172	EFNB1	Ephrin-B1	41603.7
Q9NWB6	ARGLU1	Arginine and glutamate-rich protein 1	41580.8
P06400	RB1	Retinoblastoma-associated protein	41478.9
O60313	OPA1	Dynamin-like 120 kDa protein, mitochondrial	41398.8
Q8N5F7	NKAP	NF-kappa-B-activating protein	41358.1
P51153	RAB13	Ras-related protein Rab-13	41336.8
P42679	MATK	Megakaryocyte-associated tyrosine-protein kinase	41297.4
Q8NHQ9	DDX55	ATP-dependent RNA helicase DDX55	41164.2
Q9BRP4	PAAF1	Proteasomal ATPase-associated factor 1	41067
P60228	EIF3E	Eukaryotic translation initiation factor 3 subunit E	41025.8
Q15118	PDK1	[Pyruvate dehydrogenase (acetyl-transferring)] kinase isozyme 1, mitochondrial	41024.3
Q96I25	RBM17	Splicing factor 45	41013.3
Q8IY17	PNPLA6	Neuropathy target esterase	40980.5
Q9Y2U8	LEMD3	Inner nuclear membrane protein Man1	40923.1
P49419	ALDH7A1	Alpha-aminoadipic semialdehyde dehydrogenase	40918.9
Q9ULV4	CORO1C	Coronin-1C	40892
Q53EU6	GPAT3	Glycerol-3-phosphate acyltransferase 3	40806
O60547	GMDS	GDP-mannose 4,6 dehydratase	40800.9
Q8NCM8	DYNC2H1	Cytoplasmic dynein 2 heavy chain 1	40791.1
Q9UET6	FTSJ1	Putative tRNA (cytidine(32)/guanosine(34)-2'-O)-methyltransferase	40603.4
P38435	GGCX	Vitamin K-dependent gamma-carboxylase	40583.7
O76031	CLPX	ATP-dependent Clp protease ATP-binding subunit clpX-like, mitochondrial	40569.4
Q9Y221	NIP7	60S ribosome subunit biogenesis protein NIP7 homolog	40543.2
P47813	EIF1AX	Eukaryotic translation initiation factor 1A, X-chromosomal	40530.7
Q9BRU9	UTP23	rRNA-processing protein UTP23 homolog	40494.7
Q15813	TBCE	Tubulin-specific chaperone E	40467
Q02790	FKBP4	Peptidyl-prolyl cis-trans isomerase FKBP4	40440.1
Q7Z6E9	RBBP6	E3 ubiquitin-protein ligase RBBP6	40432.9
Q5SSJ5	HP1BP3	Heterochromatin protein 1-binding protein 3	40430.8
O60568	PLOD3	Multifunctional procollagen lysine hydroxylase and glycosyltransferase LH3	40403.2
Q9BYI3	FAM126A	Hyccin	40302.6
Q6UXH1	CRELD2	Cysteine-rich with EGF-like domain protein 2	40224.9
P43246	MSH2	DNA mismatch repair protein Msh2	40219.5
Q658Y4	FAM91A1	Protein FAM91A1	40153.1
Q9BSJ8	ESYT1	Extended synaptotagmin-1	40144.8
P15311;P26038;P35241	EZR;MSN;RDX	Ezrin;Moesin;Radixin	40119.9
Q6ZR08	DNAH12	Dynein heavy chain 12, axonemal	40082.4
A6NHR9	SMCHD1	Structural maintenance of chromosomes flexible hinge domain-containing protein 1	39996.5
P43003	SLC1A3	Excitatory amino acid transporter 1	39987.7
Q9NXF1	TEX10	Testis-expressed protein 10	39973.5
Q10570	CPSF1	Cleavage and polyadenylation specificity factor subunit 1	39946.9
P05026	ATP1B1	Sodium/potassium-transporting ATPase subunit beta-1	39942.6
Q12789	GTF3C1	General transcription factor 3C polypeptide 1	39921.4
Q15477	SKIV2L	Helicase SKI2W	39894
Q58FG1	HSP90AA4P	Putative heat shock protein HSP 90-alpha A4	39891.9
O43790;P78385;Q14533	KRT86;KRT83;KRT81	Keratin, type II cuticular Hb6;Keratin, type II cuticular Hb3;Keratin, type II cuticular Hb1	39731.1
Q5ZPR3	CD276	CD276 antigen	39700.1
Q8TAF3	WDR48	WD repeat-containing protein 48	39652.2
Q9UI10	EIF2B4	Translation initiation factor eIF-2B subunit delta	39634.9
Q9Y2R0	COA3	Cytochrome c oxidase assembly factor 3 homolog, mitochondrial	39631.6
Q969M3	YIPF5	Protein YIPF5	39505.6
Q13643	FHL3	Four and a half LIM domains protein 3	39430.3
Q68D85	NCR3LG1	Natural cytotoxicity triggering receptor 3 ligand 1	39429.4
Q9Y4C2	TCAF1	TRPM8 channel-associated factor 1	39425.3
Q8IXI2	RHOT1	Mitochondrial Rho GTPase 1	39399.2
P50748	KNTC1	Kinetochore-associated protein 1	39392.9
Q9UBQ0	VPS29	Vacuolar protein sorting-associated protein 29	39289.5
P07339	CTSD	Cathepsin D	39169.7
Q96T37	RBM15	RNA-binding protein 15	39062
Q9UII4	HERC5	E3 ISG15--protein ligase HERC5	39056.2
P25685	DNAJB1	DnaJ homolog subfamily B member 1	39049.3
Q8IWC1	MAP7D3	MAP7 domain-containing protein 3	39028.2
Q12899	TRIM26	Tripartite motif-containing protein 26	38983.6
Q96RP9	GFM1	Elongation factor G, mitochondrial	38866.2
Q15269	PWP2	Periodic tryptophan protein 2 homolog	38816.4
O95563	MPC2	Mitochondrial pyruvate carrier 2	38811
O94776	MTA2	Metastasis-associated protein MTA2	38785.5
Q13616	CUL1	Cullin-1	38781.5
P54132	BLM	Bloom syndrome protein	38778.6
O60566	BUB1B	Mitotic checkpoint serine/threonine-protein kinase BUB1 beta	38774.6
Q9UH99	SUN2	SUN domain-containing protein 2	38750.4
Q14690	PDCD11	Protein RRP5 homolog	38742.4
Q969Y2	GTPBP3	tRNA modification GTPase GTPBP3, mitochondrial	38725.8
Q6UN15	FIP1L1	Pre-mRNA 3'-end-processing factor FIP1	38719
P67812	SEC11A	Signal peptidase complex catalytic subunit SEC11A	38663
P10398	ARAF	Serine/threonine-protein kinase A-Raf	38627.4
Q96AX1	VPS33A	Vacuolar protein sorting-associated protein 33A	38617.3
Q07864	POLE	DNA polymerase epsilon catalytic subunit A	38533.8
Q13123	IK	Protein Red	38446.8
P45974	USP5	Ubiquitin carboxyl-terminal hydrolase 5	38403.2
P14923;P35222	JUP;CTNNB1	Junction plakoglobin;Catenin beta-1	38270
Q9UPT8	ZC3H4	Zinc finger CCCH domain-containing protein 4	38177.3
Q13347	EIF3I	Eukaryotic translation initiation factor 3 subunit I	38156.5
O95819	MAP4K4	Mitogen-activated protein kinase kinase kinase kinase 4	38156.1
Q00403	GTF2B	Transcription initiation factor IIB	38125.2
Q8NCW5	NAXE	NAD(P)H-hydrate epimerase	38107.2
P78536	ADAM17	Disintegrin and metalloproteinase domain-containing protein 17	38025.6
O95232	LUC7L3	Luc7-like protein 3	37943.1
P26885	FKBP2	Peptidyl-prolyl cis-trans isomerase FKBP2	37914.6
Q8TEQ6	GEMIN5	Gem-associated protein 5	37907.4
O00429	DNM1L	Dynamin-1-like protein	37869.1
Q9P032	NDUFAF4	NADH dehydrogenase [ubiquinone] 1 alpha subcomplex assembly factor 4	37857.5
P51398	DAP3	28S ribosomal protein S29, mitochondrial	37852.8
Q96GC5	MRPL48	39S ribosomal protein L48, mitochondrial	37822.3
Q9Y5J1	UTP18	U3 small nucleolar RNA-associated protein 18 homolog	37711.5
Q96EK4	THAP11	THAP domain-containing protein 11	37580.9
Q5T447	HECTD3	E3 ubiquitin-protein ligase HECTD3	37568.1
Q71RC2	LARP4	La-related protein 4	37543.8
O00267	SUPT5H	Transcription elongation factor SPT5	37531.7
Q5XKP0	MICOS13	MICOS complex subunit MIC13	37518.8
Q9Y291	MRPS33	28S ribosomal protein S33, mitochondrial	37486.3
Q9BTX1	NDC1	Nucleoporin NDC1	37457.5
Q8WTT2	NOC3L	Nucleolar complex protein 3 homolog	37312.4
Q6NUS6	TCTN3	Tectonic-3	37295.7
Q9Y4Z0	LSM4	U6 snRNA-associated Sm-like protein LSm4	37208.8
Q96EY5	MVB12A	Multivesicular body subunit 12A	37200.7
P05067	APP	Amyloid-beta precursor protein	37181.7
O94808;Q06210	GFPT2;GFPT1	Glutamine--fructose-6-phosphate aminotransferase [isomerizing] 2;Glutamine--fructose-6-phosphate aminotransferase [isomerizing] 1	37122.1
P20290	BTF3	Transcription factor BTF3	36963.4
Q13206	DDX10	Probable ATP-dependent RNA helicase DDX10	36953.6
O60645	EXOC3	Exocyst complex component 3	36890.3
P40616	ARL1	ADP-ribosylation factor-like protein 1	36879.4
Q8IV48	ERI1	3'-5' exoribonuclease 1	36796.1
Q14CZ7	FASTKD3	FAST kinase domain-containing protein 3, mitochondrial	36703.7
Q9UGJ1	TUBGCP4	Gamma-tubulin complex component 4	36687.3
P49006	MARCKSL1	MARCKS-related protein	36684.3
P23634	ATP2B4	Plasma membrane calcium-transporting ATPase 4	36679
Q04721	NOTCH2	Neurogenic locus notch homolog protein 2	36653.6
P62873	GNB1	Guanine nucleotide-binding protein G(I)/G(S)/G(T) subunit beta-1	36618.7
Q15370	ELOB	Elongin-B	36577.7
Q92667	AKAP1	A-kinase anchor protein 1, mitochondrial	36549.3
P21127;Q9UQ88	CDK11B;CDK11A	Cyclin-dependent kinase 11B;Cyclin-dependent kinase 11A	36438.9
Q9UK41	VPS28	Vacuolar protein sorting-associated protein 28 homolog	36406.7
Q9Y2X0	MED16	Mediator of RNA polymerase II transcription subunit 16	36400.3
Q969H6	POP5	Ribonuclease P/MRP protein subunit POP5	36390.4
O60427	FADS1	Acyl-CoA (8-3)-desaturase	36341.8
P62136	PPP1CA	Serine/threonine-protein phosphatase PP1-alpha catalytic subunit	36243.2
Q92520	FAM3C	Protein FAM3C	36241.6
P00846	MT-ATP6	ATP synthase subunit a	36217.5
Q15797;Q99717	SMAD1;SMAD5	Mothers against decapentaplegic homolog 1;Mothers against decapentaplegic homolog 5	36205.4
P42574	CASP3	Caspase-3	36186.7
O60870	KIN	DNA/RNA-binding protein KIN17	36170.7
Q86UT6	NLRX1	NLR family member X1	36160
Q96F86	EDC3	Enhancer of mRNA-decapping protein 3	36140.2
O75330	HMMR	Hyaluronan mediated motility receptor	36103
Q9UPN7	PPP6R1	Serine/threonine-protein phosphatase 6 regulatory subunit 1	36044.5
Q9C0E2	XPO4	Exportin-4	36026.7
Q86X76	NIT1	Deaminated glutathione amidase	36007.4
Q6IPR3	TYW3	tRNA wybutosine-synthesizing protein 3 homolog	35808.7
P78344	EIF4G2	Eukaryotic translation initiation factor 4 gamma 2	35695.9
Q96D53	COQ8B	Atypical kinase COQ8B, mitochondrial	35695.4
Q99543	DNAJC2	DnaJ homolog subfamily C member 2	35658.6
Q92600	CNOT9	CCR4-NOT transcription complex subunit 9	35633.1
Q9NP72	RAB18	Ras-related protein Rab-18	35629.4
P42338	PIK3CB	Phosphatidylinositol 4,5-bisphosphate 3-kinase catalytic subunit beta isoform	35433.6
Q8IX18	DHX40	Probable ATP-dependent RNA helicase DHX40	35371.8
P55268	LAMB2	Laminin subunit beta-2	35363.7
P52298	NCBP2	Nuclear cap-binding protein subunit 2	35343.1
Q9UHI8	ADAMTS1	A disintegrin and metalloproteinase with thrombospondin motifs 1	35211.1
Q9Y4L5	RNF115	E3 ubiquitin-protein ligase RNF115	35188.7
Q8WUY8	NAT14	N-acetyltransferase 14	35160.4
Q5BJD5	TMEM41B	Transmembrane protein 41B	35154.6
Q13618	CUL3	Cullin-3	35149.1
Q9H9E3	COG4	Conserved oligomeric Golgi complex subunit 4	35131.4
O94766	B3GAT3	Galactosylgalactosylxylosylprotein 3-beta-glucuronosyltransferase 3	35029.4
P07357	C8A	Complement component C8 alpha chain	34999.9
Q9UH62	ARMCX3	Armadillo repeat-containing X-linked protein 3	34982.2
Q9Y613	FHOD1	FH1/FH2 domain-containing protein 1	34977.2
Q02040	AKAP17A	A-kinase anchor protein 17A	34942.9
P46940	IQGAP1	Ras GTPase-activating-like protein IQGAP1	34920.4
Q92785	DPF2	Zinc finger protein ubi-d4	34908.8
Q9UIA9	XPO7	Exportin-7	34886.2
Q9NZL4	HSPBP1	Hsp70-binding protein 1	34824.1
Q8IWB1	ITPRIP	Inositol 1,4,5-trisphosphate receptor-interacting protein	34735.9
Q9NU19	TBC1D22B	TBC1 domain family member 22B	34728
P50851	LRBA	Lipopolysaccharide-responsive and beige-like anchor protein	34698.4
Q7L5N7	LPCAT2	Lysophosphatidylcholine acyltransferase 2	34692.6
Q8N6N3	C1orf52	UPF0690 protein C1orf52	34667.1
O43808	SLC25A17	Peroxisomal membrane protein PMP34	34629.4
Q15437	SEC23B	Protein transport protein Sec23B	34578
O43772	SLC25A20	Mitochondrial carnitine/acylcarnitine carrier protein	34577.2
Q14141;Q92599;Q9NVA2	SEPT6;SEPT8;SEPT11	Septin-6;Septin-8;Septin-11	34536.1
Q16795	NDUFA9	NADH dehydrogenase [ubiquinone] 1 alpha subcomplex subunit 9, mitochondrial	34460.1
O43292	GPAA1	Glycosylphosphatidylinositol anchor attachment 1 protein	34367.7
Q8NCE2	MTMR14	Myotubularin-related protein 14	34364.4
Q9UKN8	GTF3C4	General transcription factor 3C polypeptide 4	34346.1
Q96CP6	GRAMD1A	Protein Aster-A	34168.9
P51572	BCAP31	B-cell receptor-associated protein 31	34154.9
Q9NPQ8	RIC8A	Synembryn-A	34115.5
P56270	MAZ	Myc-associated zinc finger protein	34036.9
P30876	POLR2B	DNA-directed RNA polymerase II subunit RPB2	34036.8
Q8NBJ7	SUMF2	Inactive C-alpha-formylglycine-generating enzyme 2	34033.8
Q8N1G2	CMTR1	Cap-specific mRNA (nucleoside-2'-O-)-methyltransferase 1	33991.3
Q9Y6K9	IKBKG	NF-kappa-B essential modulator	33941.4
O43172	PRPF4	U4/U6 small nuclear ribonucleoprotein Prp4	33939.5
Q6ICH7	ASPHD2	Aspartate beta-hydroxylase domain-containing protein 2	33938.4
Q92665	MRPS31	28S ribosomal protein S31, mitochondrial	33874.1
P31483;Q01085	TIA1;TIAL1	Nucleolysin TIA-1 isoform p40;Nucleolysin TIAR	33863
O75369	FLNB	Filamin-B	33811
Q9BZH6	WDR11	WD repeat-containing protein 11	33724.7
Q96P11	NSUN5	Probable 28S rRNA (cytosine-C(5))-methyltransferase	33724.1
O75821	EIF3G	Eukaryotic translation initiation factor 3 subunit G	33641
Q9NQC3	RTN4	Reticulon-4	33611.3
C9JLW8	MCRIP1	Mapk-regulated corepressor-interacting protein 1	33545.8
Q66K14	TBC1D9B	TBC1 domain family member 9B	33529.8
O00566	MPHOSPH10	U3 small nucleolar ribonucleoprotein protein MPP10	33491.9
Q9BY77	POLDIP3	Polymerase delta-interacting protein 3	33418.4
Q5SQN1	SNAP47	Synaptosomal-associated protein 47	33416.3
O75569	PRKRA	Interferon-inducible double-stranded RNA-dependent protein kinase activator A	33386.4
O43156	TTI1	TELO2-interacting protein 1 homolog	33200
Q6PCB5	RSBN1L	Round spermatid basic protein 1-like protein	33160.8
P33908	MAN1A1	Mannosyl-oligosaccharide 1,2-alpha-mannosidase IA	33114.7
Q9NVU7	SDAD1	Protein SDA1 homolog	33102.4
Q13098	GPS1	COP9 signalosome complex subunit 1	33060.5
O15460	P4HA2	Prolyl 4-hydroxylase subunit alpha-2	33051.6
Q5SNT2	TMEM201	Transmembrane protein 201	32980.8
Q8N163	CCAR2	Cell cycle and apoptosis regulator protein 2	32975.1
Q9NY93	DDX56	Probable ATP-dependent RNA helicase DDX56	32954.4
Q7Z460	CLASP1	CLIP-associating protein 1	32948.5
O43809	NUDT21	Cleavage and polyadenylation specificity factor subunit 5	32898
Q96MG7	NSMCE3	Non-structural maintenance of chromosomes element 3 homolog	32891.2
Q29RF7	PDS5A	Sister chromatid cohesion protein PDS5 homolog A	32878.4
P82673	MRPS35	28S ribosomal protein S35, mitochondrial	32874.2
O96011	PEX11B	Peroxisomal membrane protein 11B	32869.8
Q96BR5	COA7	Cytochrome c oxidase assembly factor 7	32862.2
O75170	PPP6R2	Serine/threonine-protein phosphatase 6 regulatory subunit 2	32849
Q9NSE4	IARS2	Isoleucine--tRNA ligase, mitochondrial	32812.6
Q8NCH0	CHST14	Carbohydrate sulfotransferase 14	32782.2
Q8N357	SLC35F6	Solute carrier family 35 member F6	32759.5
Q6PCT2	FBXL19	F-box/LRR-repeat protein 19	32653.6
P60174	TPI1	Triosephosphate isomerase	32641.3
O95202	LETM1	Mitochondrial proton/calcium exchanger protein	32641.3
O60220	TIMM8A	Mitochondrial import inner membrane translocase subunit Tim8 A	32639.8
Q9H583	HEATR1	HEAT repeat-containing protein 1	32633.1
Q9BUI4	POLR3C	DNA-directed RNA polymerase III subunit RPC3	32558.1
P21359	NF1	Neurofibromin	32416.3
Q53GS9	USP39	U4/U6.U5 tri-snRNP-associated protein 2	32380.7
P48739	PITPNB	Phosphatidylinositol transfer protein beta isoform	32333.4
Q9BWD1	ACAT2	Acetyl-CoA acetyltransferase, cytosolic	32330.1
O00217	NDUFS8	NADH dehydrogenase [ubiquinone] iron-sulfur protein 8, mitochondrial	32324.8
Q9UPR3	SMG5	Protein SMG5	32270.2
Q9P289	STK26	Serine/threonine-protein kinase 26	32247.5
Q5QP82	DCAF10	DDB1- and CUL4-associated factor 10	32169.4
P11388	TOP2A	DNA topoisomerase 2-alpha	32119.2
Q3SY69	ALDH1L2	Mitochondrial 10-formyltetrahydrofolate dehydrogenase	32073.5
O75915	ARL6IP5	PRA1 family protein 3	32032.9
Q9HAD4	WDR41	WD repeat-containing protein 41	32027.5
Q9UJU6	DBNL	Drebrin-like protein	31950.8
Q9ULW3	ABT1	Activator of basal transcription 1	31896.9
Q6L8Q7	PDE12	2',5'-phosphodiesterase 12	31896.4
Q96KC2	ARL5B	ADP-ribosylation factor-like protein 5B	31893.6
O43865	AHCYL1	S-adenosylhomocysteine hydrolase-like protein 1	31857.3
Q96CU9	FOXRED1	FAD-dependent oxidoreductase domain-containing protein 1	31762
Q9UGI8	TES	Testin	31750
O15228	GNPAT	Dihydroxyacetone phosphate acyltransferase	31671
O00767	SCD	Acyl-CoA desaturase	31669.2
Q9GZX9	TWSG1	Twisted gastrulation protein homolog 1	31616
Q14964	RAB39A	Ras-related protein Rab-39A	31607.9
Q13131	PRKAA1	5'-AMP-activated protein kinase catalytic subunit alpha-1	31573.2
P33981	TTK	Dual specificity protein kinase TTK	31562.9
P55854;P61956;Q6EEV6	SUMO3;SUMO2;SUMO4	Small ubiquitin-related modifier 3;Small ubiquitin-related modifier 2;Small ubiquitin-related modifier 4	31559
Q9H000	MKRN2	Probable E3 ubiquitin-protein ligase makorin-2	31558.5
Q96DA6	DNAJC19	Mitochondrial import inner membrane translocase subunit TIM14	31553.7
O75449	KATNA1	Katanin p60 ATPase-containing subunit A1	31544.8
Q9UKU7	ACAD8	Isobutyryl-CoA dehydrogenase, mitochondrial	31543.4
P49959	MRE11	Double-strand break repair protein MRE11	31495.7
Q9H8H3	METTL7A	Methyltransferase-like protein 7A	31432.6
Q86XZ4	SPATS2	Spermatogenesis-associated serine-rich protein 2	31424.2
O95237	LRAT	Lecithin retinol acyltransferase	31399.7
P16591	FER	Tyrosine-protein kinase Fer	31391
A6ZKI3	RTL8C	Retrotransposon Gag-like protein 8B	31390.8
Q8IWZ3	ANKHD1	Ankyrin repeat and KH domain-containing protein 1	31340.4
Q9Y5R8	TRAPPC1	Trafficking protein particle complex subunit 1	31305.1
Q9H9S3	SEC61A2	Protein transport protein Sec61 subunit alpha isoform 2	31259.9
Q9H8Y5	ANKZF1	Ankyrin repeat and zinc finger domain-containing protein 1	31120
Q8N5C6	SRBD1	S1 RNA-binding domain-containing protein 1	31096.6
O95218	ZRANB2	Zinc finger Ran-binding domain-containing protein 2	31094.4
Q9H5K3	POMK	Protein O-mannose kinase	31066.7
Q5H9R7	PPP6R3	Serine/threonine-protein phosphatase 6 regulatory subunit 3	31021
O60353	FZD6	Frizzled-6	30985.6
Q86XI2	NCAPG2	Condensin-2 complex subunit G2	30866.3
Q8IWF2	FOXRED2	FAD-dependent oxidoreductase domain-containing protein 2	30860.8
Q8NFW8	CMAS	N-acylneuraminate cytidylyltransferase	30828.2
Q15155	NOMO1	Nodal modulator 1	30777.9
[truncated: 793 more rows]
