# Supplementary material for: E3 ligase FBXO2-mediated protein stability of insulin receptor regulates adipogenesis and metabolic health in obesity
Source: Research Square preprint supplement (doi:10.21203/rs.3.rs-5892373/v1), 2025-10-28
Supplement: Supplementary file 2 [file 2b2bf7fa5082f55778f2d9ed.xlsx]

## Sheet: Sheet1
Table S4. Antibodies List
Antibodies	Identifier	Source
FBXO2（A-12）	sc-393873	Santa
Cul-1（D-5）	sc-17775	Santa
SKP1	sc-5281	Santa
HA	sc-7392	Santa
Ubiquitin（P4D1）	sc-8017	Santa
Flag	14793	CST
Insulin Receptor	3025	CST
Phospho-Insulin Receptor	2969	CST
PPARγ（81B8）	71433	CST
GAPDH	5174	CST
Anti-rabbit IgG	7074S	CST
AKT1/2/3	CY5561	Abways
Phospho-AKT	CY6569	Abways
IRS1	CY3428	Abways
Phospho-IRS1	CY6308	Abways
IRS2	CY7232	Abways
EGR2（KROX20）	CY8442	Abways
C/EBPα	CY5723	Abways
C/EBPβ	CY3276	Abways
Myc-Tag	AB0001	Abways
Moese Control IgG	AC011	ABclonal
