# Supplementary material for: E3 ligase FBXO2-mediated protein stability of insulin receptor regulates adipogenesis and metabolic health in obesity
Source: Research Square preprint supplement (doi:10.21203/rs.3.rs-5892373/v1), 2025-10-28
Supplement: Supplementary file 3 [file a929bd9516272e8671766d10.xlsx]

## Sheet: Sheet1
Table S3. Primer List
Fbxo2	Forward Primer: CTCAGAGCAGTACCTTGCTCATAAG
	Reverse Primer: GCTAGTAGACACTCACAGGAATACGG
Klf5	Forward Primer: TTCGCCAACTCTCCCACCTG
	Reverse Primer: TGCACTTGTAGGGCTTCTCG
Krox20	Forward Primer: CTCGTCGGTGACCATCTTCC
	Reverse Primer: TCGGATACGGGAGATCCAGG
C/ebpβ	Forward Primer: TGGACAAGCTGAGCGACGAG
	Reverse Primer: GCTGCTCCACCTTCTTCTGC
C/ebpα	Forward Primer: GACATCAGCGCCTACATCGA
	Reverse Primer: TCGGCTGTGCTGGAAGAG
Fabp4	Forward Primer: GGATGGAAAGTCGACCACAA
	Reverse Primer: TGGAAGTCACGCCTTTCATA
Pparγ	Forward Primer: GAAAGACAACGGACAAATCACC
	Reverse Primer: GGGGGTGATATGTTTGAACTTG
Ki67	Forward Primer: GCGGTTCTCAAGGACGTGAAT
	Reverse Primer: GTCTCCGGGATGTCACTCAGA
Ly6a	Forward Primer: TCCTGTGATTGCTGTAGACTCG
	Reverse Primer: GGCCGCTCTGTTGCATTTTG
Pdgfrα	Forward Primer: ATGCGCTACTCCCTGAAAGTG
	Reverse Primer: GTGGCACGACTCATCTTGC
Casp2	Forward Primer: CTGGAGCCAGAAGTGTTCCAC
	Reverse Primer: AGGCACAAAGCGTATGAGTCT
Bax	Forward Primer: GCGGTTCTCAAGGACGTGAAT
	Reverse Primer: GTCTCCGGGATGTCACTCAGA
Puma	Forward Primer: CAATCTGACCTACCGCGATCT
	Reverse Primer: TCGATGATGCGTGAGTAGTCC
Hif1α	Forward Primer: AGCAGGTGATCTTCGAGGAG
	Forward Primer: CATGGGGCGAAACCAATGTA
F4/80	Forward Primer: TCCAAAATCAAGTGGGGCGA
	Reverse Primer: TGATGACCCTTTTGGCTCCC
Acta2	Forward Primer: CCCAGACATCAGGGAGTAATGG
	Reverse Primer: TCTATCGGATACTTCAGCGTCA
Col1a1	Forward Primer: TGCTAACGTGGTTCGTGACCGT
	Reverse Primer: ACATCTTGAGGTCGCGGCATGT
Tgfβ1	Forward Primer: ATTTGGAGCCTGGACACACA
	Reverse Primer: GAGCGCACAATCATGTTGGA
Il6	Forward Primer: GGATACCACTCCCAACAGACC
	Reverse Primer: GCAAGTGCATCATCGTTGTTC
Il1β	Forward Primer: AATCTCGCAGCAGCACATCAAC
	Reverse Primer: TGTCCTCATCCTGGAAGGTC
Tnfα	Forward Primer: CTCATCAGTTCTATGGCCCAG
	Reverse Primer: GTAGACAAGGTACAACCCATCG
ATPsynβ	Forward Primer: GACATGGGCACAATGCAGG
	Reverse Primer: GACATGGGCACAATGCAGG
Cox7a1	Forward Primer: GCTCTGGTCCGGTCTTTTAGC
	Reverse Primer: GTACTGGGAGGTCATTGTCGG
Cox8b	Forward Primer: GAACCATGAAGCCAACGACT
	Reverse Primer: GCGAAGTTCACAGTGGTTCC
Ir	Forward Primer: CCCTCATCTTTGTCTTCCTCTTCAG
	Reverse Primer: TGAGGTACTCAGGGTTTGAAGATGC
Pdgfrβ	Forward Primer: CAAGAAGCGGCCATGAATCAG
	Reverse Primer: CGGCCCTAGTGAGTTGTTGT
Adiponectin	Forward Primer: GGAGAGAAAGGAGATGCAGGT
	Reverse Primer: CTTTCCTGCCAGGGGTTC
GAPDH	Forward Primer: ACCTTCTACAATGAGCTGCG
	Reverse Primer: CCTGGATAGCAACGTACATGG
