# Supplementary material for: E3 ligase FBXO2-mediated protein stability of insulin receptor regulates adipogenesis and metabolic health in obesity
Source: Research Square preprint supplement (doi:10.21203/rs.3.rs-5892373/v1), 2025-10-28
Supplement: Supplementary file 4 [file bc1ce3b9c26dc71f29f2af31.xlsx]

## Sheet: 20240118_161216_20240115_XY_Rep
PG.Genes	PG.ProteinDescriptions	PG.ProteinGroups	[1] 20240112_XY_S1.raw.PG.Quantity
NUDT4B	Diphosphoinositol polyphosphate phosphohydrolase NUDT4B	A0A024RBG1	33080.4
IGKV2-28;IGKV2D-29;IGKV2D-30;IGKV2-40;IGKV2D-26;IGKV2-29;IGKV2D-40;IGKV2D-28;IGKV2-30	Immunoglobulin kappa variable 2-28;Immunoglobulin kappa variable 2D-29;Immunoglobulin kappa variable 2D-30;Immunoglobulin kappa variable 2-40;Immunoglobulin kappa variable 2D-26;Immunoglobulin kappa variable 2-29;Immunoglobulin kappa variable 2D-40;Immunoglobulin kappa variable 2D-28;Immunoglobulin kappa variable 2-30	A0A075B6P5;A0A075B6S2;A0A075B6S6;A0A087WW87;A0A0A0MRZ7;A2NJV5;P01614;P01615;P06310	86992.8
IGHV6-1	Immunoglobulin heavy variable 6-1	A0A0B4J1U7	4621703
IGHV3-21;IGHV3-74;IGHV3-20;IGHV3-11;IGHV3-48;IGHV3-7;IGHV3-9	Immunoglobulin heavy variable 3-21;Immunoglobulin heavy variable 3-74;Immunoglobulin heavy variable 3-20;Immunoglobulin heavy variable 3-11;Immunoglobulin heavy variable 3-48;Immunoglobulin heavy variable 3-7;Immunoglobulin heavy variable 3-9	A0A0B4J1V1;A0A0B4J1X5;A0A0C4DH32;P01762;P01763;P01780;P01782	157096
UBE2L5;UBE2L3	Ubiquitin-conjugating enzyme E2 L5;Ubiquitin-conjugating enzyme E2 L3	A0A1B0GUS4;P68036	13451.3
UBA6	Ubiquitin-like modifier-activating enzyme 6	A0AVT1	16828
ESYT2	Extended synaptotagmin-2	A0FGR8	341569
GXYLT2	Glucoside xylosyltransferase 2	A0PJZ3	21619
TMEM120B	Transmembrane protein 120B	A0PK00	78856.5
SLC22A23	Solute carrier family 22 member 23	A1A5C7	58573.2
ILVBL	Acetolactate synthase-like protein	A1L0T0	136957
ZNF320;ZNF98;ZNF729;ZNF726;ZNF724;ZNF732;ZSCAN12;ZNF737;ZNF254;ZNF735;ZNF728;ZNF708;ZNF43;ZNF85;ZNF92;ZNF91;ZNF273;ZNF141;ZNF506;ZNF626;ZNF66;ZNF600;ZNF493;ZNF100;ZNF679;ZNF808;ZNF676;ZNF675;ZNF431;ZNF486;ZNF479;ZNF681;ZNF714;ZNF578;ZNF251;ZNF430;ZNF492;ZNF107;ZNF257	Zinc finger protein 320;Zinc finger protein 98;Zinc finger protein 729;Zinc finger protein 726;Zinc finger protein 724;Zinc finger protein 732;Zinc finger and SCAN domain-containing protein 12;Zinc finger protein 737;Zinc finger protein 254;Putative zinc finger protein 735;Zinc finger protein 728;Zinc finger protein 708;Zinc finger protein 43;Zinc finger protein 85;Zinc finger protein 92;Zinc fin…	A2RRD8;A6NK75;A6NN14;A6NNF4;A8MTY0;B4DXR9;O43309;O75373;O75437;P0CB33;P0DKX0;P17019;P17038;Q03923;Q03936;Q05481;Q14593;Q15928;Q5JVG8;Q68DY1;Q6ZN08;Q6ZNG1;Q6ZR52;Q8IYN0;Q8IYX0;Q8N4W9;Q8N7Q3;Q8TD23;Q8TF32;Q96H40;Q96JC4;Q96N22;Q96N38;Q96N58;Q9BRH9;Q9H8G1;Q9P255;Q9UII5;Q9Y2Q1	4932.05
NBAS	Neuroblastoma-amplified sequence	A2RRP1	3487.51
FAM234B	Protein FAM234B	A2RU67	256869
TMEM131L	Transmembrane protein 131-like	A2VDJ0	254981
VWA8	von Willebrand factor A domain-containing protein 8	A3KMH1	41146.2
CDC14C	Dual specificity protein phosphatase CDC14C	A4D256	126209
CNOT1	CCR4-NOT transcription complex subunit 1	A5YKK6	264449
PGP	Glycerol-3-phosphate phosphatase	A6NDG6	158507
C5orf51	UPF0600 protein C5orf51	A6NDU8	150041
TUBAL3	Tubulin alpha chain-like 3	A6NHL2	205574
SMCHD1	Structural maintenance of chromosomes flexible hinge domain-containing protein 1	A6NHR9	27619.4
RRN3P2;RRN3	Putative RRN3-like protein RRN3P2;RNA polymerase I-specific transcription initiation factor RRN3	A6NIE6;Q9NYV6	29158.7
UNC119B	Protein unc-119 homolog B	A6NIH7	44180.3
CCDC85C	Coiled-coil domain-containing protein 85C	A6NKD9	11011.3
SAC3D1	SAC3 domain-containing protein 1	A6NKF1	55032.3
C15orf61	Uncharacterized protein C15orf61	A6NNL5	62260.9
POM121C	Nuclear envelope pore membrane protein POM 121C	A8CG34	47761.4
DDX11L8;DDX12P	Putative ATP-dependent RNA helicase DDX11-like protein 8;Putative ATP-dependent RNA helicase DDX12	A8MPP1;Q92771	41777.6
FAM171A2	Protein FAM171A2	A8MVW0	102032
SNRPGP15;SNRPG	Putative small nuclear ribonucleoprotein G-like protein 15;Small nuclear ribonucleoprotein G	A8MWD9;P62308	151307
HACD1	Very-long-chain (3R)-3-hydroxyacyl-CoA dehydratase 1	B0YJ81	15765.8
WDR64	WD repeat-containing protein 64	B1ANS9	356718
HMGB1P1;HMGB1;HMGB2	Putative high mobility group protein B1-like 1;High mobility group protein B1;High mobility group protein B2	B2RPK0;P09429;P26583	22469.1
GPR89A;GPR89B	Golgi pH regulator A;Golgi pH regulator B	B7ZAQ6;P0CG08	147948
NACA	Nascent polypeptide-associated complex subunit alpha, muscle-specific form;Nascent polypeptide-associated complex subunit alpha	E9PAV3;Q13765	403037
C11orf98	Uncharacterized protein C11orf98	E9PRG8	13187.2
SUMO1P1;SUMO1	Small ubiquitin-related modifier 5;Small ubiquitin-related modifier 1	G2XKQ0;P63165	87311.9
DNASE2	Deoxyribonuclease-2-alpha	O00115	214542
AGPS	Alkyldihydroxyacetonephosphate synthase, peroxisomal	O00116	61456.7
UBXN8	UBX domain-containing protein 8	O00124	27046.3
KIF2A	Kinesin-like protein KIF2A	O00139	40929.9
DDX39A	ATP-dependent RNA helicase DDX39A	O00148	555222
PDLIM1	PDZ and LIM domain protein 1	O00151	20309.9
ACOT7	Cytosolic acyl coenzyme A thioester hydrolase	O00154	39192.9
MYO1C	Unconventional myosin-Ic	O00159	116942
SNAP23	Synaptosomal-associated protein 23	O00161	20962.8
HAX1	HCLS1-associated protein X-1	O00165	122996
AIP	AH receptor-interacting protein	O00170	34042.5
GTPBP1	GTP-binding protein 1	O00178	42225.8
STXBP3	Syntaxin-binding protein 3	O00186	65763.5
SMAP	Small acidic protein	O00193	37081.8
AP3B1	AP-3 complex subunit beta-1	O00203	288228
NDUFS8	NADH dehydrogenase [ubiquinone] iron-sulfur protein 8, mitochondrial	O00217	161760
PSMD11	26S proteasome non-ATPase regulatory subunit 11	O00231	396879
PSMD12	26S proteasome non-ATPase regulatory subunit 12	O00232	263103
PSMD9	26S proteasome non-ATPase regulatory subunit 9	O00233	230078
MEN1	Menin	O00255	45771.6
WRB	Tail-anchored protein insertion receptor WRB	O00258	166111
PGRMC1	Membrane-associated progesterone receptor component 1	O00264	485470
DFFA	DNA fragmentation factor subunit alpha	O00273	35332.1
EIF3F	Eukaryotic translation initiation factor 3 subunit F	O00303	75279.7
WWP2	NEDD4-like E3 ubiquitin-protein ligase WWP2	O00308	75778.6
CDC7	Cell division cycle 7-related protein kinase	O00311	69090.4
PDHX	Pyruvate dehydrogenase protein X component, mitochondrial	O00330	73432.5
QSOX1	Sulfhydryl oxidase 1	O00391	62620.7
SLC33A1	Acetyl-coenzyme A transporter 1	O00400	48745.1
IPO5	Importin-5	O00410	392988
POLRMT	DNA-directed RNA polymerase, mitochondrial	O00411	9716.23
IGF2BP3	Insulin-like growth factor 2 mRNA-binding protein 3	O00425	115872
DNM1L	Dynamin-1-like protein	O00429	63179.1
RTCA	RNA 3'-terminal phosphate cyclase	O00442	83561.9
PIK3C2A	Phosphatidylinositol 4-phosphate 3-kinase C2 domain-containing subunit alpha	O00443	11490.2
IFRD1	Interferon-related developmental regulator 1	O00458	182513
MANBA	Beta-mannosidase	O00462	1324345
AGRN	Agrin	O00468	96406.3
PLOD2	Procollagen-lysine,2-oxoglutarate 5-dioxygenase 2	O00469	2.46384e+06
EXOC5	Exocyst complex component 5	O00471	92212.8
NDUFA4	Cytochrome c oxidase subunit NDUFA4	O00483	1.14466e+06
PSMD14	26S proteasome non-ATPase regulatory subunit 14	O00487	328615
KPNA3	Importin subunit alpha-4	O00505	65983.9
STK25	Serine/threonine-protein kinase 25	O00506	35262.3
PES1	Pescadillo homolog	O00541	67411.3
EBAG9	Receptor-binding cancer antigen expressed on SiSo cells	O00559	26279.4
SDCBP	Syntenin-1	O00560	71980.6
NOP56	Nucleolar protein 56	O00567	144677
DDX3X	ATP-dependent RNA helicase DDX3X	O00571	641030
RNASET2	Ribonuclease T2	O00584	1.07935e+06
PODXL	Podocalyxin	O00592	15369.7
PEX12	Peroxisome assembly protein 12	O00623	31694.8
KPNA4	Importin subunit alpha-3	O00629	21936.3
PPP6C	Serine/threonine-protein phosphatase 6 catalytic subunit	O00743	135888
MAN2B1	Lysosomal alpha-mannosidase	O00754	4.93128e+06
SCD	Acyl-CoA desaturase	O00767	569420
NEMP1	Nuclear envelope integral membrane protein 1	O14524	542125
TXNDC9	Thioredoxin domain-containing protein 9	O14530	56134.5
TRAFD1	TRAF-type zinc finger domain-containing protein 1	O14545	62608.8
NDUFAB1	Acyl carrier protein, mitochondrial	O14561	28400.2
COPE	Coatomer subunit epsilon	O14579	438246
AP3D1	AP-3 complex subunit delta-1	O14617	64785.4
CCS	Copper chaperone for superoxide dismutase	O14618	46597.8
DVL2;DVL3	Segment polarity protein dishevelled homolog DVL-2;Segment polarity protein dishevelled homolog DVL-3	O14641;Q92997	9283.73
CHD1;CHD2;CHD9;CHD6;CHD8;CHD7	Chromodomain-helicase-DNA-binding protein 1;Chromodomain-helicase-DNA-binding protein 2;Chromodomain-helicase-DNA-binding protein 9;Chromodomain-helicase-DNA-binding protein 6;Chromodomain-helicase-DNA-binding protein 8;Chromodomain-helicase-DNA-binding protein 7	O14646;O14647;Q3L8U1;Q8TD26;Q9HCK8;Q9P2D1	18280.3
IRS4	Insulin receptor substrate 4	O14654	1058234
TOR1A	Torsin-1A	O14656	97333.9
TOR1B	Torsin-1B	O14657	128833
STX16	Syntaxin-16	O14662	17786.3
ADAM10	Disintegrin and metalloproteinase domain-containing protein 10	O14672	361405
EI24	Etoposide-induced protein 2.4 homolog	O14681	603946
APAF1	Apoptotic protease-activating factor 1	O14727	12293.1
RIOK3	Serine/threonine-protein kinase RIO3	O14730	86213
IMPA2	Inositol monophosphatase 2	O14732	94477.3
MAP2K7	Dual specificity mitogen-activated protein kinase kinase 7	O14733	180699
ACOT8	Acyl-coenzyme A thioesterase 8	O14734	208282
CDIPT	CDP-diacylglycerol--inositol 3-phosphatidyltransferase	O14735	1.17928e+06
PRMT5	Protein arginine N-methyltransferase 5	O14744	118166
CHEK1	Serine/threonine-protein kinase Chk1	O14757	40358.1
TPP1	Tripeptidyl-peptidase 1	O14773	3700986
TCERG1	Transcription elongation regulator 1	O14776	79038.2
TNPO2	Transportin-2	O14787	166910
PSMA7	Proteasome subunit alpha type-7	O14818	1.14182e+06
SCAMP3	Secretory carrier-associated membrane protein 3	O14828	160036
BCKDK	[3-methyl-2-oxobutanoate dehydrogenase [lipoamide]] kinase, mitochondrial	O14874	7967.7
MGST3	Microsomal glutathione S-transferase 3	O14880	237479
GEMIN2	Gem-associated protein 2	O14893	83342.4
PCDH17	Protocadherin-17	O14917	22367.9
TIMM23	Mitochondrial import inner membrane translocase subunit Tim23	O14925	363603
HAT1	Histone acetyltransferase type B catalytic subunit	O14929	753250
PLD2	Phospholipase D2	O14939	68070.6
UQCRQ	Cytochrome b-c1 complex subunit 8	O14949	114460
MYL12B;MYL12A	Myosin regulatory light chain 12B;Myosin regulatory light chain 12A	O14950;P19105	49983.7
AURKA	Aurora kinase A	O14965	38361.4
RAB29	Ras-related protein Rab-7L1	O14966	36106.6
CLGN	Calmegin	O14967	146409
DSCR3	Down syndrome critical region protein 3	O14972	15553.9
PPP1R12A	Protein phosphatase 1 regulatory subunit 12A	O14974	2008.9
SLC27A2	Very long-chain acyl-CoA synthetase	O14975	110722
GAK	Cyclin-G-associated kinase	O14976	15993.6
HNRNPDL	Heterogeneous nuclear ribonucleoprotein D-like	O14979	76870.5
XPO1	Exportin-1	O14980	570088
BTAF1	TATA-binding protein-associated factor 172	O14981	119535
SEC16A	Protein transport protein Sec16A	O15027	218910
PLXNB2	Plexin-B2	O15031	307235
U2SURP	U2 snRNP-associated SURP motif-containing protein	O15042	844904
SYNM	Synemin	O15061	138015
PFAS	Phosphoribosylformylglycinamidine synthase	O15067	40654
DCLK1	Serine/threonine-protein kinase DCLK1	O15075	15412.4
ANKRD28	Serine/threonine-protein phosphatase 6 regulatory ankyrin repeat subunit A	O15084	32855.9
KIAA0391	Mitochondrial ribonuclease P catalytic subunit	O15091	17642
CHUK	Inhibitor of nuclear factor kappa-B kinase subunit alpha	O15111	82561.3
NPC1	NPC intracellular cholesterol transporter 1	O15118	1.05506e+06
AGPAT2	1-acyl-sn-glycerol-3-phosphate acyltransferase beta	O15120	134723
DEGS1	Sphingolipid delta(4)-desaturase DES1	O15121	39354.4
SCAMP2	Secretory carrier-associated membrane protein 2	O15127	78273.8
ARPC2	Actin-related protein 2/3 complex subunit 2	O15144	30443.5
ARPC3	Actin-related protein 2/3 complex subunit 3	O15145	74579.6
BET1	BET1 homolog	O15155	84934.3
POLR1C	DNA-directed RNA polymerases I and III subunit RPAC1	O15160	147582
PLSCR1	Phospholipid scramblase 1	O15162	45051.6
TRIM24	Transcription intermediary factor 1-alpha	O15164	49649.8
PGRMC2	Membrane-associated progesterone receptor component 2	O15173	217087
NKRF	NF-kappa-B-repressing factor	O15226	39737
GNPAT	Dihydroxyacetone phosphate acyltransferase	O15228	99077
LAMA5	Laminin subunit alpha-5	O15230	140065
MRPS12	28S ribosomal protein S12, mitochondrial	O15235	159999
LEPROT	Leptin receptor gene-related protein	O15243	59887.7
RER1	Protein RER1	O15258	177485
SURF4	Surfeit locus protein 4	O15260	1394536
SPTLC1	Serine palmitoyltransferase 1	O15269	278031
SPTLC2	Serine palmitoyltransferase 2	O15270	134399
OGT	UDP-N-acetylglucosamine--peptide N-acetylglucosaminyltransferase 110 kDa subunit	O15294	12301.8
SIVA1	Apoptosis regulatory protein Siva	O15304	52696.3
RAD51B	DNA repair protein RAD51 homolog 2	O15315	7317.9
TM9SF1	Transmembrane 9 superfamily member 1	O15321	70043.5
PPM1G	Protein phosphatase 1G	O15355	64019.7
INPPL1	Phosphatidylinositol 3,4,5-trisphosphate 5-phosphatase 2	O15357	32055.1
EIF3D	Eukaryotic translation initiation factor 3 subunit D	O15371	201109
EIF3H	Eukaryotic translation initiation factor 3 subunit H	O15372	40760.8
NCAM2	Neural cell adhesion molecule 2	O15394	26275.2
IPO8	Importin-8	O15397	86107.7
ABCC4	Multidrug resistance-associated protein 4	O15439	81294.7
ABCC5	Multidrug resistance-associated protein 5	O15440	32917.9
P4HA2	Prolyl 4-hydroxylase subunit alpha-2	O15460	572120
INSIG1	Insulin-induced gene 1 protein	O15503	18769.9
ARPC5	Actin-related protein 2/3 complex subunit 5	O15511	78848.5
TAPBP	Tapasin	O15533	146005
DHX15	Pre-mRNA-splicing factor ATP-dependent RNA helicase DHX15	O43143	171769
ZZEF1	Zinc finger ZZ-type and EF-hand domain-containing protein 1	O43149	41502.8
TTI1	TELO2-interacting protein 1 homolog	O43156	92890
PJA2	E3 ubiquitin-protein ligase Praja-2	O43164	6181.21
SIPA1L1;SIPA1L3;SIPA1L2	Signal-induced proliferation-associated 1-like protein 1;Signal-induced proliferation-associated 1-like protein 3;Signal-induced proliferation-associated 1-like protein 2	O43166;O60292;Q9P2F8	3000.33
CYB5B	Cytochrome b5 type B	O43169	182042
PRPF4	U4/U6 small nuclear ribonucleoprotein Prp4	O43172	77112.7
PHGDH	D-3-phosphoglycerate dehydrogenase	O43175	4259509
NDUFS4	NADH dehydrogenase [ubiquinone] iron-sulfur protein 4, mitochondrial	O43181	21713.5
DYNC1LI2	Cytoplasmic dynein 1 light intermediate chain 2	O43237	41705.6
PSMD3	26S proteasome non-ATPase regulatory subunit 3	O43242	956249
ZW10	Centromere/kinetochore protein zw10 homolog	O43264	403014
B4GALT5	Beta-1,4-galactosyltransferase 5	O43286	50713.9
SART1	U4/U6.U5 tri-snRNP-associated protein 1	O43290	10654
GPAA1	Glycosylphosphatidylinositol anchor attachment 1 protein	O43292	1.97205e+06
EEF1E1	Eukaryotic translation elongation factor 1 epsilon-1	O43324	376583
WDR62	WD repeat-containing protein 62	O43379	33028
HNRNPR	Heterogeneous nuclear ribonucleoprotein R	O43390	182982
PRPF3	U4/U6 small nuclear ribonucleoprotein Prp3	O43395	53837.6
TXNL1	Thioredoxin-like protein 1	O43396	11221.9
EMC8	ER membrane protein complex subunit 8	O43402	233214
COCH	Cochlin	O43405	74882.5
EIF4G3	Eukaryotic translation initiation factor 4 gamma 3	O43432	29451.9
PPIH	Peptidyl-prolyl cis-trans isomerase H	O43447	60992.8
MBTPS2	Membrane-bound transcription factor site-2 protease	O43462	14326.2
EPB41L2	Band 4.1-like protein 2	O43491	13453
TGOLN2	Trans-Golgi network integral membrane protein 2	O43493	13411.3
RAD51C	DNA repair protein RAD51 homolog 3	O43502	63071.4
B4GAT1	Beta-1,4-glucuronyltransferase 1	O43505	142295
BCL2L11	Bcl-2-like protein 11	O43521	26222.5
XRCC3	DNA repair protein XRCC3	O43542	118367
RNF13	E3 ubiquitin-protein ligase RNF13	O43567	81047.5
DENR	Density-regulated protein	O43583	5997.97
XPOT	Exportin-T	O43592	430198
TIMM44	Mitochondrial import inner membrane translocase subunit TIM44	O43615	85503.9
TRAPPC3	Trafficking protein particle complex subunit 3	O43617	95619.6
TSPAN6	Tetraspanin-6	O43657	352150
PLRG1	Pleiotropic regulator 1	O43660	15369.4
PRC1	Protein regulator of cytokinesis 1	O43663	28646.3
ZNF207	BUB3-interacting and GLEBS motif-containing protein ZNF207	O43670	106101
ASNA1	ATPase ASNA1	O43681	88469.3
BUB1	Mitotic checkpoint serine/threonine-protein kinase BUB1	O43683	26881.8
BUB3	Mitotic checkpoint protein BUB3	O43684	262797
ACTN4;ACTN1	Alpha-actinin-4;Alpha-actinin-1	O43707;P12814	28000.7
HTATSF1	HIV Tat-specific factor 1	O43719	13701.4
AP1G1	AP-1 complex subunit gamma-1	O43747	162346
SYNGR1	Synaptogyrin-1	O43759	134312
SYNGR3	Synaptogyrin-3	O43761	34043.1
SGTA	Small glutamine-rich tetratricopeptide repeat-containing protein alpha	O43765	50157.5
SLC25A20	Mitochondrial carnitine/acylcarnitine carrier protein	O43772	77931.9
MYO1B	Unconventional myosin-Ib	O43795	844482
SLC25A17	Peroxisomal membrane protein PMP34	O43808	225096
NUDT21	Cleavage and polyadenylation specificity factor subunit 5	O43809	57885.2
LANCL1	Glutathione S-transferase LANCL1	O43813	141783
SCO2	Protein SCO2 homolog, mitochondrial	O43819	219331
AKAP8	A-kinase anchor protein 8	O43823	37049.5
GTPBP6	Putative GTP-binding protein 6	O43824	59535.4
SLC37A4	Glucose-6-phosphate exchanger SLC37A4	O43826	181570
IDH3B	Isocitrate dehydrogenase [NAD] subunit beta, mitochondrial	O43837	217536
CALU	Calumenin	O43852	1.20968e+06
AHCYL1	S-adenosylhomocysteine hydrolase-like protein 1	O43865	27057.6
KIF1C	Kinesin-like protein KIF1C	O43896	9626.37
ORC5	Origin recognition complex subunit 5	O43913	99759.8
NDUFS5	NADH dehydrogenase [ubiquinone] iron-sulfur protein 5	O43920	77477
ORC4	Origin recognition complex subunit 4	O43929	75917.1
PEX1	Peroxisome biogenesis factor 1	O43933	53120.6
RAD21	Double-strand-break repair protein rad21 homolog	O60216	42271.6
SSSCA1	Sjoegren syndrome/scleroderma autoantigen 1	O60232	42064
PCDH7	Protocadherin-7	O60245	48333.3
PRPSAP2	Phosphoribosyl pyrophosphate synthase-associated protein 2	O60256	30413.4
SMARCA5	SWI/SNF-related matrix-associated actin-dependent regulator of chromatin subfamily A member 5	O60264	44988.4
SPAG9	C-Jun-amino-terminal kinase-interacting protein 4	O60271	42048.8
URB1	Nucleolar pre-ribosomal-associated protein 1	O60287	84167.2
MGRN1	E3 ubiquitin-protein ligase MGRN1	O60291	392159
AQR	RNA helicase aquarius	O60306	40104.6
OPA1	Dynamin-like 120 kDa protein, mitochondrial	O60313	143989
KIF1B	Kinesin-like protein KIF1B	O60333	46296.2
KDM1A	Lysine-specific histone demethylase 1A	O60341	34131.7
TBC1D4	TBC1 domain family member 4	O60343	2.15288e+06
PHLPP1	PH domain leucine-rich repeat-containing protein phosphatase 1	O60346	18749.5
FZD6	Frizzled-6	O60353	22110.5
FADS1	Acyl-CoA (8-3)-desaturase	O60427	38224.1
PLXNC1	Plexin-C1	O60486	18456.3
ACSL4	Long-chain-fatty-acid--CoA ligase 4	O60488	45529.9
SNX3	Sorting nexin-3	O60493	15559.4
OGA	Protein O-GlcNAcase	O60502	27982.2
SYNCRIP	Heterogeneous nuclear ribonucleoprotein Q	O60506	353047
TPST1	Protein-tyrosine sulfotransferase 1	O60507	37977.4
B4GALT3	Beta-1,4-galactosyltransferase 3	O60512	30920.8
RANBP6	Ran-binding protein 6	O60518	136718
GMDS	GDP-mannose 4,6 dehydratase	O60547	76373.5
CCNT1	Cyclin-T1	O60563	47124.9
BUB1B	Mitotic checkpoint serine/threonine-protein kinase BUB1 beta	O60566	30208.1
PLOD3	Multifunctional procollagen lysine hydroxylase and glycosyltransferase LH3	O60568	4702674
DIAPH1	Protein diaphanous homolog 1	O60610	228620
SELENOF	Selenoprotein F	O60613	166938
TSPAN3	Tetraspanin-3	O60637	413456
EXOC3	Exocyst complex component 3	O60645	191724
PEX10	Peroxisome biogenesis factor 10	O60683	66460.6
KPNA6	Importin subunit alpha-7	O60684	113756
UGDH	UDP-glucose 6-dehydrogenase	O60701	204618
CTNND1	Catenin delta-1	O60716	301662
ICMT	Protein-S-isoprenylcysteine O-methyltransferase	O60725	83425.8
EIF1B;EIF1	Eukaryotic translation initiation factor 1b;Eukaryotic translation initiation factor 1	O60739;P41567	16100.1
SNX2	Sorting nexin-2	O60749	83187.2
DPM1	Dolichol-phosphate mannosyltransferase subunit 1	O60762	756941
USO1	General vesicular transport factor p115	O60763	46169.5
TOM1	Target of Myb protein 1	O60784	22713.8
HIST1H2BK;H2BFS;HIST1H2BD;HIST1H2BC;HIST2H2BF;HIST1H2BH;HIST1H2BN;HIST1H2BM;HIST1H2BL	Histone H2B type 1-K;Histone H2B type F-S;Histone H2B type 1-D;Histone H2B type 1-C/E/F/G/I;Histone H2B type 2-F;Histone H2B type 1-H;Histone H2B type 1-N;Histone H2B type 1-M;Histone H2B type 1-L	O60814;P57053;P58876;P62807;Q5QNW6;Q93079;Q99877;Q99879;Q99880	738153
CCDC22	Coiled-coil domain-containing protein 22	O60826	45156.7
TIMM17B	Mitochondrial import inner membrane translocase subunit Tim17-B	O60830	195850
PRAF2	PRA1 family protein 2	O60831	991743
DKC1	H/ACA ribonucleoprotein complex subunit DKC1	O60832	70912.2
EIF5B	Eukaryotic translation initiation factor 5B	O60841	89364.1
DNAJA2	DnaJ homolog subfamily A member 2	O60884	1.21474e+06
OPHN1	Oligophrenin-1	O60890	20751.8
CTSV	Cathepsin L2	O60911	61403.1
CTNS	Cystinosin	O60931	53496.3
NBN	Nibrin	O60934	25790.8
RNGTT	mRNA-capping enzyme	O60942	36911.1
ABCB7	ATP-binding cassette sub-family B member 7, mitochondrial	O75027	133537
IGSF3	Immunoglobulin superfamily member 3	O75054	738172
FAM20B	Glycosaminoglycan xylosylkinase	O75063	29248
ADAM23	Disintegrin and metalloproteinase domain-containing protein 23	O75077	23190.2
WDR1	WD repeat-containing protein 1	O75083	35919.7
FZD7	Frizzled-7	O75084	40581.3
ATP9A	Probable phospholipid-transporting ATPase IIA	O75110	76977.1
ROCK2	Rho-associated protein kinase 2	O75116	12221.3
CLASP2	CLIP-associating protein 2	O75122	46157.5
PTCD1	Pentatricopeptide repeat-containing protein 1, mitochondrial	O75127	113603
CPNE3	Copine-3	O75131	79535.3
ATG13	Autophagy-related protein 13	O75143	18300.7
HIP1R	Huntingtin-interacting protein 1-related protein	O75146	62747.2
OBSL1	Obscurin-like protein 1	O75147	12738.3
RNF40	E3 ubiquitin-protein ligase BRE1B	O75150	10606.1
ZC3H11A	Zinc finger CCCH domain-containing protein 11A	O75152	94230.1
CLUH	Clustered mitochondria protein homolog	O75153	42044.4
CAND2	Cullin-associated NEDD8-dissociated protein 2	O75155	129666
DNAJC13	DnaJ homolog subfamily C member 13	O75165	11579.3
CNOT3	CCR4-NOT transcription complex subunit 3	O75175	38160.2
ANKRD17	Ankyrin repeat domain-containing protein 17	O75179	61312.7
SIN3B	Paired amphipathic helix protein Sin3b	O75182	5490.6
DNAJB6	DnaJ homolog subfamily B member 6	O75190	112604
PEX11A	Peroxisomal membrane protein 11A	O75192	37615.8
LRP5	Low-density lipoprotein receptor-related protein 5	O75197	7942.13
NDUFS7	NADH dehydrogenase [ubiquinone] iron-sulfur protein 7, mitochondrial	O75251	275533
NDUFS2	NADH dehydrogenase [ubiquinone] iron-sulfur protein 2, mitochondrial	O75306	324229
USP12;USP46	Ubiquitin carboxyl-terminal hydrolase 12;Ubiquitin carboxyl-terminal hydrolase 46	O75317;P62068	65551.1
CILP	Cartilage intermediate layer protein 1	O75339	13609.2
PDCD6	Programmed cell death protein 6	O75340	63787.9
ATP6V1G1	V-type proton ATPase subunit G 1	O75348	25893.6
VPS4B	Vacuolar protein sorting-associated protein 4B	O75351	79302.1
MPDU1	Mannose-P-dolichol utilization defect 1 protein	O75352	254113
ENTPD6	Ectonucleoside triphosphate diphosphohydrolase 6	O75354	47566.6
ENTPD5	Ectonucleoside triphosphate diphosphohydrolase 5	O75356	58169.7
H2AFY	Core histone macro-H2A.1	O75367	11201.7
FLNB	Filamin-B	O75369	18057.4
NDUFS6	NADH dehydrogenase [ubiquinone] iron-sulfur protein 6, mitochondrial	O75380	33800.1
SLC43A1	Large neutral amino acids transporter small subunit 3	O75387	69557.4
CS	Citrate synthase, mitochondrial	O75390	29226.2
SEC22B	Vesicle-trafficking protein SEC22b	O75396	129259
PRPF40A	Pre-mRNA-processing factor 40 homolog A	O75400	14012
CDC45	Cell division control protein 45 homolog	O75419	212249
FBXO24	F-box only protein 24	O75426	19817.4
MTX2	Metaxin-2	O75431	53674.9
VPS26A	Vacuolar protein sorting-associated protein 26A	O75436	18954.5
NDUFB1	NADH dehydrogenase [ubiquinone] 1 beta subcomplex subunit 1	O75438	13616.9
PMPCB	Mitochondrial-processing peptidase subunit beta	O75439	21548.8
MED24	Mediator of RNA polymerase II transcription subunit 24	O75448	22109.3
CRLF1	Cytokine receptor-like factor 1	O75462	19731.9
ERLIN1	Erlin-1	O75477	802418
NDUFS3	NADH dehydrogenase [ubiquinone] iron-sulfur protein 3, mitochondrial	O75489	344219
GMNN	Geminin	O75496	38225.9
CLN5	Ceroid-lipofuscinosis neuronal protein 5	O75503	1.58612e+06
TNFRSF21	Tumor necrosis factor receptor superfamily member 21	O75509	26409.4
ECI2	Enoyl-CoA delta isomerase 2, mitochondrial	O75521	102511
EED	Polycomb protein EED	O75530	19273.5
BANF1	Barrier-to-autointegration factor	O75531	87874.8
SF3B1	Splicing factor 3B subunit 1	O75533	564755
CSDE1	Cold shock domain-containing protein E1	O75534	242830
PRKRA	Interferon-inducible double-stranded RNA-dependent protein kinase activator A	O75569	18049.1
LRP6	Low-density lipoprotein receptor-related protein 6	O75581	81621.6
RPS6KA5	Ribosomal protein S6 kinase alpha-5	O75582	23102.6
GCAT	2-amino-3-ketobutyrate coenzyme A ligase, mitochondrial	O75600	130136
NPM3	Nucleoplasmin-3	O75607	110611
LYPLA1	Acyl-protein thioesterase 1	O75608	82983.5
ERAL1	GTPase Era, mitochondrial	O75616	96869.1
CREG1	Protein CREG1	O75629	879298
SNRNP200	U5 small nuclear ribonucleoprotein 200 kDa helicase	O75643	285614
TIPRL	TIP41-like protein	O75663	66042.1
PPM1B	Protein phosphatase 1B	O75688	28911.2
UTP20	Small subunit processome component 20 homolog	O75691	98505.1
NUP155	Nuclear pore complex protein Nup155	O75694	137283
RP2	Protein XRP2	O75695	78555
CRTAP	Cartilage-associated protein	O75718	1453728
SLC25A12	Calcium-binding mitochondrial carrier protein Aralar1	O75746	1.06628e+06
RAD51D	DNA repair protein RAD51 homolog 4	O75771	7462.59
ATP6AP2	Renin receptor	O75787	66123.6
RNASEH2A	Ribonuclease H2 subunit A	O75792	50635.7
CDC123	Cell division cycle protein 123 homolog	O75794	44160.7
PPP1R15A	Protein phosphatase 1 regulatory subunit 15A	O75807	31113.6
POP7	Ribonuclease P protein subunit p20	O75817	42745.2
EIF3G	Eukaryotic translation initiation factor 3 subunit G	O75821	253979
EIF3J	Eukaryotic translation initiation factor 3 subunit J	O75822	10796.9
PSMD10	26S proteasome non-ATPase regulatory subunit 10	O75832	127427
AP1G2	AP-1 complex subunit gamma-like 2	O75843	17060.2
ZMPSTE24	CAAX prenyl protease 1 homolog	O75844	46264.5
SCO1	Protein SCO1 homolog, mitochondrial	O75880	73027.4
ATRN	Attractin	O75882	545172
RBBP9	Putative hydrolase RBBP9	O75884	90982.8
DGAT1	Diacylglycerol O-acyltransferase 1	O75907	35654
ARL6IP5	PRA1 family protein 3	O75915	85981.2
SMNDC1	Survival of motor neuron-related-splicing factor 30	O75940	3947.56
ATP5PD	ATP synthase subunit d, mitochondrial	O75947	170975
FLOT1	Flotillin-1	O75955	35894.3
ATP5MG	ATP synthase subunit g, mitochondrial	O75964	360646
CPD	Carboxypeptidase D	O75976	364632
RSL1D1	Ribosomal L1 domain-containing protein 1	O76021	78121.3
WFS1	Wolframin	O76024	2.29293e+06
CLPX	ATP-dependent Clp protease ATP-binding subunit clpX-like, mitochondrial	O76031	568169
TM7SF2	Delta(14)-sterol reductase	O76062	49226.8
CIAO1	Probable cytosolic iron-sulfur protein assembly protein CIAO1	O76071	84850.7
SLC22A5	Solute carrier family 22 member 5	O76082	42656.6
SRP72	Signal recognition particle subunit SRP72	O76094	10302.9
JTB	Protein JTB	O76095	6823.49
B3GAT3	Galactosylgalactosylxylosylprotein 3-beta-glucuronosyltransferase 3	O94766	50314.2
MTA2	Metastasis-associated protein MTA2	O94776	102756
USP1	Ubiquitin carboxyl-terminal hydrolase 1	O94782	32047.9
ALDH1A2	Retinal dehydrogenase 2	O94788	54865.8
GFPT2	Glutamine--fructose-6-phosphate aminotransferase [isomerizing] 2	O94808	8583.63
SLIT2	Slit homolog 2 protein	O94813	224489
LTN1	E3 ubiquitin-protein ligase listerin	O94822	140571
TOMM70	Mitochondrial import receptor subunit TOM70	O94826	84805.6
IPO13	Importin-13	O94829	26417.1
MYO1D	Unconventional myosin-Id	O94832	110308
UFL1	E3 UFM1-protein ligase 1	O94874	130327
TMEM63A	CSC1-like protein 1	O94886	20926.8
LRIG2	Leucine-rich repeats and immunoglobulin-like domains protein 2	O94898	528323
SUN1	SUN domain-containing protein 1	O94901	93190.6
ERLIN2	Erlin-2	O94905	3307850
PRPF6	Pre-mRNA-processing factor 6	O94906	216932
ADGRL1	Adhesion G protein-coupled receptor L1	O94910	114805
FRYL	Protein furry homolog-like	O94915	18027.4
ENDOD1	Endonuclease domain-containing 1 protein	O94919	69973.2
GLCE	D-glucuronyl C5-epimerase	O94923	79441.3
FBXO21	F-box only protein 21	O94952	32497.9
KDM4B	Lysine-specific demethylase 4B	O94953	19532.2
USP19	Ubiquitin carboxyl-terminal hydrolase 19	O94966	79642.5
AP2A2	AP-2 complex subunit alpha-2	O94973	41188.1
SEC31A	Protein transport protein Sec31A	O94979	47709.9
DIRAS1	GTP-binding protein Di-Ras1	O95057	31875.6
RPP14	Ribonuclease P protein subunit p14	O95059	29045.2
YIF1A	Protein YIF1A	O95070	97517.9
UBR5	E3 ubiquitin-protein ligase UBR5	O95071	128764
SCAF4	Splicing factor, arginine/serine-rich 15	O95104	68548.7
MFN2	Mitofusin-2	O95140	83329.6
UBE4B	Ubiquitin conjugation factor E4 B	O95155	22523.2
NXPH4	Neurexophilin-4	O95158	171875
ZFPL1	Zinc finger protein-like 1	O95159	143841
ELP1	Elongator complex protein 1	O95163	161776
NDUFA3	NADH dehydrogenase [ubiquinone] 1 alpha subcomplex subunit 3	O95167	311339
NDUFB4	NADH dehydrogenase [ubiquinone] 1 beta subcomplex subunit 4	O95168	136839
NDUFA7	NADH dehydrogenase [ubiquinone] 1 alpha subcomplex subunit 7	O95182	15875.8
RTN3	Reticulon-3	O95197	229805
LETM1	Mitochondrial proton/calcium exchanger protein	O95202	17969.1
SNX4	Sorting nexin-4	O95219	54364.4
ZWINT	ZW10 interactor	O95229	101371
LUC7L3	Luc7-like protein 3	O95232	78553.5
KIF4A	Chromosome-associated kinesin KIF4A	O95239	22441.7
VAPB	Vesicle-associated membrane protein-associated protein B/C	O95292	56523.7
MPZL1	Myelin protein zero-like protein 1	O95297	108423
NDUFC2	NADH dehydrogenase [ubiquinone] 1 subunit C2	O95298	55341.4
NDUFA10	NADH dehydrogenase [ubiquinone] 1 alpha subcomplex subunit 10, mitochondrial	O95299	137381
FKBP9	Peptidyl-prolyl cis-trans isomerase FKBP9	O95302	153478
SMC2	Structural maintenance of chromosomes protein 2	O95347	486217
LYPLA2	Acyl-protein thioesterase 2	O95372	199924
IPO7	Importin-7	O95373	438863
PGM3	Phosphoacetylglucosamine mutase	O95394	359140
CD2BP2	CD2 antigen cytoplasmic tail-binding protein 2	O95400	196605
BRI3	Brain protein I3	O95415	46708.8
PIGN	GPI ethanolamine phosphate transferase 1	O95427	182068
BAG4	BAG family molecular chaperone regulator 4	O95429	11508.3
AHSA1	Activator of 90 kDa heat shock protein ATPase homolog 1	O95433	531284
PSMG1	Proteasome assembly chaperone 1	O95456	71976.8
LARGE1	LARGE xylosyl- and glucuronyltransferase 1	O95461	9322.43
SGPL1	Sphingosine-1-phosphate lyase 1	O95470	187225
CTDNEP1	CTD nuclear envelope phosphatase 1	O95476	131957
H6PD	GDH/6PGL endoplasmic bifunctional protein	O95479	635249
SEC24B	Protein transport protein Sec24B	O95487	26273.1
ADGRL2	Adhesion G protein-coupled receptor L2	O95490	894224
TDP2	Tyrosyl-DNA phosphodiesterase 2	O95551	40913.3
MPC2	Mitochondrial pyruvate carrier 2	O95563	135264
ACSL3	Long-chain-fatty-acid--CoA ligase 3	O95573	906134
POLR1A	DNA-directed RNA polymerase I subunit RPA1	O95602	70520.8
CPSF4	Cleavage and polyadenylation specificity factor subunit 4	O95639	19612
ASMTL	Probable bifunctional dTTP/UTP pyrophosphatase/methyltransferase protein	O95671	30664.8
CDS2	Phosphatidate cytidylyltransferase 2	O95674	283808
EYA4	Eyes absent homolog 4	O95677	1507.99
POP4	Ribonuclease P protein subunit p29	O95707	14370
HERC2	E3 ubiquitin-protein ligase HERC2	O95714	91449.4
OXSR1	Serine/threonine-protein kinase OSR1	O95747	103960
SEMA4F	Semaphorin-4F	O95754	39923.6
HSPA4L	Heat shock 70 kDa protein 4L	O95757	373999
STARD3NL	STARD3 N-terminal-like protein	O95772	114950
LSM8	U6 snRNA-associated Sm-like protein LSm8	O95777	26755
AP2A1	AP-2 complex subunit alpha-1	O95782	20832.7
WIZ	Protein Wiz	O95785	30459.8
TTC4	Tetratricopeptide repeat protein 4	O95801	417623
TMEM50A	Transmembrane protein 50A	O95807	45176.1
BAG2	BAG family molecular chaperone regulator 2	O95816	131557
BAG3	BAG family molecular chaperone regulator 3	O95817	68205
AIFM1	Apoptosis-inducing factor 1, mitochondrial	O95831	870390
LATS1	Serine/threonine-protein kinase LATS1	O95835	104482
TSPAN13	Tetraspanin-13	O95857	44533.7
ABHD16A	Protein ABHD16A	O95870	104644
OLFM2	Noelin-2	O95897	88317
TRUB2	Mitochondrial mRNA pseudouridine synthase TRUB2	O95900	78014.9
ECD	Protein ecdysoneless homolog	O95905	73873.4
RECK	Reversion-inducing cysteine-rich protein with Kazal motifs	O95980	11123.9
TOP3B	DNA topoisomerase 3-beta-1	O95985	17479.8
GAS8	Dynein regulatory complex subunit 4	O95995	151932
NDUFB10	NADH dehydrogenase [ubiquinone] 1 beta subcomplex subunit 10	O96000	45156.4
CLPTM1	Cleft lip and palate transmembrane protein 1	O96005	1.3253e+06
TOMM40	Mitochondrial import receptor subunit TOM40 homolog	O96008	298200
PEX11B	Peroxisomal membrane protein 11B	O96011	407588
WNT11	Protein Wnt-11	O96014	25456.5
ACTL6A	Actin-like protein 6A	O96019	56265.7
LDHA	L-lactate dehydrogenase A chain	P00338	828004
GLUD1	Glutamate dehydrogenase 1, mitochondrial	P00367	48417.4
DHFR	Dihydrofolate reductase	P00374	58024.8
CYB5R3	NADH-cytochrome b5 reductase 3	P00387	20514.8
GSR	Glutathione reductase, mitochondrial	P00390	38240.5
MT-CO2	Cytochrome c oxidase subunit 2	P00403	515735
MT-CO3	Cytochrome c oxidase subunit 3	P00414	22047.8
PNP	Purine nucleoside phosphorylase	P00491	21851.8
HPRT1	Hypoxanthine-guanine phosphoribosyltransferase	P00492	408507
EGFR	Epidermal growth factor receptor	P00533	266529
PGK1	Phosphoglycerate kinase 1	P00558	65076.9
F2	Prothrombin	P00734	122482
PLAT	Tissue-type plasminogen activator	P00750	45616.7
MT-ATP6	ATP synthase subunit a	P00846	78073.2
ASS1	Argininosuccinate synthase	P00966	107170
SERPINC1	Antithrombin-III	P01008	265707
SERPINA3	Alpha-1-antichymotrypsin	P01011	65126.6
A2M	Alpha-2-macroglobulin	P01023	1.91134e+06
C3	Complement C3	P01024	1.78e+06
TIMP1	Metalloproteinase inhibitor 1	P01033	113603
NRAS;HRAS	GTPase NRas;GTPase HRas	P01111;P01112	37925.5
LDLR	Low-density lipoprotein receptor	P01130	40787.1
TGFB1	Transforming growth factor beta-1 proprotein	P01137	392719
IGF2	Insulin-like growth factor II	P01344	23584.1
IGHG1	Immunoglobulin heavy constant gamma 1	P01857	1.03173e+06
HLA-B	HLA class I histocompatibility antigen, B-7 alpha chain	P01889	557841
HLA-A	HLA class I histocompatibility antigen, A-2 alpha chain	P01892	1.0001e+06
HLA-DRB1;HLA-DRB1;HLA-DPB1;HLA-DRB1;HLA-DRB1;HLA-DRB1	HLA class II histocompatibility antigen, DRB1-15 beta chain;HLA class II histocompatibility antigen, DRB1-3 chain;HLA class II histocompatibility antigen, DP beta 1 chain;HLA class II histocompatibility antigen, DRB1-11 beta chain;HLA class II histocompatibility antigen, DRB1-13 beta chain;HLA class II histocompatibility antigen, DRB1-12 beta chain	P01911;P01912;P04440;P20039;Q5Y7A7;Q95IE3	47224.6
HLA-DQB1	HLA class II histocompatibility antigen, DQ beta 1 chain	P01920	32927.9
HBD;HBB	Hemoglobin subunit delta;Hemoglobin subunit beta	P02042;P68871	1.75134e+06
COL4A1	Collagen alpha-1(IV) chain	P02462	26607.9
CRYAB	Alpha-crystallin B chain	P02511	13904.9
KRT14	Keratin, type I cytoskeletal 14	P02533	678469
KRT6A;KRT6C	Keratin, type II cytoskeletal 6A;Keratin, type II cytoskeletal 6C	P02538;P48668	375910
LMNA	Prelamin-A/C	P02545	54878
APOA1	Apolipoprotein A-I	P02647	14800.9
APOE	Apolipoprotein E	P02649	55920.1
FGB	Fibrinogen beta chain	P02675	34502.4
C9	Complement component C9	P02748	24174.2
FN1	Fibronectin	P02751	62071.7
AMBP	Protein AMBP	P02760	68393.8
AHSG	Alpha-2-HS-glycoprotein	P02765	1.01617e+06
ALB	Serum albumin	P02768	1.11944e+06
AFP	Alpha-fetoprotein	P02771	37373.3
GC	Vitamin D-binding protein	P02774	27810.7
TFRC	Transferrin receptor protein 1	P02786	2590187
LTF	Lactotransferrin	P02788	174879
FTH1	Ferritin heavy chain	P02794	11736.6
MT-ND1	NADH-ubiquinone oxidoreductase chain 1	P03886	68340.5
MT-ND3	NADH-ubiquinone oxidoreductase chain 3	P03897	274881
MT-ND4	NADH-ubiquinone oxidoreductase chain 4	P03905	76064.9
MT-ATP8	ATP synthase protein 8	P03928	36708.5
VTN	Vitronectin	P04004	1.04676e+06
HMGCR	3-hydroxy-3-methylglutaryl-coenzyme A reductase	P04035	89655.1
RAF1	RAF proto-oncogene serine/threonine-protein kinase	P04049	152386
GBA	Lysosomal acid glucosylceramidase	P04062	1.15141e+06
FUCA1	Tissue alpha-L-fucosidase	P04066	1275399
ALDOA	Fructose-bisphosphate aldolase A	P04075	108155
CSTB	Cystatin-B	P04080	136949
APOB	Apolipoprotein B-100	P04114	690128
NR3C1	Glucocorticoid receptor	P04150	6286.43
PRNP	Major prion protein	P04156	13469.7
OAT	Ornithine aminotransferase, mitochondrial	P04181	66622.8
TK1	Thymidine kinase, cytosolic	P04183	31823.4
KRT1	Keratin, type II cytoskeletal 1	P04264	2.00686e+06
VWF	von Willebrand factor	P04275	4246.13
TUBB4A	Tubulin beta-4A chain	P04350	228816
GAPDH	Glyceraldehyde-3-phosphate dehydrogenase	P04406	5498320
IGKV3-11	Immunoglobulin kappa variable 3-11	P04433	130414
CAPNS1	Calpain small subunit 1	P04632	39186.8
TP53	Cellular tumor antigen p53	P04637	47748.2
HSPB1	Heat shock protein beta-1	P04792	437014
TYMS	Thymidylate synthase	P04818	71705.2
RPN1	Dolichyl-diphosphooligosaccharide--protein glycosyltransferase subunit 1	P04843	26799390
RPN2	Dolichyl-diphosphooligosaccharide--protein glycosyltransferase subunit 2	P04844	2591244
GNAI2	Guanine nucleotide-binding protein G(i) subunit alpha-2	P04899	312784
HIST1H2AB;HIST1H2AG;HIST1H2AD;HIST3H2A;HIST1H2AC;HIST1H2AH;HIST1H2AJ;H2AFJ	Histone H2A type 1-B/E;Histone H2A type 1;Histone H2A type 1-D;Histone H2A type 3;Histone H2A type 1-C;Histone H2A type 1-H;Histone H2A type 1-J;Histone H2A.J	P04908;P0C0S8;P20671;Q7L7L0;Q93077;Q96KK5;Q99878;Q9BTM1	808760
SLC4A2	Anion exchange protein 2	P04920	127563
ATP1A1	Sodium/potassium-transporting ATPase subunit alpha-1	P05023	2.19149e+06
ATP1B1	Sodium/potassium-transporting ATPase subunit beta-1	P05026	147560
APP	Amyloid-beta precursor protein	P05067	58913.5
ALDH2	Aldehyde dehydrogenase, mitochondrial	P05091	37143.1
SLC25A5	ADP/ATP translocase 2	P05141	41626308
SERPINA5	Plasma serine protease inhibitor	P05154	20792.9
SERPING1	Plasma protease C1 inhibitor	P05155	119309
EIF2S1	Eukaryotic translation initiation factor 2 subunit 1	P05198	164848
HMGN2;HMGN3	Non-histone chromosomal protein HMG-17;High mobility group nucleosome-binding domain-containing protein 3	P05204;Q15651	111692
RPLP1	60S acidic ribosomal protein P1	P05386	187313
RPLP2	60S acidic ribosomal protein P2	P05387	336648
RPLP0	60S acidic ribosomal protein P0	P05388	565156
JUN	Transcription factor AP-1	P05412	99587.9
SSB	Lupus La protein	P05455	30886.9
ATP5MC1;ATP5MC3;ATP5MC2	ATP synthase F(0) complex subunit C1, mitochondrial;ATP synthase F(0) complex subunit C3, mitochondrial;ATP synthase F(0) complex subunit C2, mitochondrial	P05496;P48201;Q06055	18930.7
SERPINA7	Thyroxine-binding globulin	P05543	51305.6
SERPIND1	Heparin cofactor 2	P05546	43665.6
ITGB1	Integrin beta-1	P05556	691171
KRT8	Keratin, type II cytoskeletal 8	P05787	387626
INSR	Insulin receptor	P06213	139469
BCHE	Cholinesterase	P06276	409396
GLA	Alpha-galactosidase A	P06280	6101614
IGKV4-1	Immunoglobulin kappa variable 4-1	P06312	46221.8
RB1	Retinoblastoma-associated protein	P06400	52900.2
PTMA	Prothymosin alpha	P06454	86122.3
CDK1	Cyclin-dependent kinase 1	P06493	291237
ATP5F1B	ATP synthase subunit beta, mitochondrial	P06576	1.64694e+06
C2	Complement C2	P06681	82372.3
EIF4E	Eukaryotic translation initiation factor 4E	P06730	79951.2
CEACAM5	Carcinoembryonic antigen-related cell adhesion molecule 5	P06731	16651.6
ENO1	Alpha-enolase	P06733	88451.1
PYGL	Glycogen phosphorylase, liver form	P06737	182690
NPM1	Nucleophosmin	P06748	395378
TPM3	Tropomyosin alpha-3 chain	P06753	42983.7
ITGAV	Integrin alpha-V	P06756	288362
HEXA	Beta-hexosaminidase subunit alpha	P06865	2.08175e+06
HIST1H2BJ;HIST1H2BO;HIST1H2BB;HIST2H2BE	Histone H2B type 1-J;Histone H2B type 1-O;Histone H2B type 1-B;Histone H2B type 2-E	P06899;P23527;P33778;Q16778	29869.1
SERPINE2	Glia-derived nexin	P07093	72360.2
LDHB	L-lactate dehydrogenase B chain	P07195	321929
PROS1	Vitamin K-dependent protein S	P07225	27997.5
P4HB	Protein disulfide-isomerase	P07237	2.34613e+06
CTSD	Cathepsin D	P07339	8.03533e+06
ANXA2	Annexin A2	P07355	100922
CAPN1	Calpain-1 catalytic subunit	P07384	333398
TUBB	Tubulin beta chain	P07437	11950824
PRSS1;PRSS2;PRSS3P2	Trypsin-1;Trypsin-2;Putative trypsin-6	P07477;P07478;Q8NHM4	181909
PSAP	Prosaposin	P07602	321475
HEXB	Beta-hexosaminidase subunit beta	P07686	3.46175e+06
PFN1	Profilin-1	P07737	26079.1
APRT	Adenine phosphoribosyltransferase	P07741	168699
EPRS	Bifunctional glutamate/proline--tRNA ligase	P07814	1.0187e+06
CTSB	Cathepsin B	P07858	188820
HSP90AA1	Heat shock protein HSP 90-alpha	P07900	1.16189e+06
HNRNPC	Heterogeneous nuclear ribonucleoproteins C1/C2	P07910	473424
UQCRH	Cytochrome b-c1 complex subunit 6, mitochondrial	P07919	178324
LAMB1	Laminin subunit beta-1	P07942	2245703
YES1	Tyrosine-protein kinase Yes	P07947	24107.7
THBS1	Thrombospondin-1	P07996	250787
SP1	Transcription factor Sp1	P08047	30146.8
IGF1R	Insulin-like growth factor 1 receptor	P08069	106814
ANXA6	Annexin A6	P08133	16290.1
CD55	Complement decay-accelerating factor	P08174	28380.9
ABCB1	Multidrug resistance protein 1	P08183	27018.9
SLC3A2	4F2 cell-surface antigen heavy chain	P08195	856780
GUSB	Beta-glucuronidase	P08236	575122
PFKM	ATP-dependent 6-phosphofructokinase, muscle type	P08237	569114
HSP90AB1	Heat shock protein HSP 90-beta	P08238	3.99233e+06
SRPRA	Signal recognition particle receptor subunit alpha	P08240	113802
ASNS	Asparagine synthetase [glutamine-hydrolyzing]	P08243	340108
MME	Neprilysin	P08473	39528.2
INHBA	Inhibin beta A chain	P08476	4973.04
PDHA1	Pyruvate dehydrogenase E1 component subunit alpha, somatic form, mitochondrial	P08559	289771
COL4A2	Collagen alpha-2(IV) chain	P08572	158385
CYC1	Cytochrome c1, heme protein, mitochondrial	P08574	527496
SNRPB2	U2 small nuclear ribonucleoprotein B''	P08579	57845.9
MET	Hepatocyte growth factor receptor	P08581	182331
SNRNP70	U1 small nuclear ribonucleoprotein 70 kDa	P08621	152035
ITGA5	Integrin alpha-5	P08648	154506
VIM	Vimentin	P08670	470473
SERPINF2	Alpha-2-antiplasmin	P08697	352773
RPS17	40S ribosomal protein S17	P08708	350112
GNAI3	Guanine nucleotide-binding protein G(k) subunit alpha	P08754	31723.4
ANXA5	Annexin A5	P08758	22124
RPSA	40S ribosomal protein SA	P08865	562250
IL6R	Interleukin-6 receptor subunit alpha	P08887	8845.68
CD63	CD63 antigen	P08962	1.58474e+06
SNRPA	U1 small nuclear ribonucleoprotein A	P09012	117846
ACAA1	3-ketoacyl-CoA thiolase, peroxisomal	P09110	85030.8
SRP19	Signal recognition particle 19 kDa protein	P09132	16898
SNRPC	U1 small nuclear ribonucleoprotein C	P09234	82233
LGALS1	Galectin-1	P09382	8223
CLTA	Clathrin light chain A	P09496	68934.1
CNP	2',3'-cyclic-nucleotide 3'-phosphodiesterase	P09543	962542
HMOX1	Heme oxygenase 1	P09601	155201
DLD	Dihydrolipoyl dehydrogenase, mitochondrial	P09622	30898.3
HNRNPA1	Heterogeneous nuclear ribonucleoprotein A1	P09651	621812
SNRPA1	U2 small nuclear ribonucleoprotein A'	P09661	137815
COX6C	Cytochrome c oxidase subunit 6C	P09669	78412.4
PARP1	Poly [ADP-ribose] polymerase 1	P09874	327106
POLA1	DNA polymerase alpha catalytic subunit	P09884	118660
UCHL1	Ubiquitin carboxyl-terminal hydrolase isozyme L1	P09936	47887.5
FURIN	Furin	P09958	19535.7
LTA4H	Leukotriene A-4 hydrolase	P09960	28760.9
C4A	Complement C4-A	P0C0L4	124354
H2AFZ;H2AFV	Histone H2A.Z;Histone H2A.V	P0C0S5;Q71UI9	33606.6
ZNF883	Zinc finger protein 883	P0CG24	6907.02
POTEI	POTE ankyrin domain family member I	P0CG38	312711
UBB;UBC	Polyubiquitin-B;Polyubiquitin-C	P0CG47;P0CG48	43661.1
PET100	Protein PET100 homolog, mitochondrial	P0DJ07	145577
RGPD1;RGPD2	RANBP2-like and GRIP domain-containing protein 1;RANBP2-like and GRIP domain-containing protein 2	P0DJD0;P0DJD1	NaN
SETSIP;SET	Protein SETSIP;Protein SET	P0DME0;Q01105	140230
HSPA1A;HSPA1B	Heat shock 70 kDa protein 1A;Heat shock 70 kDa protein 1B	P0DMV8;P0DMV9	10470974
U2AF1L5;U2AF1	Splicing factor U2AF 35 kDa subunit-like protein;Splicing factor U2AF 35 kDa subunit	P0DN76;Q01081	79330.2
CBSL;CBS	Cystathionine beta-synthase-like protein;Cystathionine beta-synthase	P0DN79;P35520	56333.6
CALM1;CALM2;CALM3	Calmodulin-1;Calmodulin-2;Calmodulin-3	P0DP23;P0DP24;P0DP25	344206
POLR1D	DNA-directed RNA polymerases I and III subunit RPAC2	P0DPB6	41501.2
TUBA3C;TUBA3D	Tubulin alpha-3C chain;Tubulin alpha-3D chain	P0DPH7;P0DPH8	333238
TROVE2	60 kDa SS-A/Ro ribonucleoprotein	P10155	888937
MYBL2	Myb-related protein B	P10244	80692.5
GAA	Lysosomal alpha-glucosidase	P10253	3.67495e+06
HLA-C	HLA class I histocompatibility antigen, Cw-7 alpha chain	P10321	168367
ARAF	Serine/threonine-protein kinase A-Raf	P10398	134598
HIST1H1E	Histone H1.4	P10412	825433
DLAT	Dihydrolipoyllysine-residue acetyltransferase component of pyruvate dehydrogenase complex, mitochondrial	P10515	46590
PTPRF	Receptor-type tyrosine-protein phosphatase F	P10586	220196
NR2F1	COUP transcription factor 1	P10589	56437.3
TXN	Thioredoxin	P10599	766236
TGFB3	Transforming growth factor beta-3 proprotein	P10600	12417.3
COX5B	Cytochrome c oxidase subunit 5B, mitochondrial	P10606	68827.6
CTSA	Lysosomal protective protein	P10619	2567663
MGST1	Microsomal glutathione S-transferase 1	P10620	105512
C7	Complement component C7	P10643	69188.1
PRKAR1A	cAMP-dependent protein kinase type I-alpha regulatory subunit	P10644	33419.9
HSPD1	60 kDa heat shock protein, mitochondrial	P10809	1.4207e+06
CLU	Clusterin	P10909	582397
HSPA5	Endoplasmic reticulum chaperone BiP	P11021	1.64753e+06
LAMC1	Laminin subunit gamma-1	P11047	1.73808e+06
ACP2	Lysosomal acid phosphatase	P11117	1.63234e+06
HSPA8	Heat shock cognate 71 kDa protein	P11142	4041381
SLC2A1	Solute carrier family 2, facilitated glucose transporter member 1	P11166	313851
UMPS	Uridine 5'-monophosphate synthase	P11172	385339
PDHB	Pyruvate dehydrogenase E1 component subunit beta, mitochondrial	P11177	181755
PYGB	Glycogen phosphorylase, brain form	P11216	107129
RALA;RALB	Ras-related protein Ral-A;Ras-related protein Ral-B	P11233;P11234	61739.2
BCR	Breakpoint cluster region protein	P11274	82593.7
LAMP1	Lysosome-associated membrane glycoprotein 1	P11279	9697312
ACADM	Medium-chain specific acyl-CoA dehydrogenase, mitochondrial	P11310	260269
FGFR1	Fibroblast growth factor receptor 1	P11362	42915.8
TOP2A	DNA topoisomerase 2-alpha	P11388	53510.1
G6PD	Glucose-6-phosphate 1-dehydrogenase	P11413	64741.1
UBL4A	Ubiquitin-like protein 4A	P11441	390542
PC	Pyruvate carboxylase, mitochondrial	P11498	19376.6
DMD	Dystrophin	P11532	5639.33
MTHFD1	C-1-tetrahydrofolate synthase, cytoplasmic	P11586	1.22344e+06
IGF2R	Cation-independent mannose-6-phosphate receptor	P11717	7153199
ADH5	Alcohol dehydrogenase class-3	P11766	25186.9
CDK4	Cyclin-dependent kinase 4	P11802	172479
PRPS2	Ribose-phosphate pyrophosphokinase 2	P11908	87167.9
PABPC1	Polyadenylate-binding protein 1	P11940	238257
PCNA	Proliferating cell nuclear antigen	P12004	833097
HARS	Histidine--tRNA ligase, cytoplasmic	P12081	50654.9
COL6A1	Collagen alpha-1(VI) chain	P12109	388655
COL6A2	Collagen alpha-2(VI) chain	P12110	52493.9
SLC25A4	ADP/ATP translocase 1	P12235	2416351
SLC25A6	ADP/ATP translocase 3	P12236	8888890
F5	Coagulation factor V	P12259	3.75165e+06
IMPDH2	Inosine-5'-monophosphate dehydrogenase 2	P12268	434878
CKB	Creatine kinase B-type	P12277	103404
CKMT1A	Creatine kinase U-type, mitochondrial	P12532	48870.1
BCKDHA	2-oxoisovalerate dehydrogenase subunit alpha, mitochondrial	P12694	34181.6
SRC	Proto-oncogene tyrosine-protein kinase Src	P12931	87015.7
XRCC6	X-ray repair cross-complementing protein 6	P12956	237678
XRCC5	X-ray repair cross-complementing protein 5	P13010	157398
COX4I1	Cytochrome c oxidase subunit 4 isoform 1, mitochondrial	P13073	80595.9
IFI30	Gamma-interferon-inducible lysosomal thiol reductase	P13284	30879.3
LAMP2	Lysosome-associated membrane glycoprotein 2	P13473	6349262
RNH1	Ribonuclease inhibitor	P13489	156420
BMP1	Bone morphogenetic protein 1	P13497	23388.1
CYBA	Cytochrome b-245 light chain	P13498	618955
NCAM1	Neural cell adhesion molecule 1	P13591	64441.7
ITGA4	Integrin alpha-4	P13612	96552.6
EEF2	Elongation factor 2	P13639	1.37287e+06
KRT10	Keratin, type I cytoskeletal 10	P13645	642437
KRT5	Keratin, type II cytoskeletal 5	P13647	237807
PDIA4	Protein disulfide-isomerase A4	P13667	164179
P4HA1	Prolyl 4-hydroxylase subunit alpha-1	P13674	1.51876e+06
HLA-E	HLA class I histocompatibility antigen, alpha chain E	P13747	7698.22
PLS3	Plastin-3	P13797	201417
ETFA	Electron transfer flavoprotein subunit alpha, mitochondrial	P13804	48290.9
GYS1	Glycogen [starch] synthase, muscle	P13807	120690
PRKAR2A	cAMP-dependent protein kinase type II-alpha regulatory subunit	P13861	45917.8
ENO3	Beta-enolase	P13929	156640
CD59	CD59 glycoprotein	P13987	11221.2
MTHFD2	Bifunctional methylenetetrahydrofolate dehydrogenase/cyclohydrolase, mitochondrial	P13995	2.14222e+06
EDN3	Endothelin-3	P14138	60850.1
MIF	Macrophage migration inhibitory factor	P14174	251485
CD99	CD99 antigen	P14209	52824.7
HGF	Hepatocyte growth factor	P14210	36272.7
PRKCSH	Glucosidase 2 subunit beta	P14314	458854
FDPS	Farnesyl pyrophosphate synthase	P14324	83526.6
COX7A2	Cytochrome c oxidase subunit 7A2, mitochondrial	P14406	436643
NID1	Nidogen-1	P14543	450657
PKM	Pyruvate kinase PKM	P14618	346597
HSP90B1	Endoplasmin	P14625	1.54888e+06
CCNB1	G2/mitotic-specific cyclin-B1	P14635	38772.6
SNRPB;SNRPN	Small nuclear ribonucleoprotein-associated proteins B and B';Small nuclear ribonucleoprotein-associated protein N	P14678;P63162	838692
IDE	Insulin-degrading enzyme	P14735	59259.1
HNRNPL	Heterogeneous nuclear ribonucleoprotein L	P14866	130630
DARS	Aspartate--tRNA ligase, cytoplasmic	P14868	867731
JUP	Junction plakoglobin	P14923	53704.7
GLUL	Glutamine synthetase	P15104	16242.5
PVR	Poliovirus receptor	P15151	253116
GSPT1	Eukaryotic peptide chain release factor GTP-binding subunit ERF3A	P15170	215231
IFNGR1	Interferon gamma receptor 1	P15260	44301.6
ARSA	Arylsulfatase A	P15289	341792
EZR	Ezrin	P15311	15049.5
CD46	Membrane cofactor protein	P15529	155041
NME1	Nucleoside diphosphate kinase A	P15531	179147
GNS	N-acetylglucosamine-6-sulfatase	P15586	13081909
PHKG2	Phosphorylase b kinase gamma catalytic chain, liver/testis isoform	P15735	66205.5
ARSB	Arylsulfatase B	P15848	495235
RPS2	40S ribosomal protein S2	P15880	1.12494e+06
DSP	Desmoplakin	P15924	114795
RPA2	Replication protein A 32 kDa subunit	P15927	55854.5
CBR1	Carbonyl reductase [NADPH] 1	P16152	86356.2
GLB1	Beta-galactosidase	P16278	3.61762e+06
PPP3CB	Serine/threonine-protein phosphatase 2B catalytic subunit beta isoform	P16298	38819.4
GCFC2	GC-rich sequence DNA-binding factor 2	P16383	52405
HIST1H1C	Histone H1.2	P16403	762541
POR	NADPH--cytochrome P450 reductase	P16435	24711.2
ATP2A2	Sarcoplasmic/endoplasmic reticulum calcium ATPase 2	P16615	1.04334e+06
YBX3	Y-box-binding protein 3	P16989	154521
ZNF3	Zinc finger protein 3	P17036	5141.28
ZNF30;ZFP82;ZNF461;ZFP14;ZFP30	Zinc finger protein 30;Zinc finger protein 82 homolog;Zinc finger protein 461;Zinc finger protein 14 homolog;Zinc finger protein 30 homolog	P17039;Q8N141;Q8TAF7;Q9HCL3;Q9Y2G7	127950
NAGA	Alpha-N-acetylgalactosaminidase	P17050	82737.6
HSPA6	Heat shock 70 kDa protein 6	P17066	670856
TMEM11	Transmembrane protein 11, mitochondrial	P17152	162468
ITGA2	Integrin alpha-2	P17301	127723
GJA1	Gap junction alpha-1 protein	P17302	34597
SMPD1	Sphingomyelin phosphodiesterase	P17405	102455
CAPN2	Calpain-2 catalytic subunit	P17655	561283
CTPS1	CTP synthase 1	P17812	629392
DDX5	Probable ATP-dependent RNA helicase DDX5	P17844	1.07643e+06
PFKL	ATP-dependent 6-phosphofructokinase, liver type	P17858	1.3879e+06
PSMC3	26S proteasome regulatory subunit 6A	P17980	647892
TCP1	T-complex protein 1 subunit alpha	P17987	2.83631e+06
PTPN1	Tyrosine-protein phosphatase non-receptor type 1	P18031	300950
ERCC2	General transcription and DNA repair factor IIH helicase subunit XPD	P18074	50267.4
RPL35A	60S ribosomal protein L35a	P18077	285074
ITGB5	Integrin beta-5	P18084	160695
ARF4	ADP-ribosylation factor 4	P18085	514338
RPL7	60S ribosomal protein L7	P18124	666761
VCL	Vinculin	P18206	150484
NAT1	Arylamine N-acetyltransferase 1	P18440	8857.35
SON	Protein SON	P18583	27774
NELFE	Negative elongation factor E	P18615	22691.7
RPL17	60S ribosomal protein L17	P18621	294296
RCC1	Regulator of chromosome condensation	P18754	82925.3
ATF6	Cyclic AMP-dependent transcription factor ATF-6 alpha	P18850	112775
LIG1	DNA ligase 1	P18858	15879.2
XRCC1	DNA repair protein XRCC1	P18887	123438
CDH2	Cadherin-2	P19022	150976
CD58	Lymphocyte function-associated antigen 3	P19256	33230.1
NCL	Nucleolin	P19338	233513
HK1	Hexokinase-1	P19367	4518420
POLR2C	DNA-directed RNA polymerase II subunit RPB3	P19387	39078
POLR2E	DNA-directed RNA polymerases I, II, and III subunit RPABC1	P19388	155746
NDUFV2	NADH dehydrogenase [ubiquinone] flavoprotein 2, mitochondrial	P19404	75053.8
TNFRSF1A	Tumor necrosis factor receptor superfamily member 1A	P19438	2253.21
ERCC3	General transcription and DNA repair factor IIH helicase subunit XPB	P19447	7497.1
EIF2AK2	Interferon-induced, double-stranded RNA-activated protein kinase	P19525	26708.1
SRM	Spermidine synthase	P19623	408482
ITIH2	Inter-alpha-trypsin inhibitor heavy chain H2	P19823	110343
ATP2B1	Plasma membrane calcium-transporting ATPase 1	P20020	363433
CR2	Complement receptor type 2	P20023	15044.7
EIF2S2	Eukaryotic translation initiation factor 2 subunit 2	P20042	81562.7
TBP	TATA-box-binding protein	P20226	83523.6
RAB5A	Ras-related protein Rab-5A	P20339	139890
RAB6A;RAB6B	Ras-related protein Rab-6A;Ras-related protein Rab-6B	P20340;Q9NRW1	23188.8
MSH3	DNA mismatch repair protein Msh3	P20585	31055.6
PSMB1	Proteasome subunit beta type-1	P20618	1.35691e+06
M6PR	Cation-dependent mannose-6-phosphate receptor	P20645	3.17204e+06
LMNB1	Lamin-B1	P20700	241298
PZP	Pregnancy zone protein	P20742	1.05193e+06
IMPDH1	Inosine-5'-monophosphate dehydrogenase 1	P20839	87260.6
AGA	N(4)-(beta-N-acetylglucosaminyl)-L-asparaginase	P20933	227518
GSTM3	Glutathione S-transferase Mu 3	P21266	13819.5
ATP6V1B2	V-type proton ATPase subunit B, brain isoform	P21281	30970.2
FLNA	Filamin-A	P21333	80699.3
NF1	Neurofibromin	P21359	220530
SAT1	Diamine acetyltransferase 1	P21673	11808.2
VDAC1	Voltage-dependent anion-selective channel protein 1	P21796	272835
SDHB	Succinate dehydrogenase [ubiquinone] iron-sulfur subunit, mitochondrial	P21912	257696
COMT	Catechol O-methyltransferase	P21964	148960
PCMT1	Protein-L-isoaspartate(D-aspartate) O-methyltransferase	P22061	266201
FBL	rRNA 2'-O-methyltransferase fibrillarin	P22087	2.1083e+06
GART	Trifunctional purine biosynthetic protein adenosine-3	P22102	799605
PAICS	Multifunctional protein ADE2	P22234	132784
IDS	Iduronate 2-sulfatase	P22304	61542.6
UBA1	Ubiquitin-like modifier-activating enzyme 1	P22314	146571
NME2	Nucleoside diphosphate kinase B	P22392	993790
ENPP1	Ectonucleotide pyrophosphatase/phosphodiesterase family member 1	P22413	516024
KCNA5	Potassium voltage-gated channel subfamily A member 5	P22460	201510400
HNRNPA2B1	Heterogeneous nuclear ribonucleoproteins A2/B1	P22626	843221
PRKACB	cAMP-dependent protein kinase catalytic subunit beta	P22694	27115.7
UQCRC2	Cytochrome b-c1 complex subunit 2, mitochondrial	P22695	310125
FECH	Ferrochelatase, mitochondrial	P22830	374303
FBLN1	Fibulin-1	P23142	49745.7
TCEA1	Transcription elongation factor A protein 1	P23193	20663.9
ITGA6	Integrin alpha-6	P23229	135163
SFPQ	Splicing factor, proline- and glutamine-rich	P23246	187750
TUBG1	Tubulin gamma-1 chain	P23258	101346
PPIB	Peptidyl-prolyl cis-trans isomerase B	P23284	773775
WARS	Tryptophan--tRNA ligase, cytoplasmic	P23381	39523.2
RPS3	40S ribosomal protein S3	P23396	10625948
RPS6KB1	Ribosomal protein S6 kinase beta-1	P23443	120120
JAK1	Tyrosine-protein kinase JAK1	P23458	84323.3
PTPRG	Receptor-type tyrosine-protein phosphatase gamma	P23470	55634.8
AHCY	Adenosylhomocysteinase	P23526	87655.8
CFL1	Cofilin-1	P23528	3.64635e+06
EIF4B	Eukaryotic translation initiation factor 4B	P23588	58093.5
F8A1	Factor VIII intron 22 protein	P23610	106521
ATP2B4	Plasma membrane calcium-transporting ATPase 4	P23634	320767
DTYMK	Thymidylate kinase	P23919	37020
RRM1	Ribonucleoside-diphosphate reductase large subunit	P23921	136815
LAMA2	Laminin subunit alpha-2	P24043	5710.71
KDELR1	ER lumen protein-retaining receptor 1	P24390	227298
NR2F2	COUP transcription factor 2	P24468	234659
EEF1B2	Elongation factor 1-beta	P24534	202548
ATP5PB	ATP synthase F(0) complex subunit B1, mitochondrial	P24539	150256
ACP1	Low molecular weight phosphotyrosine protein phosphatase	P24666	3.58651e+06
ACAT1	Acetyl-CoA acetyltransferase, mitochondrial	P24752	125483
TNC	Tenascin	P24821	57847.3
POLR2A	DNA-directed RNA polymerase II subunit RPB1	P24928	60059.1
CDK2	Cyclin-dependent kinase 2	P24941	252763
F2R	Proteinase-activated receptor 1	P25116	19594.6
MCM3	DNA replication licensing factor MCM3	P25205	1.06879e+06
MPST	3-mercaptopyruvate sulfurtransferase	P25325	20228.2
LAMA1	Laminin subunit alpha-1	P25391	47561.6
RPS12	40S ribosomal protein S12	P25398	9413649
FAS	Tumor necrosis factor receptor superfamily member 6	P25445	21112.5
YY1	Transcriptional repressor protein YY1	P25490	29694.9
DNAJB1	DnaJ homolog subfamily B member 1	P25685	129648
DNAJB2	DnaJ homolog subfamily B member 2	P25686	19152.1
ATP5F1A	ATP synthase subunit alpha, mitochondrial	P25705	6989754
PSMA1	Proteasome subunit alpha type-1	P25786	605415
PSMA2	Proteasome subunit alpha type-2	P25787	395220
PSMA3	Proteasome subunit alpha type-3	P25788	447492
PSMA4	Proteasome subunit alpha type-4	P25789	1.10015e+06
ITGA3	Integrin alpha-3	P26006	22410.6
DDX6	Probable ATP-dependent RNA helicase DDX6	P26196	139652
DNMT1	DNA (cytosine-5)-methyltransferase 1	P26358	158151
U2AF2	Splicing factor U2AF 65 kDa subunit	P26368	91723.6
RPL13	60S ribosomal protein L13	P26373	1323951
PTBP1	Polypyrimidine tract-binding protein 1	P26599	143034
TARS	Threonine--tRNA ligase, cytoplasmic	P26639	364998
VARS	Valine--tRNA ligase	P26640	134481
EEF1G	Elongation factor 1-gamma	P26641	1.49074e+06
STOM	Erythrocyte band 7 integral membrane protein	P27105	286335
YWHAQ	14-3-3 protein theta	P27348	639818
MAPK3	Mitogen-activated protein kinase 3	P27361	53473.2
DPP4	Dipeptidyl peptidase 4	P27487	6038.45
CERS1	Ceramide synthase 1	P27544	182019
RPL10	60S ribosomal protein L10	P27635	657626
RPA1	Replication protein A 70 kDa DNA-binding subunit	P27694	79539.7
CAD	CAD protein	P27708	1.59722e+06
CALR	Calreticulin	P27797	196929
MAP4	Microtubule-associated protein 4	P27816	58348.1
CANX	Calnexin	P27824	808994
PSMA5	Proteasome subunit alpha type-5	P28066	1.09721e+06
PSMB4	Proteasome subunit beta type-4	P28070	558371
PSMB6	Proteasome subunit beta type-6	P28072	476630
PSMB5	Proteasome subunit beta type-5	P28074	1.02969e+06
ABCD3	ATP-binding cassette sub-family D member 3	P28288	704860
LOX	Protein-lysine 6-oxidase	P28300	70367
NDUFS1	NADH-ubiquinone oxidoreductase 75 kDa subunit, mitochondrial	P28331	163540
POLD1	DNA polymerase delta catalytic subunit	P28340	1.21104e+06
SMARCA1	Probable global transcription activator SNF2L1	P28370	9698.96
MAPK1	Mitogen-activated protein kinase 1	P28482	327716
DUSP1	Dual specificity protein phosphatase 1	P28562	91481.3
GRN	Progranulin	P28799	867714
LAP3	Cytosol aminopeptidase	P28838	10350.6
PCSK6	Proprotein convertase subtilisin/kexin type 6	P29122	183657
TPP2	Tripeptidyl-peptidase 2	P29144	7604.98
EPHA2	Ephrin type-A receptor 2	P29317	39136.9
EPHB2	Ephrin type-B receptor 2	P29323	5351.85
TKT	Transketolase	P29401	56855.8
PML	Protein PML	P29590	18518
TYK2	Non-receptor tyrosine-protein kinase TYK2	P29597	90031.6
EEF1D	Elongation factor 1-delta	P29692	84188.6
MARCKS	Myristoylated alanine-rich C-kinase substrate	P29966	28412.7
PRDX6	Peroxiredoxin-6	P30041	427387
PRDX5	Peroxiredoxin-5, mitochondrial	P30044	65844.9
PRDX3	Thioredoxin-dependent peroxide reductase, mitochondrial	P30048	38050.6
ATP5F1D	ATP synthase subunit delta, mitochondrial	P30049	99727
RPL12	60S ribosomal protein L12	P30050	603845
ECHS1	Enoyl-CoA hydratase, mitochondrial	P30084	36489.9
CMPK1	UMP-CMP kinase	P30085	22030.5
PDIA3	Protein disulfide-isomerase A3	P30101	346361
PPP2R1A	Serine/threonine-protein phosphatase 2A 65 kDa regulatory subunit A alpha isoform	P30153	555013
PPP2R1B	Serine/threonine-protein phosphatase 2A 65 kDa regulatory subunit A beta isoform	P30154	206073
CDC25C	M-phase inducer phosphatase 3	P30307	28062.4
HLA-F	HLA class I histocompatibility antigen, alpha chain F	P30511	2733.13
HMOX2	Heme oxygenase 2	P30519	40035.5
ADSS	Adenylosuccinate synthetase isozyme 2	P30520	116746
CHRNA5	Neuronal acetylcholine receptor subunit alpha-5	P30532	265797
LRPAP1	Alpha-2-macroglobulin receptor-associated protein	P30533	125757
TSPO	Translocator protein	P30536	217319
ADSL	Adenylosuccinate lyase	P30566	30000.7
SRI	Sorcin	P30626	28189
SLC7A1	High affinity cationic amino acid transporter 1	P30825	107300
ALDH1B1	Aldehyde dehydrogenase X, mitochondrial	P30837	163002
POLR2B	DNA-directed RNA polymerase II subunit RPB2	P30876	184537
SDHA	Succinate dehydrogenase [ubiquinone] flavoprotein subunit, mitochondrial	P31040	293360
MAT2A	S-adenosylmethionine synthase isoform type-2	P31153	196391
RRM2	Ribonucleoside-diphosphate reductase subunit M2	P31350	99201
TIA1	Nucleolysin TIA-1 isoform p40	P31483	28311.5
SLC6A6	Sodium- and chloride-dependent taurine transporter	P31641	35548.8
DNAJA1	DnaJ homolog subfamily A member 1	P31689	1.5172e+06
UQCRC1	Cytochrome b-c1 complex subunit 1, mitochondrial	P31930	28506.2
ATIC	Bifunctional purine biosynthesis protein PURH	P31939	54106.7
HNRNPH3	Heterogeneous nuclear ribonucleoprotein H3	P31942	63628.6
HNRNPH1	Heterogeneous nuclear ribonucleoprotein H	P31943	1.04694e+06
YWHAB	14-3-3 protein beta/alpha	P31946	1.82036e+06
STIP1	Stress-induced-phosphoprotein 1	P31948	136795
PRDX2	Peroxiredoxin-2	P32119	266639
ARRB2	Beta-arrestin-2	P32121	63226.8
GK	Glycerol kinase	P32189	75313
PYCR1	Pyrroline-5-carboxylate reductase 1, mitochondrial	P32322	62380.8
RPL9	60S ribosomal protein L9	P32969	52452.6
ACSL1	Long-chain-fatty-acid--CoA ligase 1	P33121	94293.5
KIF5B	Kinesin-1 heavy chain	P33176	90313.5
CSTF2	Cleavage stimulation factor subunit 2	P33240	68302.2
DUT	Deoxyuridine 5'-triphosphate nucleotidohydrolase, mitochondrial	P33316	46328.4
ABCC1	Multidrug resistance-associated protein 1	P33527	266866
KDELR2	ER lumen protein-retaining receptor 2	P33947	16413.7
TTK	Dual specificity protein kinase TTK	P33981	26557.3
MCM4	DNA replication licensing factor MCM4	P33991	271990
MCM5	DNA replication licensing factor MCM5	P33992	893500
MCM7	DNA replication licensing factor MCM7	P33993	873154
GALNS	N-acetylgalactosamine-6-sulfatase	P34059	129333
SHMT1	Serine hydroxymethyltransferase, cytosolic	P34896	134674
SHMT2	Serine hydroxymethyltransferase, mitochondrial	P34897	136898
HSPA4	Heat shock 70 kDa protein 4	P34932	159878
MPI	Mannose-6-phosphate isomerase	P34949	20063.6
PFN2	Profilin-2	P35080	82033.8
CTNNA1	Catenin alpha-1	P35221	1.1815e+06
CTNNB1	Catenin beta-1	P35222	174798
PHB	Prohibitin	P35232	533020
SERPINB6	Serpin B6	P35237	77517.8
RPA3	Replication protein A 14 kDa subunit	P35244	44719.8
RFC4	Replication factor C subunit 4	P35249	269845
RFC2	Replication factor C subunit 2	P35250	327143
RPL22	60S ribosomal protein L22	P35268	357945
GTF2F1	General transcription factor IIF subunit 1	P35269	35599.4
PTGS2	Prostaglandin G/H synthase 2	P35354	14060.3
THBS2	Thrombospondin-2	P35442	17130.8
THBS4	Thrombospondin-4	P35443	72356.7
IDUA	Alpha-L-iduronidase	P35475	318159
KRT9	Keratin, type I cytoskeletal 9	P35527	997224
FBN1	Fibrillin-1	P35555	327262
FBN2	Fibrillin-2	P35556	258273
AGL	Glycogen debranching enzyme	P35573	201636
MYH9	Myosin-9	P35579	26166
COPB2	Coatomer subunit beta'	P35606	335778
SOAT1	Sterol O-acyltransferase 1	P35610	81185.2
ADD2	Beta-adducin	P35612	29016.3
BSG	Basigin	P35613	2.56025e+06
TIMP3	Metalloproteinase inhibitor 3	P35625	36482.5
FUS	RNA-binding protein FUS	P35637	167516
DEK	Protein DEK	P35659	45504.9
ATP7B	Copper-transporting ATPase 2	P35670	23808.1
KRT2	Keratin, type II cytoskeletal 2 epidermal	P35908	1.13674e+06
PSMC2	26S proteasome regulatory subunit 7	P35998	265649
SLC16A2	Monocarboxylate transporter 8	P36021	70770
GJC1	Gap junction gamma-1 protein	P36383	5604.49
MAP2K2	Dual specificity mitogen-activated protein kinase kinase 2	P36507	18328.6
ATP5F1C	ATP synthase subunit gamma, mitochondrial	P36542	3789383
CPOX	Oxygen-dependent coproporphyrinogen-III oxidase, mitochondrial	P36551	45263.2
RPL4	60S ribosomal protein L4	P36578	388076
PPP1CC	Serine/threonine-protein phosphatase PP1-gamma catalytic subunit	P36873	177623
TGFBR1	TGF-beta receptor type-1	P36897	18056.4
SRP14	Signal recognition particle 14 kDa protein	P37108	46359.8
NUP62	Nuclear pore glycoprotein p62	P37198	33664.7
HPCAL1;NCALD;HPCA	Hippocalcin-like protein 1;Neurocalcin-delta;Neuron-specific calcium-binding protein hippocalcin	P37235;P61601;P84074	13315.5
FDFT1	Squalene synthase	P37268	153152
PIGA	Phosphatidylinositol N-acetylglucosaminyltransferase subunit A	P37287	4104.9
TAGLN2	Transgelin-2	P37802	7131.23
ETFB	Electron transfer flavoprotein subunit beta	P38117	143450
RBMX	RNA-binding motif protein, X chromosome	P38159	110141
COIL	Coilin	P38432	10987.7
GGCX	Vitamin K-dependent gamma-carboxylase	P38435	1653003
LIPA	Lysosomal acid lipase/cholesteryl ester hydrolase	P38571	798361
ATP6V1A	V-type proton ATPase catalytic subunit A	P38606	245378
HSPA9	Stress-70 protein, mitochondrial	P38646	727692
EIF4A3	Eukaryotic initiation factor 4A-III	P38919	435678
IGHMBP2	DNA-binding protein SMUBP-2	P38935	4713.05
RPS19	40S ribosomal protein S19	P39019	217660
RPL3	60S ribosomal protein L3	P39023	426457
COL18A1	Collagen alpha-1(XVIII) chain	P39060	7520.39
MPV17	Protein Mpv17	P39210	55751.7
DDOST	Dolichyl-diphosphooligosaccharide--protein glycosyltransferase 48 kDa subunit	P39656	3.7262e+06
FEN1	Flap endonuclease 1	P39748	146511
IL6ST	Interleukin-6 receptor subunit beta	P40189	214589
TXLNA	Alpha-taxilin	P40222	87667.7
CCT6A	T-complex protein 1 subunit zeta	P40227	1.62407e+06
NNMT	Nicotinamide N-methyltransferase	P40261	629580
PBX1	Pre-B-cell leukemia transcription factor 1	P40424	55348.7
PBX2	Pre-B-cell leukemia transcription factor 2	P40425	3722.15
RPL13A	60S ribosomal protein L13a	P40429	469775
ARL1	ADP-ribosylation factor-like protein 1	P40616	172364
MLH1	DNA mismatch repair protein Mlh1	P40692	49700.8
PEX19	Peroxisomal biogenesis factor 19	P40855	9431.79
MDH2	Malate dehydrogenase, mitochondrial	P40926	83608.1
RFC5	Replication factor C subunit 5	P40937	429383
RFC3	Replication factor C subunit 3	P40938	408852
HADHA	Trifunctional enzyme subunit alpha, mitochondrial	P40939	249831
EIF2S3	Eukaryotic translation initiation factor 2 subunit 3	P41091	348699
EIF2D	Eukaryotic translation initiation factor 2D	P41214	210198
WNT5A	Protein Wnt-5a	P41221	17283.8
NAA10	N-alpha-acetyltransferase 10	P41227	68802.4
KDM5C	Lysine-specific demethylase 5C	P41229	18732.7
CSK	Tyrosine-protein kinase CSK	P41240	20499.8
GARS	Glycine--tRNA ligase	P41250	324142
IARS	Isoleucine--tRNA ligase, cytoplasmic	P41252	641518
SLC19A1	Folate transporter 1	P41440	99347.7
PRKCI	Protein kinase C iota type	P41743	28479
ACTR1B	Beta-centractin	P42025	44206.6
TMPO	Lamina-associated polypeptide 2, isoform alpha	P42166	880091
TMPO	Lamina-associated polypeptide 2, isoforms beta/gamma	P42167	191033
STAT1	Signal transducer and activator of transcription 1-alpha/beta	P42224	119072
MTREX	Exosome RNA helicase MTR4	P42285	80016.4
MTOR	Serine/threonine-protein kinase mTOR	P42345	119718
PI4KA	Phosphatidylinositol 4-kinase alpha	P42356	61771
CASP3	Caspase-3	P42574	56246.6
RPS27	40S ribosomal protein S27	P42677	1.12915e+06
ABL2	Tyrosine-protein kinase ABL2	P42684	21003.2
NCAPD3	Condensin-2 complex subunit D3	P42695	229821
LIFR	Leukemia inhibitory factor receptor	P42702	84938
LRPPRC	Leucine-rich PPR motif-containing protein, mitochondrial	P42704	868916
ACAA2	3-ketoacyl-CoA thiolase, mitochondrial	P42765	30783.2
RPL35	60S ribosomal protein L35	P42766	157880
CDKN2A	Cyclin-dependent kinase inhibitor 2A	P42771	173743
CDKN2C	Cyclin-dependent kinase 4 inhibitor C	P42773	72177.8
PRCP	Lysosomal Pro-X carboxypeptidase	P42785	5760631
HTT	Huntingtin	P42858	69606.5
ECE1	Endothelin-converting enzyme 1	P42892	76682.2
SLC1A3	Excitatory amino acid transporter 1	P43003	81080.2
SLC1A4	Neutral amino acid transporter A	P43007	65062.7
MCAM	Cell surface glycoprotein MUC18	P43121	521522
CRAT	Carnitine O-acetyltransferase	P43155	259308
MATR3	Matrin-3	P43243	155546
MSH2	DNA mismatch repair protein Msh2	P43246	173932
BTD	Biotinidase	P43251	348619
GPD2	Glycerol-3-phosphate dehydrogenase, mitochondrial	P43304	32053.6
SSR1	Translocon-associated protein subunit alpha	P43307	3.40926e+06
PTPN9	Tyrosine-protein phosphatase non-receptor type 9	P43378	52488.2
RANBP1	Ran-specific GTPase-activating protein	P43487	238092
NAMPT	Nicotinamide phosphoribosyltransferase	P43490	103663
PSMC4	26S proteasome regulatory subunit 6B	P43686	425991
VDAC2	Voltage-dependent anion-selective channel protein 2	P45880	2.52739e+06
ACADSB	Short/branched chain specific acyl-CoA dehydrogenase, mitochondrial	P45954	106044
USP5	Ubiquitin carboxyl-terminal hydrolase 5	P45974	52286.6
PHKA1	Phosphorylase b kinase regulatory subunit alpha, skeletal muscle isoform	P46020	16101.3
RANGAP1	Ran GTPase-activating protein 1	P46060	420460
RECQL	ATP-dependent DNA helicase Q1	P46063	35933.4
NOP2	Probable 28S rRNA (cytosine(4447)-C(5))-methyltransferase	P46087	32674.3
CRKL	Crk-like protein	P46109	119676
MTIF2	Translation initiation factor IF-2, mitochondrial	P46199	26245.8
BAG6	Large proline-rich protein BAG6	P46379	518895
NSF	Vesicle-fusing ATPase	P46459	241258
NOTCH1	Neurogenic locus notch homolog protein 1	P46531	14570.6
MAP2K3	Dual specificity mitogen-activated protein kinase kinase 3	P46734	146362
BRCC3	Lys-63-specific deubiquitinase BRCC36	P46736	28130.9
RPL27A	60S ribosomal protein L27a	P46776	801383
RPL5	60S ribosomal protein L5	P46777	179701
RPL21	60S ribosomal protein L21	P46778	281385
RPL28	60S ribosomal protein L28	P46779	690562
RPS9	40S ribosomal protein S9	P46781	609170
RPS5	40S ribosomal protein S5	P46782	8716365
RPS10	40S ribosomal protein S10	P46783	625472
YAP1	Transcriptional coactivator YAP1	P46937	145868
IQGAP1	Ras GTPase-activating-like protein IQGAP1	P46940	257563
GYG1	Glycogenin-1	P46976	322411
STT3A	Dolichyl-diphosphooligosaccharide--protein glycosyltransferase subunit STT3A	P46977	2.40875e+06
CAPZA2	F-actin-capping protein subunit alpha-2	P47755	23679.6
CAPZB	F-actin-capping protein subunit beta	P47756	132314
QARS	Glutamine--tRNA ligase	P47897	435118
RPL29	60S ribosomal protein L29	P47914	457632
ID4	DNA-binding protein inhibitor ID-4	P47928	74522.2
NPTX2	Neuronal pentraxin-2	P47972	38191.5
UQCRFS1	Cytochrome b-c1 complex subunit Rieske, mitochondrial	P47985	92106.9
ATP5PO	ATP synthase subunit O, mitochondrial	P48047	590537
LIMS1	LIM and senescent cell antigen-like-containing domain protein 1	P48059	19886.4
SLC6A9	Sodium- and chloride-dependent glycine transporter 1	P48067	17015.3
LEPR	Leptin receptor	P48357	49374.6
ARCN1	Coatomer subunit delta	P48444	365344
GCLM	Glutamate--cysteine ligase regulatory subunit	P48507	169040
CD151	CD151 antigen	P48509	41120.4
PSMD8	26S proteasome non-ATPase regulatory subunit 8	P48556	413914
PRRC2A	Protein PRRC2A	P48634	63554.9
CCT5	T-complex protein 1 subunit epsilon	P48643	1.45484e+06
PTDSS1	Phosphatidylserine synthase 1	P48651	105785
HSPA13	Heat shock 70 kDa protein 13	P48723	188135
CSNK1A1	Casein kinase I isoform alpha	P48729	51097.2
IDH2	Isocitrate dehydrogenase [NADP], mitochondrial	P48735	103145
PITPNB	Phosphatidylinositol transfer protein beta isoform	P48739	58713.6
CD97	CD97 antigen	P48960	171094
POLD2	DNA polymerase delta subunit 2	P49005	11429
MARCKSL1	MARCKS-related protein	P49006	52006.6
CAMLG	Calcium signal-modulating cyclophilin ligand	P49069	66894.6
ALDH9A1	4-trimethylaminobutyraldehyde dehydrogenase	P49189	14912.2
RPL34	60S ribosomal protein L34	P49207	261871
LMAN1	Protein ERGIC-53	P49257	68001.2
SLC11A2	Natural resistance-associated macrophage protein 2	P49281	65346.1
NASP	Nuclear autoantigenic sperm protein	P49321	25432
FASN	Fatty acid synthase	P49327	383112
FNTA	Protein farnesyltransferase/geranylgeranyltransferase type-1 subunit alpha	P49354	7122.65
CCT3	T-complex protein 1 subunit gamma	P49368	4828878
TUFM	Elongation factor Tu, mitochondrial	P49411	2637712
ALDH7A1	Alpha-aminoadipic semialdehyde dehydrogenase	P49419	76540.2
CDC34	Ubiquitin-conjugating enzyme E2 R1	P49427	13194
SRP9	Signal recognition particle 9 kDa protein	P49458	222147
PCYT1A	Choline-phosphate cytidylyltransferase A	P49585	4240.83
AARS	Alanine--tRNA ligase, cytoplasmic	P49588	269855
CARS	Cysteine--tRNA ligase, cytoplasmic	P49589	22784.3
SARS	Serine--tRNA ligase, cytoplasmic	P49591	185341
PPM1F	Protein phosphatase 1F	P49593	392586
MAN2A2	Alpha-mannosidase 2x	P49641	53153.5
PRIM1	DNA primase small subunit	P49642	43640.4
PRIM2	DNA primase large subunit	P49643	34796.2
CSNK1E	Casein kinase I isoform epsilon	P49674	58041.8
PSMB3	Proteasome subunit beta type-3	P49720	208425
PSMB2	Proteasome subunit beta type-2	P49721	378936
MCM2	DNA replication licensing factor MCM2	P49736	53390.2
COMP	Cartilage oligomeric matrix protein	P49747	34959.8
TMED10	Transmembrane emp24 domain-containing protein 10	P49755	1.31189e+06
RBM25	RNA-binding protein 25	P49756	109850
NUMB	Protein numb homolog	P49757	26089.1
EIF2B2	Translation initiation factor eIF-2B subunit beta	P49770	29166.5
HINT1	Histidine triad nucleotide-binding protein 1	P49773	58549
NUP153	Nuclear pore complex protein Nup153	P49790	202490
RANBP2	E3 SUMO-protein ligase RanBP2	P49792	156689
PSEN2	Presenilin-2	P49810	45551.3
TSC2	Tuberin	P49815	76122.3
NDUFV1	NADH dehydrogenase [ubiquinone] flavoprotein 1, mitochondrial	P49821	143057
GSK3B	Glycogen synthase kinase-3 beta	P49841	57834.4
GMPS	GMP synthase [glutamine-hydrolyzing]	P49915	209232
LIG3	DNA ligase 3	P49916	73228.6
MRE11	Double-strand break repair protein MRE11	P49959	80237.6
IDH3A	Isocitrate dehydrogenase [NAD] subunit alpha, mitochondrial	P50213	88543.6
GDI2	Rab GDP dissociation inhibitor beta	P50395	65814.8
EMD	Emerin	P50402	800872
CPT1A	Carnitine O-palmitoyltransferase 1, liver isoform	P50416	888236
SLC26A2	Sulfate transporter	P50443	31064.6
SERPINH1	Serpin H1	P50454	7284895
ST13	Hsc70-interacting protein	P50502	81556.8
VASP	Vasodilator-stimulated phosphoprotein	P50552	21441.4
DNM2	Dynamin-2	P50570	610011
KNTC1	Kinetochore-associated protein 1	P50748	119299
CDK9	Cyclin-dependent kinase 9	P50750	18656.3
LRBA	Lipopolysaccharide-responsive and beige-like anchor protein	P50851	58657.9
BCAM	Basal cell adhesion molecule	P50895	10297.6
PPT1	Palmitoyl-protein thioesterase 1	P50897	852310
RPL14	60S ribosomal protein L14	P50914	535155
CCT8	T-complex protein 1 subunit theta	P50990	2876623
CCT4	T-complex protein 1 subunit delta	P50991	2659285
FXR1	Fragile X mental retardation syndrome-related protein 1	P51114	85889.9
FXR2	Fragile X mental retardation syndrome-related protein 2	P51116	12561.2
RAB5C	Ras-related protein Rab-5C	P51148	95609.9
RAB7A	Ras-related protein Rab-7a	P51149	13873.9
RAB9A;RAB9B	Ras-related protein Rab-9A;Ras-related protein Rab-9B	P51151;Q9NP90	24424.2
RAB13	Ras-related protein Rab-13	P51153	222632
DUSP3	Dual specificity protein phosphatase 3	P51452	71948.1
DNA2	DNA replication ATP-dependent helicase/nuclease DNA2	P51530	85994.8
SMARCA4	Transcription activator BRG1	P51532	34272.2
IDH3G	Isocitrate dehydrogenase [NAD] subunit gamma, mitochondrial	P51553	57359
GALK1	Galactokinase	P51570	241589
SSR4	Translocon-associated protein subunit delta	P51571	1.59679e+06
BCAP31	B-cell receptor-associated protein 31	P51572	110358
HCFC1	Host cell factor 1	P51610	189043
IRAK1	Interleukin-1 receptor-associated kinase 1	P51617	135598
ALDH3A2	Fatty aldehyde dehydrogenase	P51648	159279
GPC3	Glypican-3	P51654	40013.5
HSD17B4	Peroxisomal multifunctional enzyme type 2	P51659	64824.5
PSMD7	26S proteasome non-ATPase regulatory subunit 7	P51665	238891
UBE2D1	Ubiquitin-conjugating enzyme E2 D1	P51668	16092
SGSH	N-sulphoglucosamine sulphohydrolase	P51688	431171
ARSD	Arylsulfatase D	P51689	63355.6
USP11	Ubiquitin carboxyl-terminal hydrolase 11	P51784	60808.2
CLCN3	H(+)/Cl(-) exchange transporter 3	P51790	86125.9
CLCN7	H(+)/Cl(-) exchange transporter 7	P51798	165810
PLXNA3	Plexin-A3	P51805	59147
DYNLT3	Dynein light chain Tctex-type 3	P51808	13798.9
VAMP7	Vesicle-associated membrane protein 7	P51809	45523.7
RPS6KA3	Ribosomal protein S6 kinase alpha-3	P51812	15379.1
HDGF	Hepatoma-derived growth factor	P51858	14522
NEK4	Serine/threonine-protein kinase Nek4	P51957	11660.4
NDUFA8	NADH dehydrogenase [ubiquinone] 1 alpha subcomplex subunit 8	P51970	243044
HNRNPA3	Heterogeneous nuclear ribonucleoprotein A3	P51991	232536
HNRNPM	Heterogeneous nuclear ribonucleoprotein M	P52272	490786
KPNA2	Importin subunit alpha-1	P52292	387676
KPNA1	Importin subunit alpha-5	P52294	37432.1
NCBP2	Nuclear cap-binding protein subunit 2	P52298	36779.1
RAP1GDS1	Rap1 GTPase-GDP dissociation stimulator 1	P52306	75355.6
DGKE	Diacylglycerol kinase epsilon	P52429	125385
POLR2H	DNA-directed RNA polymerases I, II, and III subunit RPABC3	P52434	65998
ARHGDIA	Rho GDP-dissociation inhibitor 1	P52565	27466
HNRNPF	Heterogeneous nuclear ribonucleoprotein F	P52597	147066
STAT2	Signal transducer and activator of transcription 2	P52630	25107.8
MSH6	DNA mismatch repair protein Msh6	P52701	322256
KIF11	Kinesin-like protein KIF11	P52732	37789.7
VAV2	Guanine nucleotide exchange factor VAV2	P52735	55677.3
ZNF133;ZNF169	Zinc finger protein 133;Zinc finger protein 169	P52736;Q14929	7336.21
HK2	Hexokinase-2	P52789	11016499
CAPZA1	F-actin-capping protein subunit alpha-1	P52907	117189
NUP98	Nuclear pore complex protein Nup98-Nup96	P52948	30696.5
BLVRA	Biliverdin reductase A	P53004	111783
SLC25A1	Tricarboxylate transport protein, mitochondrial	P53007	1.97316e+06
PPP5C	Serine/threonine-protein phosphatase 5	P53041	13040.2
PLK1	Serine/threonine-protein kinase PLK1	P53350	451775
ARFIP2	Arfaptin-2	P53365	61972.9
ARFIP1	Arfaptin-1	P53367	35951.6
NUBP1	Cytosolic Fe-S cluster assembly factor NUBP1	P53384	63780
ACLY	ATP-citrate synthase	P53396	191050
METAP1	Methionine aminopeptidase 1	P53582	57003.8
SUCLG1	Succinate--CoA ligase [ADP/GDP-forming] subunit alpha, mitochondrial	P53597	78581.2
RABGGTB	Geranylgeranyl transferase type-2 subunit beta	P53611	30922.4
COPB1	Coatomer subunit beta	P53618	629326
COPA	Coatomer subunit alpha	P53621	471816
CTSC	Dipeptidyl peptidase 1	P53634	1302194
AP3M2	AP-3 complex subunit mu-2	P53677	41808.3
AP2S1	AP-2 complex subunit sigma	P53680	42994.9
SLC5A3	Sodium/myo-inositol cotransporter	P53794	77711.8
PTTG1IP	Pituitary tumor-transforming gene 1 protein-interacting protein	P53801	74105.7
SLC16A1	Monocarboxylate transporter 1	P53985	2.72786e+06
IST1	IST1 homolog	P53990	20495.3
SUB1	Activated RNA polymerase II transcriptional coactivator p15	P53999	50237.2
CLNS1A	Methylosome subunit pICln	P54105	138719
RARS	Arginine--tRNA ligase, cytoplasmic	P54136	663605
PMS1	PMS1 protein homolog 1	P54277	30293.4
CACNA2D1	Voltage-dependent calcium channel subunit alpha-2/delta-1	P54289	86299.1
YARS	Tyrosine--tRNA ligase, cytoplasmic	P54577	174785
USP14	Ubiquitin carboxyl-terminal hydrolase 14	P54578	28640.9
HSPA2	Heat shock-related 70 kDa protein 2	P54652	2.71197e+06
ATP1B3	Sodium/potassium-transporting ATPase subunit beta-3	P54709	375876
RAD23B	UV excision repair protein RAD23 homolog B	P54727	68160.2
EPHA4	Ephrin type-A receptor 4	P54764	65542
NAGLU	Alpha-N-acetylglucosaminidase	P54802	912393
GALC	Galactocerebrosidase	P54803	119303
ALDH18A1	Delta-1-pyrroline-5-carboxylate synthase	P54886	196961
EIF5	Eukaryotic translation initiation factor 5	P55010	34999.4
SLC12A2	Solute carrier family 12 member 2	P55011	169072
PSMD4	26S proteasome non-ATPase regulatory subunit 4	P55036	540354
PLTP	Phospholipid transfer protein	P55058	89825.4
CSE1L	Exportin-2	P55060	728602
TMBIM6	Bax inhibitor 1	P55061	30417.4
VCP	Transitional endoplasmic reticulum ATPase	P55072	846962
MFAP3	Microfibril-associated glycoprotein 3	P55082	15551.2
HADHB	Trifunctional enzyme subunit beta, mitochondrial	P55084	301550
F2RL1	Proteinase-activated receptor 2	P55085	42164
NAP1L1	Nucleosome assembly protein 1-like 1	P55209	492875
CASP6	Caspase-6	P55212	22912.7
ADAR	Double-stranded RNA-specific adenosine deaminase	P55265	195084
LAMB2	Laminin subunit beta-2	P55268	369659
CDH13	Cadherin-13	P55290	12608.5
SEC13	Protein SEC13 homolog	P55735	70698.5
SNU13	NHP2-like protein 1	P55769	297779
NPEPPS	Puromycin-sensitive aminopeptidase	P55786	276979
HNRNPH2	Heterogeneous nuclear ribonucleoprotein H2	P55795	134731
SUMO3;SUMO2;SUMO4	Small ubiquitin-related modifier 3;Small ubiquitin-related modifier 2;Small ubiquitin-related modifier 4	P55854;P61956;Q6EEV6	21456.4
EIF3B	Eukaryotic translation initiation factor 3 subunit B	P55884	673297
FCGRT	IgG receptor FcRn large subunit p51	P55899	16754.4
ATP5MF	ATP synthase subunit f, mitochondrial	P56134	1.34191e+06
NDUFV3	NADH dehydrogenase [ubiquinone] flavoprotein 3, mitochondrial	P56181	63419.6
RRP1	Ribosomal RNA processing protein 1 homolog A	P56182	12203
MARS	Methionine--tRNA ligase, cytoplasmic	P56192	603885
ITGA1	Integrin alpha-1	P56199	338135
MAZ	Myc-associated zinc finger protein	P56270	119091
AP1S2	AP-1 complex subunit sigma-2	P56377	85530.1
MP68	6.8 kDa mitochondrial proteolipid	P56378	110333
ATP5F1E;ATP5EP2	ATP synthase subunit epsilon, mitochondrial;ATP synthase subunit epsilon-like protein, mitochondrial	P56381;Q5VTU8	59342.9
ATP5ME	ATP synthase subunit e, mitochondrial	P56385	123200
CTBP2	C-terminal-binding protein 2	P56545	245964
NDUFA6	NADH dehydrogenase [ubiquinone] 1 alpha subcomplex subunit 6	P56556	29328.1
TMEM50B	Transmembrane protein 50B	P56557	29095.4
PEX3	Peroxisomal biogenesis factor 3	P56589	58706.2
PRSS12	Neurotrypsin	P56730	40025.7
BACE1	Beta-secretase 1	P56817	51299.7
HSD17B7	3-keto-steroid reductase	P56937	73149.4
STX17	Syntaxin-17	P56962	150663
TMEM33	Transmembrane protein 33	P57088	1.512e+06
SYNJ2BP	Synaptojanin-2-binding protein	P57105	14863.6
GEMIN4	Gem-associated protein 4	P57678	117179
CORO7	Coronin-7	P57737	30664.6
NUP107	Nuclear pore complex protein Nup107	P57740	402069
EEFSEC	Selenocysteine-specific elongation factor	P57772	59150.3
SESN2	Sestrin-2	P58004	11260.2
YBEY	Endoribonuclease YbeY	P58557	123748
ARPC4	Actin-related protein 2/3 complex subunit 4	P59998	34095
SEC61G	Protein transport protein Sec61 subunit gamma	P60059	1.03098e+06
TPI1	Triosephosphate isomerase	P60174	52486.4
EIF3E	Eukaryotic translation initiation factor 3 subunit E	P60228	163681
SEC61B	Protein transport protein Sec61 subunit beta	P60468	1.07153e+06
PPP4C	Serine/threonine-protein phosphatase 4 catalytic subunit	P60510	27915.7
ROMO1	Reactive oxygen species modulator 1	P60602	54991.4
UBE2G2	Ubiquitin-conjugating enzyme E2 G2	P60604	97774.3
MYL6	Myosin light polypeptide 6	P60660	125860
ACTB	Actin, cytoplasmic 1	P60709	378955
EIF4A1	Eukaryotic initiation factor 4A-I	P60842	2.0438e+06
RPS20	40S ribosomal protein S20	P60866	4.08682e+06
PRPS1	Ribose-phosphate pyrophosphokinase 1	P60891	1.40485e+06
PSMA6	Proteasome subunit alpha type-6	P60900	927522
S100A10	Protein S100-A10	P60903	64048.1
CDC42	Cell division control protein 42 homolog	P60953	10278.1
DSTN	Destrin	P60981	1.37951e+06
RAB8A	Ras-related protein Rab-8A	P61006	6926.11
SPCS3	Signal peptidase complex subunit 3	P61009	282048
SRP54	Signal recognition particle 54 kDa protein	P61011	59457.2
RAB2A;RAB2B	Ras-related protein Rab-2A;Ras-related protein Rab-2B	P61019;Q8WUD1	33387.5
RAB10	Ras-related protein Rab-10	P61026	91133
CXCR4	C-X-C chemokine receptor type 4	P61073	20112
UBE2D3;UBE2D2	Ubiquitin-conjugating enzyme E2 D3;Ubiquitin-conjugating enzyme E2 D2	P61077;P62837	52894.1
UBE2M	NEDD8-conjugating enzyme Ubc12	P61081	54419.6
UBE2N;UBE2NL	Ubiquitin-conjugating enzyme E2 N;Putative ubiquitin-conjugating enzyme E2 N-like	P61088;Q5JXB2	10436.8
RAB14	Ras-related protein Rab-14	P61106	43022.2
ACTR3	Actin-related protein 3	P61158	28102.1
ACTR2	Actin-related protein 2	P61160	315311
ACTR1A	Alpha-centractin	P61163	116254
TMEM258	Transmembrane protein 258	P61165	1.11819e+06
COPS2	COP9 signalosome complex subunit 2	P61201	21917.1
ARF3;ARF1	ADP-ribosylation factor 3;ADP-ribosylation factor 1	P61204;P84077	261426
ABCE1	ATP-binding cassette sub-family E member 1	P61221	1748721
RAP1B	Ras-related protein Rap-1b	P61224	82531
RPS3A	40S ribosomal protein S3a	P61247	628407
RPL26	60S ribosomal protein L26	P61254	757173
PSME3	Proteasome activator complex subunit 3	P61289	74923.4
RPL15	60S ribosomal protein L15	P61313	392863
MAGOH	Protein mago nashi homolog	P61326	29142
RPL27	60S ribosomal protein L27	P61353	483921
ATP6V0D1	V-type proton ATPase subunit d 1	P61421	31052.1
RPL37A	60S ribosomal protein L37a	P61513	80674.6
RHOA	Transforming protein RhoA	P61586	102711
HSPE1	10 kDa heat shock protein, mitochondrial	P61604	36355.2
SEC61A1	Protein transport protein Sec61 subunit alpha isoform 1	P61619	1.56175e+06
LYZ	Lysozyme C	P61626	27155.7
VBP1	Prefoldin subunit 3	P61758	57396.5
B2M	Beta-2-microglobulin	P61769	5829.12
DAD1	Dolichyl-diphosphooligosaccharide--protein glycosyltransferase subunit DAD1	P61803	958610
COPZ1	Coatomer subunit zeta-1	P61923	147227
DCAF7	DDB1- and CUL4-associated factor 7	P61962	50521.7
WDR5	WD repeat-containing protein 5	P61964	61754.2
AP1S1	AP-1 complex subunit sigma-1A	P61966	140394
HNRNPK	Heterogeneous nuclear ribonucleoprotein K	P61978	987820
YWHAG	14-3-3 protein gamma	P61981	246688
RRAS2	Ras-related protein R-Ras2	P62070	29424.5
RPS7	40S ribosomal protein S7	P62081	338024
PPP1CA	Serine/threonine-protein phosphatase PP1-alpha catalytic subunit	P62136	81525.4
PPP1CB	Serine/threonine-protein phosphatase PP1-beta catalytic subunit	P62140	59370.5
PSMC1	26S proteasome regulatory subunit 4	P62191	342251
PSMC5	26S proteasome regulatory subunit 8	P62195	551271
RPS8	40S ribosomal protein S8	P62241	317466
RPS15A	40S ribosomal protein S15a	P62244	1.00497e+06
RPS16	40S ribosomal protein S16	P62249	2.472e+06
YWHAE	14-3-3 protein epsilon	P62258	1105235
RPS14	40S ribosomal protein S14	P62263	4.50189e+06
RPS23	40S ribosomal protein S23	P62266	449672
RPS18	40S ribosomal protein S18	P62269	3.45392e+06
RPS29	40S ribosomal protein S29	P62273	103985
RPS13	40S ribosomal protein S13	P62277	577009
RPS11	40S ribosomal protein S11	P62280	1.77012e+06
SNRPE	Small nuclear ribonucleoprotein E	P62304	434091
SNRPF	Small nuclear ribonucleoprotein F	P62306	184689
LSM3	U6 snRNA-associated Sm-like protein LSm3	P62310	33739.7
SNRPD1	Small nuclear ribonucleoprotein Sm D1	P62314	116599
SNRPD2	Small nuclear ribonucleoprotein Sm D2	P62316	154198
SNRPD3	Small nuclear ribonucleoprotein Sm D3	P62318	2035039
ARF6	ADP-ribosylation factor 6	P62330	38586.6
PSMC6	26S proteasome regulatory subunit 10B	P62333	548725
SELENOT	Thioredoxin reductase-like selenoprotein T	P62341	27921.8
RPL7A	60S ribosomal protein L7a	P62424	334195
RAB11A;RAB11B	Ras-related protein Rab-11A;Ras-related protein Rab-11B	P62491;Q15907	32045.8
CNBP	Cellular nucleic acid-binding protein	P62633	54333.2
RPS4X	40S ribosomal protein S4, X isoform	P62701	1.02878e+06
PPP2CB	Serine/threonine-protein phosphatase 2A catalytic subunit beta isoform	P62714	542024
RHOB	Rho-related GTP-binding protein RhoB	P62745	26456.3
RPL23A	60S ribosomal protein L23a	P62750	200247
RPS6	40S ribosomal protein S6	P62753	655523
HIST1H4A	Histone H4	P62805	1.24211e+06
RAB1A;RAB1B	Ras-related protein Rab-1A;Ras-related protein Rab-1B	P62820;Q9H0U4	349122
RAN	GTP-binding nuclear protein Ran	P62826	744553
RPL23	60S ribosomal protein L23	P62829	4063319
RAP1A	Ras-related protein Rap-1A	P62834	116612
RPS15	40S ribosomal protein S15	P62841	67017
RPS24	40S ribosomal protein S24	P62847	125083
RPS25	40S ribosomal protein S25	P62851	1.33295e+06
RPS26	40S ribosomal protein S26	P62854	384091
RPS28	40S ribosomal protein S28	P62857	396658
FAU	40S ribosomal protein S30	P62861	775445
GNB1	Guanine nucleotide-binding protein G(I)/G(S)/G(T) subunit beta-1	P62873	29449.8
RBX1	E3 ubiquitin-protein ligase RBX1	P62877	169019
GNB2	Guanine nucleotide-binding protein G(I)/G(S)/G(T) subunit beta-2	P62879	194239
RPL30	60S ribosomal protein L30	P62888	369745
RPL39;RPL39P5	60S ribosomal protein L39;Putative 60S ribosomal protein L39-like 5	P62891;Q59GN2	58055.6
RPL31	60S ribosomal protein L31	P62899	321926
RPL10A	60S ribosomal protein L10a	P62906	628536
RPL32	60S ribosomal protein L32	P62910	306663
RPL11	60S ribosomal protein L11	P62913	1.30721e+06
RPL8	60S ribosomal protein L8	P62917	459328
PPIA	Peptidyl-prolyl cis-trans isomerase A	P62937	205400
RPS27A	Ubiquitin-40S ribosomal protein S27a	P62979	18759246
GRB2	Growth factor receptor-bound protein 2	P62993	499580
RAC1	Ras-related C3 botulinum toxin substrate 1	P63000	139480
GNAS	Guanine nucleotide-binding protein G(s) subunit alpha isoforms short;Guanine nucleotide-binding protein G(s) subunit alpha isoforms XLas	P63092;Q5JWF2	321911
GNAI1	Guanine nucleotide-binding protein G(i) subunit alpha-1	P63096	20599.5
YWHAZ	14-3-3 protein zeta/delta	P63104	1.27744e+06
PPP2R2A	Serine/threonine-protein phosphatase 2A 55 kDa regulatory subunit B alpha isoform	P63151	143790
DYNLL1	Dynein light chain 1, cytoplasmic	P63167	596256
DYNLT1	Dynein light chain Tctex-type 1	P63172	18552.1
RPL38	60S ribosomal protein L38	P63173	2.61733e+06
SKP1	S-phase kinase-associated protein 1	P63208	19951484
GNG5	Guanine nucleotide-binding protein G(I)/G(S)/G(O) subunit gamma-5	P63218	49989
RPS21	40S ribosomal protein S21	P63220	266361
EIF5A	Eukaryotic translation initiation factor 5A-1	P63241	226118
RACK1	Receptor of activated protein C kinase 1	P63244	1942976
ACTG1	Actin, cytoplasmic 2	P63261	1.69576e+06
UBE2I	SUMO-conjugating enzyme UBC9	P63279	121523
PPP2CA	Serine/threonine-protein phosphatase 2A catalytic subunit alpha isoform	P67775	41722.5
YBX1	Nuclease-sensitive element-binding protein 1	P67809	224660
SEC11A	Signal peptidase complex catalytic subunit SEC11A	P67812	589315
CSNK2B	Casein kinase II subunit beta	P67870	76412.7
ACTC1;ACTA1	Actin, alpha cardiac muscle 1;Actin, alpha skeletal muscle	P68032;P68133	113638
EEF1A1	Elongation factor 1-alpha 1	P68104	32204348
TUBA1B	Tubulin alpha-1B chain	P68363	19686166
TUBA4A	Tubulin alpha-4A chain	P68366	112777
TUBB4B	Tubulin beta-4B chain	P68371	11325174
CSNK2A1	Casein kinase II subunit alpha	P68400	71223.5
HIST1H3A;H3F3A;HIST3H3;HIST2H3A	Histone H3.1;Histone H3.3;Histone H3.1t;Histone H3.2	P68431;P84243;Q16695;Q71DI3	666167
HBA1	Hemoglobin subunit alpha	P69905	91096.4
NOP14	Nucleolar protein 14	P78316	15534.7
IGBP1	Immunoglobulin-binding protein 1	P78318	95511.6
SIRPA	Tyrosine-protein phosphatase non-receptor type substrate 1	P78324	9814.29
EIF4G2	Eukaryotic translation initiation factor 4 gamma 2	P78344	105192
RPP38	Ribonuclease P protein subunit p38	P78345	12975.2
RPP30	Ribonuclease P protein subunit p30	P78346	514934
GTF2I	General transcription factor II-I	P78347	415265
ASIC1	Acid-sensing ion channel 1	P78348	16289.4
CNTNAP1	Contactin-associated protein 1	P78357	339136
CCT2	T-complex protein 1 subunit beta	P78371	2.65942e+06
SLC35A2	UDP-galactose translocator	P78381	22444.4
RAE1	mRNA export factor	P78406	58757.3
JAG1	Protein jagged-1	P78504	123225
RELN	Reelin	P78509	7871.2
PRKDC	DNA-dependent protein kinase catalytic subunit	P78527	2.47963e+06
ADAM17	Disintegrin and metalloproteinase domain-containing protein 17	P78536	509191
FAM189B	Protein FAM189B	P81408	9464.44
DCD	Dermcidin	P81605	111281
MRPS25	28S ribosomal protein S25, mitochondrial	P82663	22574.8
MRPS15	28S ribosomal protein S15, mitochondrial	P82914	39874.9
MRPS21	28S ribosomal protein S21, mitochondrial	P82921	42862.6
MRPS34	28S ribosomal protein S34, mitochondrial	P82930	84878.7
MRPS6	28S ribosomal protein S6, mitochondrial	P82932	38401.4
COG7	Conserved oligomeric Golgi complex subunit 7	P83436	11113.8
RPL24	60S ribosomal protein L24	P83731	449939
RPL36A	60S ribosomal protein L36a	P83881	161673
SMAD3	Mothers against decapentaplegic homolog 3	P84022	91036
ARF5	ADP-ribosylation factor 5	P84085	436332
RPL19	60S ribosomal protein L19	P84098	315006
SRSF3	Serine/arginine-rich splicing factor 3	P84103	236726
FOXK1	Forkhead box protein K1	P85037	16519.1
ARHGAP8	Rho GTPase-activating protein 8	P85298	38032.6
CCZ1B;CCZ1	Vacuolar fusion protein CCZ1 homolog B;Vacuolar fusion protein CCZ1 homolog	P86790;P86791	32117.3
DGCR2	Integral membrane protein DGCR2/IDD	P98153	50755.1
HSPG2	Basement membrane-specific heparan sulfate proteoglycan core protein	P98160	42489.6
LRP2	Low-density lipoprotein receptor-related protein 2	P98164	76254.5
XIAP	E3 ubiquitin-protein ligase XIAP	P98170	56591.8
FAM3A	Protein FAM3A	P98173	70511.7
FGD1	FYVE, RhoGEF and PH domain-containing protein 1	P98174	29533.5
ATP2C1	Calcium-transporting ATPase type 2C member 1	P98194	103978
CYCS	Cytochrome c	P99999	80962.7
MPP1	55 kDa erythrocyte membrane protein	Q00013	125545
TFAM	Transcription factor A, mitochondrial	Q00059	83880.8
SLC25A3	Phosphate carrier protein, mitochondrial	Q00325	8404092
HDLBP	Vigilin	Q00341	358804
GTF2B	Transcription initiation factor IIB	Q00403	201425
CDK5	Cyclin-dependent-like kinase 5	Q00535	99836.6
CDK16;CDK17;CDK18	Cyclin-dependent kinase 16;Cyclin-dependent kinase 17;Cyclin-dependent kinase 18	Q00536;Q00537;Q07002	23596.1
CDC42EP1	Cdc42 effector protein 1	Q00587	103111
CLTC	Clathrin heavy chain 1	Q00610	184146
REEP5	Receptor expression-enhancing protein 5	Q00765	81232.5
SORD	Sorbitol dehydrogenase	Q00796	58613
HNRNPU	Heterogeneous nuclear ribonucleoprotein U	Q00839	482536
SPTBN1	Spectrin beta chain, non-erythrocytic 1	Q01082	8174.29
TIAL1	Nucleolysin TIAR	Q01085	33058.7
CTBS	Di-N-acetylchitobiase	Q01459	439530
CAP1	Adenylyl cyclase-associated protein 1	Q01518	149626
SLC7A5	Large neutral amino acids transporter small subunit 1	Q01650	235839
EXOSC10	Exosome component 10	Q01780	18832.9
OTUD4	OTU domain-containing protein 4	Q01804	10232.8
PFKP	ATP-dependent 6-phosphofructokinase, platelet type	Q01813	333069
ATP2B2	Plasma membrane calcium-transporting ATPase 2	Q01814	28250.6
EWSR1	RNA-binding protein EWS	Q01844	196934
OCRL	Inositol polyphosphate 5-phosphatase OCRL-1	Q01968	49128.2
ROR1	Inactive tyrosine-protein kinase transmembrane receptor ROR1	Q01973	7352.74
ROR2	Tyrosine-protein kinase transmembrane receptor ROR2	Q01974	26842.6
NAAA	N-acylethanolamine-hydrolyzing acid amidase	Q02083	204991
BDH1	D-beta-hydroxybutyrate dehydrogenase, mitochondrial	Q02338	30170.4
DSC2	Desmocollin-2	Q02487	13076.2
RPL18A	60S ribosomal protein L18a	Q02543	284373
FKBP4	Peptidyl-prolyl cis-trans isomerase FKBP4	Q02790	42935.3
PLOD1	Procollagen-lysine,2-oxoglutarate 5-dioxygenase 1	Q02809	740485
RPL6	60S ribosomal protein L6	Q02878	511425
AKAP12	A-kinase anchor protein 12	Q02952	8675.53
SLC25A11	Mitochondrial 2-oxoglutarate/malate carrier protein	Q02978	4.07169e+06
TGFBR3	Transforming growth factor beta receptor type 3	Q03167	20297.7
LMNB2	Lamin-B2	Q03252	49092.1
MVK	Mevalonate kinase	Q03426	11760
CEBPZ	CCAAT/enhancer-binding protein zeta	Q03701	39919.8
ZNF90	Zinc finger protein 90	Q03938	1624.58
UBXN1	UBX domain-containing protein 1	Q04323	279292
EIF4G1	Eukaryotic translation initiation factor 4 gamma 1	Q04637	586014
KRT17	Keratin, type I cytoskeletal 17	Q04695	80147.3
NOTCH2	Neurogenic locus notch homolog protein 2	Q04721	190144
TLE3	Transducin-like enhancer protein 3	Q04726	19227.2
PRKCQ	Protein kinase C theta type	Q04759	137094
GLO1	Lactoylglutathione lyase	Q04760	269676
SSBP1	Single-stranded DNA-binding protein, mitochondrial	Q04837	167836
CD164	Sialomucin core protein 24	Q04900	20985
YWHAH	14-3-3 protein eta	Q04917	221997
CSTF1	Cleavage stimulation factor subunit 1	Q05048	59138.9
UBE3A	Ubiquitin-protein ligase E3A	Q05086	79901.5
PTPN12	Tyrosine-protein phosphatase non-receptor type 12	Q05209	29714.7
EEF1A2	Elongation factor 1-alpha 2	Q05639	25315.5
COL14A1	Collagen alpha-1(XIV) chain	Q05707	987257
RNASEL	2-5A-dependent ribonuclease	Q05823	39995.4
FPGS	Folylpolyglutamate synthase, mitochondrial	Q05932	14524
ITIH3	Inter-alpha-trypsin inhibitor heavy chain H3	Q06033	211679
PTPN11	Tyrosine-protein phosphatase non-receptor type 11	Q06124	31161.7
KDSR	3-ketodihydrosphingosine reductase	Q06136	51776
PPAT	Amidophosphoribosyltransferase	Q06203	111015
GFPT1	Glutamine--fructose-6-phosphate aminotransferase [isomerizing] 1	Q06210	169553
EXOSC9	Exosome complex component RRP45	Q06265	39387.7
PSME1	Proteasome activator complex subunit 1	Q06323	352340
APLP2	Amyloid-like protein 2	Q06481	44002.5
GABPA	GA-binding protein alpha chain	Q06546	55532.3
RING1;RNF2	E3 ubiquitin-protein ligase RING1;E3 ubiquitin-protein ligase RING2	Q06587;Q99496	105527
PRDX1	Peroxiredoxin-1	Q06830	1.7656e+06
RPL18	60S ribosomal protein L18	Q07020	904201
C1QBP	Complement component 1 Q subcomponent-binding protein, mitochondrial	Q07021	1.46651e+06
CKAP4	Cytoskeleton-associated protein 4	Q07065	564877
KHDRBS1	KH domain-containing, RNA-binding, signal transduction-associated protein 1	Q07666	144638
BAX	Apoptosis regulator BAX	Q07812	100383
MCL1	Induced myeloid leukemia cell differentiation protein Mcl-1	Q07820	116463
POLE	DNA polymerase epsilon catalytic subunit A	Q07864	272952
KLC1	Kinesin light chain 1	Q07866	27285.9
LRP1	Prolow-density lipoprotein receptor-related protein 1	Q07954	712778
SRSF1	Serine/arginine-rich splicing factor 1	Q07955	56774.6
PPP3CA	Serine/threonine-protein phosphatase 2B catalytic subunit alpha isoform	Q08209	325066
DHX9	ATP-dependent RNA helicase A	Q08211	277860
GOLGA2	Golgin subfamily A member 2	Q08379	20869.1
LGALS3BP	Galectin-3-binding protein	Q08380	930514
MFGE8	Lactadherin	Q08431	38932.8
CD47	Leukocyte surface antigen CD47	Q08722	183287
PPID	Peptidyl-prolyl cis-trans isomerase D	Q08752	72136.8
SSRP1	FACT complex subunit SSRP1	Q08945	87063.6
VAC14	Protein VAC14 homolog	Q08AM6	22459.9
NSUN2	tRNA (cytosine(34)-C(5))-methyltransferase	Q08J23	223480
DMWD	Dystrophia myotonica WD repeat-containing protein	Q09019	25152.2
RBBP4	Histone-binding protein RBBP4	Q09028	682975
NCBP1	Nuclear cap-binding protein subunit 1	Q09161	156940
MGAT5	Alpha-1,6-mannosylglycoprotein 6-beta-N-acetylglucosaminyltransferase A	Q09328	38155.3
TMEM62	Transmembrane protein 62	Q0P6H9	27441.5
ELP6	Elongator complex protein 6	Q0PNE2	16626.6
HSPA14	Heat shock 70 kDa protein 14	Q0VDF9	56844.2
MGAT2	Alpha-1,6-mannosyl-glycoprotein 2-beta-N-acetylglucosaminyltransferase	Q10469	1749069
GALNT2	Polypeptide N-acetylgalactosaminyltransferase 2	Q10471	70032.9
GALNT1	Polypeptide N-acetylgalactosaminyltransferase 1	Q10472	104190
AP1B1	AP-1 complex subunit beta-1	Q10567	157733
CPSF1	Cleavage and polyadenylation specificity factor subunit 1	Q10570	108258
NUP160	Nuclear pore complex protein Nup160	Q12769	119524
SCAP	Sterol regulatory element-binding protein cleavage-activating protein	Q12770	347997
SREBF2	Sterol regulatory element-binding protein 2	Q12772	98917.6
TBL3	Transducin beta-like protein 3	Q12788	91415.3
GTF3C1	General transcription factor 3C polypeptide 1	Q12789	245362
ASPH	Aspartyl/asparaginyl beta-hydroxylase	Q12797	936425
TFCP2;UBP1	Alpha-globin transcription factor CP2;Upstream-binding protein 1	Q12800;Q9NZI7	44666.7
BPTF	Nucleosome-remodeling factor subunit BPTF	Q12830	30511.8
FSTL1	Follistatin-related protein 1	Q12841	26009.3
STX4	Syntaxin-4	Q12846	27343.8
CNTN1	Contactin-1	Q12860	182709
MERTK	Tyrosine-protein kinase Mer	Q12866	22946.2
SF3A3	Splicing factor 3A subunit 3	Q12874	334.001
FAP	Prolyl endopeptidase FAP	Q12884	36314.1
HYAL2	Hyaluronidase-2	Q12891	36073.9
TMEM115	Transmembrane protein 115	Q12893	211028
IFRD2	Interferon-related developmental regulator 2	Q12894	33997.4
AIMP1	Aminoacyl tRNA synthase complex-interacting multifunctional protein 1	Q12904	240532
ILF2	Interleukin enhancer-binding factor 2	Q12905	305678
ILF3	Interleukin enhancer-binding factor 3	Q12906	390325
LMAN2	Vesicular integral-membrane protein VIP36	Q12907	511503
PTPRJ	Receptor-type tyrosine-protein phosphatase eta	Q12913	121324
PTPN13	Tyrosine-protein phosphatase non-receptor type 13	Q12923	29413
TRAP1	Heat shock protein 75 kDa, mitochondrial	Q12931	2.01504e+06
FOXC1	Forkhead box protein C1	Q12948	28512.8
DLG1	Disks large homolog 1	Q12959	14567.3
PTP4A2;PTP4A1	Protein tyrosine phosphatase type IVA 2;Protein tyrosine phosphatase type IVA 1	Q12974;Q93096	15564.4
ABR	Active breakpoint cluster region-related protein	Q12979	2796.62
BNIP1	Vesicle transport protein SEC20	Q12981	46833.9
BNIP3	BCL2/adenovirus E1B 19 kDa protein-interacting protein 3	Q12983	3380.25
CSTF3	Cleavage stimulation factor subunit 3	Q12996	118318
TSPAN31	Tetraspanin-31	Q12999	80997
CDC16	Cell division cycle protein 16 homolog	Q13042	54379.4
STK4	Serine/threonine-protein kinase 4	Q13043	28065.5
FLII	Protein flightless-1 homolog	Q13045	19551.4
ACACA	Acetyl-CoA carboxylase 1	Q13085	119132
PLA2G7	Platelet-activating factor acetylhydrolase	Q13093	65072.3
GPS1	COP9 signalosome complex subunit 1	Q13098	47434.9
USP4	Ubiquitin carboxyl-terminal hydrolase 4	Q13107	61567
CHAF1B	Chromatin assembly factor 1 subunit B	Q13112	26655.4
IK	Protein Red	Q13123	79758.3
PRKAA1	5'-AMP-activated protein kinase catalytic subunit alpha-1	Q13131	10911.2
PPFIA1	Liprin-alpha-1	Q13136	30394.4
CALCOCO2	Calcium-binding and coiled-coil domain-containing protein 2	Q13137	12212.3
EIF2B5	Translation initiation factor eIF-2B subunit epsilon	Q13144	41578.7
TARDBP	TAR DNA-binding protein 43	Q13148	231864
HNRNPA0	Heterogeneous nuclear ribonucleoprotein A0	Q13151	179454
AIMP2	Aminoacyl tRNA synthase complex-interacting multifunctional protein 2	Q13155	210386
FADD	FAS-associated death domain protein	Q13158	11584.9
PRDX4	Peroxiredoxin-4	Q13162	283175
CBX3	Chromobox protein homolog 3	Q13185	96177.1
STK3	Serine/threonine-protein kinase 3	Q13188	28835.9
STX5	Syntaxin-5	Q13190	38131
PSMD2	26S proteasome non-ATPase regulatory subunit 2	Q13200	296680
DNAJC3	DnaJ homolog subfamily C member 3	Q13217	48038.4
NME3	Nucleoside diphosphate kinase 3	Q13232	242742
SRSF5	Serine/arginine-rich splicing factor 5	Q13243	19533.4
SRSF6	Serine/arginine-rich splicing factor 6	Q13247	97505.5
MAD2L1	Mitotic spindle assembly checkpoint protein MAD2A	Q13257	208249
TRIM28	Transcription intermediary factor 1-beta	Q13263	1.88166e+06
G3BP1	Ras GTPase-activating protein-binding protein 1	Q13283	122674
CLN3	Battenin	Q13286	337417
PTK7	Inactive tyrosine-protein kinase 7	Q13308	617819
PABPC4	Polyadenylate-binding protein 4	Q13310	101503
ATM	Serine-protein kinase ATM	Q13315	54980
IFIT5	Interferon-induced protein with tetratricopeptide repeats 5	Q13325	10434.6
MTA1	Metastasis-associated protein MTA1	Q13330	89966.5
PTPRS	Receptor-type tyrosine-protein phosphatase S	Q13332	114516
EIF3I	Eukaryotic translation initiation factor 3 subunit I	Q13347	220646
PPIL2	RING-type E3 ubiquitin-protein ligase PPIL2	Q13356	19175.6
PPP2R5C	Serine/threonine-protein phosphatase 2A 56 kDa regulatory subunit gamma isoform	Q13362	40484.4
CTBP1	C-terminal-binding protein 1	Q13363	182070
PDCL	Phosducin-like protein	Q13371	40483.6
TARBP1	Probable methyltransferase TARBP1	Q13395	65393.3
DYNC1I2	Cytoplasmic dynein 1 intermediate chain 2	Q13409	113177
ORC1	Origin recognition complex subunit 1	Q13415	30685.3
ILK	Integrin-linked protein kinase	Q13418	40211.9
SNTB2	Beta-2-syntrophin	Q13425	58183.4
TCOF1	Treacle protein	Q13428	87982.4
SLC39A6	Zinc transporter ZIP6	Q13433	57375.8
SF3B2	Splicing factor 3B subunit 2	Q13435	120042
OS9	Protein OS-9	Q13438	363122
ADAM9	Disintegrin and metalloproteinase domain-containing protein 9	Q13443	1.16523e+06
ADAM15	Disintegrin and metalloproteinase domain-containing protein 15	Q13444	154530
TMED1	Transmembrane emp24 domain-containing protein 1	Q13445	294710
FKBP5	Peptidyl-prolyl cis-trans isomerase FKBP5	Q13451	75169.8
TUSC3	Tumor suppressor candidate 3	Q13454	57598.4
MYO9B	Unconventional myosin-IXb	Q13459	28486.3
FZD5	Frizzled-5	Q13467	7316.4
IL18R1	Interleukin-18 receptor 1	Q13478	31076.6
SMAD4	Mothers against decapentaplegic homolog 4	Q13485	21945.1
SQSTM1	Sequestosome-1	Q13501	120706
MTX1	Metaxin-1	Q13505	78292.4
TUBB3	Tubulin beta-3 chain	Q13509	51017.4
ASAH1	Acid ceramidase	Q13510	1.58021e+06
PRPF4B	Serine/threonine-protein kinase PRP4 homolog	Q13523	33283.4
ATR	Serine/threonine-protein kinase ATR	Q13535	28167.8
RIPK1	Receptor-interacting serine/threonine-protein kinase 1	Q13546	14151.7
HDAC1	Histone deacetylase 1	Q13547	202900
CAMK2B	Calcium/calmodulin-dependent protein kinase type II subunit beta	Q13554	102218
CAMK2G	Calcium/calmodulin-dependent protein kinase type II subunit gamma	Q13555	22380.7
CAMK2D	Calcium/calmodulin-dependent protein kinase type II subunit delta	Q13557	42185.3
DCTN2	Dynactin subunit 2	Q13561	70951.4
PKD2	Polycystin-2	Q13563	664407
NAE1	NEDD8-activating enzyme E1 regulatory subunit	Q13564	36555.5
SNW1	SNW domain-containing protein 1	Q13573	188965
GPR50	Melatonin-related receptor	Q13585	16052.8
STIM1	Stromal interaction molecule 1	Q13586	159290
SNX1	Sorting nexin-1	Q13596	29382.8
MTMR1	Myotubularin-related protein 1	Q13613	22118.7
MTMR2	Myotubularin-related protein 2	Q13614	12331.2
CUL1	Cullin-1	Q13616	75043.1
CUL2	Cullin-2	Q13617	57670.5
CUL3	Cullin-3	Q13618	18028.6
CUL4A	Cullin-4A	Q13619	10995.4
CUL4B	Cullin-4B	Q13620	99133.2
TP53BP2	Apoptosis-stimulating of p53 protein 2	Q13625	121010
RAB32	Ras-related protein Rab-32	Q13637	54361.3
TPBG	Trophoblast glycoprotein	Q13641	41103.4
FHL1	Four and a half LIM domains protein 1	Q13642	60559.8
FHL3	Four and a half LIM domains protein 3	Q13643	12082.1
AAMP	Angio-associated migratory cell protein	Q13685	316514
MOGS	Mannosyl-oligosaccharide glucosidase	Q13724	253281
ALCAM	CD166 antigen	Q13740	77117.2
LAMC2	Laminin subunit gamma-2	Q13753	89755
NCOA4	Nuclear receptor coactivator 4	Q13772	2913.85
PMAIP1	Phorbol-12-myristate-13-acetate-induced protein 1	Q13794	47602.3
DDX39B	Spliceosome RNA helicase DDX39B	Q13838	62139
BLMH	Bleomycin hydrolase	Q13867	12811.6
EXOSC2	Exosome complex component RRP4	Q13868	57424.9
TUBB2A	Tubulin beta-2A chain	Q13885	10440350
GTF2H2;GTF2H2C	General transcription factor IIH subunit 2;General transcription factor IIH subunit 2-like protein	Q13888;Q6P1K8	102057
GTF2H3	General transcription factor IIH subunit 3	Q13889	16457.3
BYSL	Bystin	Q13895	82095.9
CUX1	Protein CASP	Q13948	21750.5
CKAP5	Cytoskeleton-associated protein 5	Q14008	566339
HNRNPD	Heterogeneous nuclear ribonucleoprotein D0	Q14103	177570
SCARB2	Lysosome membrane protein 2	Q14108	91079.2
DAG1	Dystroglycan	Q14118	39390.6
DSG2	Desmoglein-2	Q14126	38135.5
BOP1	Ribosome biogenesis protein BOP1	Q14137	25226.3
UBE4A	Ubiquitin conjugation factor E4 A	Q14139	46433.6
2024-09-06	Septin-6	Q14141	34261.4
URB2	Unhealthy ribosome biogenesis protein 2 homolog	Q14146	166719
DHX34	Probable ATP-dependent RNA helicase DHX34	Q14147	24448.9
MORC3	MORC family CW-type zinc finger protein 3	Q14149	45668
EIF3A	Eukaryotic translation initiation factor 3 subunit A	Q14152	115598
UBAP2L	Ubiquitin-associated protein 2-like	Q14157	38260.4
SCRIB	Protein scribble homolog	Q14160	116287
MLEC	Malectin	Q14165	1.74684e+06
TTLL12	Tubulin--tyrosine ligase-like protein 12	Q14166	32012.8
MPP2	MAGUK p55 subfamily member 2	Q14168	13079.7
POLA2	DNA polymerase alpha subunit B	Q14181	46873.8
DOCK1	Dedicator of cytokinesis protein 1	Q14185	31410.7
FHL2	Four and a half LIM domains protein 2	Q14192	56911.6
ZMYM3	Zinc finger MYM-type protein 3	Q14202	3654.98
DCTN1	Dynactin subunit 1	Q14203	123820
DYNC1H1	Cytoplasmic dynein 1 heavy chain 1	Q14204	524531
MAP7	Ensconsin	Q14244	31114.8
CTTN	Src substrate cortactin	Q14247	25591.5
FLOT2	Flotillin-2	Q14254	53438.3
RCN2	Reticulocalbin-2	Q14257	257919
TRIM25	E3 ubiquitin/ISG15 ligase TRIM25	Q14258	87626
FKBP8	Peptidyl-prolyl cis-trans isomerase FKBP8	Q14318	337283
FZD2	Frizzled-2	Q14332	1.29434
GNA13	Guanine nucleotide-binding protein subunit alpha-13	Q14344	31548.7
PIGH	Phosphatidylinositol N-acetylglucosaminyltransferase subunit H	Q14442	42277.7
CAPRIN1	Caprin-1	Q14444	13861.8
HES1	Transcription factor HES-1	Q14469	22317.5
RBM39	RNA-binding protein 39	Q14498	206997
FAT1	Protocadherin Fat 1	Q14517	221787
HLTF	Helicase-like transcription factor	Q14527	42959.4
SQLE	Squalene monooxygenase	Q14534	90643
PRPSAP1	Phosphoribosyl pyrophosphate synthase-associated protein 1	Q14558	450021
MCM6	DNA replication licensing factor MCM6	Q14566	422103
HSP90AA2P	Heat shock protein HSP 90-alpha A2	Q14568	614343
ITPR2	Inositol 1,4,5-trisphosphate receptor type 2	Q14571	242118
ITPR3	Inositol 1,4,5-trisphosphate receptor type 3	Q14573	160767
DSC3	Desmocollin-3	Q14574	51687.5
ITIH4	Inter-alpha-trypsin inhibitor heavy chain H4	Q14624	78213.1
ITPR1	Inositol 1,4,5-trisphosphate receptor type 1	Q14643	287298
PLS1	Plastin-1	Q14651	72667.6
LAGE3	EKC/KEOPS complex subunit LAGE3	Q14657	130741
TRIP12	E3 ubiquitin-protein ligase TRIP12	Q14669	61868.3
PUM1	Pumilio homolog 1	Q14671	155635
SMC1A	Structural maintenance of chromosomes protein 1A	Q14683	227078
PDCD11	Protein RRP5 homolog	Q14690	73594.2
USP10	Ubiquitin carboxyl-terminal hydrolase 10	Q14694	245227
GANAB	Neutral alpha-glucosidase AB	Q14697	846060
MBTPS1	Membrane-bound transcription factor site-1 protease	Q14703	75844.2
PPP2R5D	Serine/threonine-protein phosphatase 2A 56 kDa regulatory subunit delta isoform	Q14738	83142.5
LBR	Delta(14)-sterol reductase	Q14739	968058
COG2	Conserved oligomeric Golgi complex subunit 2	Q14746	45553.2
LTBP1	Latent-transforming growth factor beta-binding protein 1	Q14766	7303.43
NAA30	N-alpha-acetyltransferase 30	Q147X3	20559.6
KIF22	Kinesin-like protein KIF22	Q14807	42489.2
CHD4	Chromodomain-helicase-DNA-binding protein 4	Q14839	82865
RAB39A	Ras-related protein Rab-39A	Q14964	655883
KPNB1	Importin subunit beta-1	Q14974	528974
NUMA1	Nuclear mitotic apparatus protein 1	Q14980	10691.9
PSME4	Proteasome activator complex subunit 4	Q14997	47398.1
GAPVD1	GTPase-activating protein and VPS9 domain-containing protein 1	Q14C86	136718
NAA25	N-alpha-acetyltransferase 25, NatB auxiliary subunit	Q14CX7	12586.2
NCAPH	Condensin complex subunit 2	Q15003	148056
SPCS2	Signal peptidase complex subunit 2	Q15005	526050
EMC2	ER membrane protein complex subunit 2	Q15006	1.03031e+06
WTAP	Pre-mRNA-splicing regulator WTAP	Q15007	9299.87
PSMD6	26S proteasome non-ATPase regulatory subunit 6	Q15008	364493
HERPUD1	Homocysteine-responsive endoplasmic reticulum-resident ubiquitin-like domain member 1 protein	Q15011	17515.5
ABRAXAS2	BRISC complex subunit Abraxas 2	Q15018	29455.3
2024-09-02	Septin-2	Q15019	51253.5
NCAPD2	Condensin complex subunit 1	Q15021	195688
SUZ12	Polycomb protein SUZ12	Q15022	13712.9
EXOSC7	Exosome complex component RRP42	Q15024	19245.4
EFTUD2	116 kDa U5 small nuclear ribonucleoprotein component	Q15029	715841
LARS2	Probable leucine--tRNA ligase, mitochondrial	Q15031	22789.2
R3HDM1	R3H domain-containing protein 1	Q15032	5245.71
SNX17	Sorting nexin-17	Q15036	35447.3
ARL6IP1	ADP-ribosylation factor-like protein 6-interacting protein 1	Q15041	148989
RAB3GAP1	Rab3 GTPase-activating protein catalytic subunit	Q15042	61201.4
SLC39A14	Zinc transporter ZIP14	Q15043	72351.3
KARS	Lysine--tRNA ligase	Q15046	192168
SETDB1	Histone-lysine N-methyltransferase SETDB1	Q15047	27128.8
LRRC14	Leucine-rich repeat-containing protein 14	Q15048	29642.2
RRS1	Ribosome biogenesis regulatory protein homolog	Q15050	7209.69
IQCB1	IQ calmodulin-binding motif-containing protein 1	Q15051	418224
POLD3	DNA polymerase delta subunit 3	Q15054	198821
EIF4H	Eukaryotic translation initiation factor 4H	Q15056	49081.6
ACAP2	Arf-GAP with coiled-coil, ANK repeat and PH domain-containing protein 2	Q15057	2350.68
WDR43	WD repeat-containing protein 43	Q15061	41773.6
POSTN	Periostin	Q15063	49102.5
OXA1L	Mitochondrial inner membrane protein OXA1L	Q15070	225479
ZNF146	Zinc finger protein OZF	Q15072	8718.95
PDIA6	Protein disulfide-isomerase A6	Q15084	387436
PDK1	[Pyruvate dehydrogenase (acetyl-transferring)] kinase isozyme 1, mitochondrial	Q15118	35737.8
PDK2	[Pyruvate dehydrogenase (acetyl-transferring)] kinase isozyme 2, mitochondrial	Q15119	30971
PDK3	[Pyruvate dehydrogenase (acetyl-transferring)] kinase isozyme 3, mitochondrial	Q15120	164780
EBP	3-beta-hydroxysteroid-Delta(8),Delta(7)-isomerase	Q15125	330639
NOMO1	Nodal modulator 1	Q15155	296550
PON2	Serum paraoxonase/arylesterase 2	Q15165	259503
PPA1	Inorganic pyrophosphatase	Q15181	65879.7
PTGES3	Prostaglandin E synthase 3	Q15185	69144
STK38	Serine/threonine-protein kinase 38	Q15208	15366
NECTIN1	Nectin-1	Q15223	12529.6
NONO	Non-POU domain-containing octamer-binding protein	Q15233	599064
PTPRK	Receptor-type tyrosine-protein phosphatase kappa	Q15262	43438.8
RASA2	Ras GTPase-activating protein 2	Q15283	64222.1
RAB35	Ras-related protein Rab-35	Q15286	16415.3
RBBP5	Retinoblastoma-binding protein 5	Q15291	8480.03
RCN1	Reticulocalbin-1	Q15293	1.57751e+06
LRRC41	Leucine-rich repeat-containing protein 41	Q15345	77587.9
TMED2	Transmembrane emp24 domain-containing protein 2	Q15363	352140
PCBP1	Poly(rC)-binding protein 1	Q15365	1.39522e+06
PCBP2	Poly(rC)-binding protein 2	Q15366	2.21892e+06
ELOC	Elongin-C	Q15369	128277
ELOB	Elongin-B	Q15370	219451
EPHA7	Ephrin type-A receptor 7	Q15375	46223.7
RHEB	GTP-binding protein Rheb	Q15382	21852.7
UBE3C	Ubiquitin-protein ligase E3C	Q15386	377578
TOMM20	Mitochondrial import receptor subunit TOM20 homolog	Q15388	576079
MTFR1	Mitochondrial fission regulator 1	Q15390	35160.3
DHCR24	Delta(24)-sterol reductase	Q15392	507357
SF3B3	Splicing factor 3B subunit 3	Q15393	718595
PUM3	Pumilio homolog 3	Q15397	29038.8
DLGAP5	Disks large-associated protein 5	Q15398	8005.09
CNN3	Calponin-3	Q15417	104052
SAFB	Scaffold attachment factor B1	Q15424	4345.97
SF3A2	Splicing factor 3A subunit 2	Q15428	13565.3
SEC23A	Protein transport protein Sec23A	Q15436	46527.2
SEC23B	Protein transport protein Sec23B	Q15437	58722.8
SHB	SH2 domain-containing adapter protein B	Q15464	20056.1
SKIV2L	Helicase SKI2W	Q15477	91028.8
TAF7	Transcription initiation factor TFIID subunit 7	Q15545	49510.6
MAPRE2	Microtubule-associated protein RP/EB family member 2	Q15555	40141.9
TRADD	Tumor necrosis factor receptor type 1-associated DEATH domain protein	Q15628	76216.5
TRAM1	Translocating chain-associated membrane protein 1	Q15629	238616
TSN	Translin	Q15631	46206.3
TARBP2	RISC-loading complex subunit TARBP2	Q15633	22671.7
SF1	Splicing factor 1	Q15637	58746.4
TRIP13	Pachytene checkpoint protein 2 homolog	Q15645	308798
ZNHIT3	Zinc finger HIT domain-containing protein 3	Q15649	8301.6
TRIP6	Thyroid receptor-interacting protein 6	Q15654	31665.5
ELAVL1	ELAV-like protein 1	Q15717	94946.3
NSDHL	Sterol-4-alpha-carboxylate 3-dehydrogenase, decarboxylating	Q15738	178246
MYLK	Myosin light chain kinase, smooth muscle	Q15746	53910.9
TAB1	TGF-beta-activated kinase 1 and MAP3K7-binding protein 1	Q15750	34505.9
SLC1A5	Neutral amino acid transporter B(0)	Q15758	426053
MLF2	Myeloid leukemia factor 2	Q15773	25203
MSMO1	Methylsterol monooxygenase 1	Q15800	92809.9
TBCE	Tubulin-specific chaperone E	Q15813	139865
NPTX1	Neuronal pentraxin-1	Q15818	256220
NEDD8	NEDD8	Q15843	337614
ATP6AP1	V-type proton ATPase subunit S1	Q15904	129759
EZH2	Histone-lysine N-methyltransferase EZH2	Q15910	9197.59
2024-09-07	Septin-7	Q16181	40139.8
ADRM1	Proteasomal ubiquitin receptor ADRM1	Q16186	255747
PDCD2	Programmed cell death protein 2	Q16342	85878.2
LAMA4	Laminin subunit alpha-4	Q16363	64812
EXT1	Exostosin-1	Q16394	17588.4
PKN2	Serine/threonine-protein kinase N2	Q16513	208391
TAF12	Transcription initiation factor TFIID subunit 12	Q16514	20983.7
CSRP2	Cysteine and glycine-rich protein 2	Q16527	24358.9
DDB1	DNA damage-binding protein 1	Q16531	501363
CDC37	Hsp90 co-chaperone Cdc37	Q16543	101918
PCSK7	Proprotein convertase subtilisin/kexin type 7	Q16549	20902.3
DPYSL2	Dihydropyrimidinase-related protein 2	Q16555	47546.4
SYPL1	Synaptophysin-like protein 1	Q16563	943897
RBBP7	Histone-binding protein RBBP7	Q16576	268233
SGCB	Beta-sarcoglycan	Q16585	115879
TAF9;TAF9B	Transcription initiation factor TFIID subunit 9;Transcription initiation factor TFIID subunit 9B	Q16594;Q9HBM6	36575.2
BAK1	Bcl-2 homologous antagonist/killer	Q16611	49784.1
SRSF7	Serine/arginine-rich splicing factor 7	Q16629	101064
CPSF6	Cleavage and polyadenylation specificity factor subunit 6	Q16630	19556.1
DBN1	Drebrin	Q16643	30437.4
FSCN1	Fascin	Q16658	36587.3
DECR1	2,4-dienoyl-CoA reductase, mitochondrial	Q16698	28053.4
MAN2A1	Alpha-mannosidase 2	Q16706	17665.7
NDUFA5	NADH dehydrogenase [ubiquinone] 1 alpha subcomplex subunit 5	Q16718	114609
UBE2S	Ubiquitin-conjugating enzyme E2 S	Q16763	29688.6
HAGH	Hydroxyacylglutathione hydrolase, mitochondrial	Q16775	18265.1
LAMA3	Laminin subunit alpha-3	Q16787	50479.1
NDUFA9	NADH dehydrogenase [ubiquinone] 1 alpha subcomplex subunit 9, mitochondrial	Q16795	192962
PCK2	Phosphoenolpyruvate carboxykinase [GTP], mitochondrial	Q16822	97793.5
CYP51A1	Lanosterol 14-alpha demethylase	Q16850	357349
ATP6V1F	V-type proton ATPase subunit F	Q16864	38616.6
PFKFB3	6-phosphofructo-2-kinase/fructose-2,6-bisphosphatase 3	Q16875	45153.5
UGT8	2-hydroxyacylsphingosine 1-beta-galactosyltransferase	Q16880	826629
IMMT	MICOS complex subunit MIC60	Q16891	470264
KCTD19	BTB/POZ domain-containing protein KCTD19	Q17RG1	49559.8
[truncated: 2,017 more rows]
